# Supplementary material for: Copper(ii) and zinc(ii) complexation withN-ethylene hydroxycyclams and consequences on the macrocyclic backbone configuration
Source: Royal Society of Chemistry journal article supplement (doi:10.1039/d2dt00941b), 2022-01-01
Supplement: d2dt00941b1.pdf [file d2dt00941b1.pdf]

Supporting Information

**Copper(II) and Zinc(II) Complexation with *N*-  
Ethylenehydroxycyclams and Consequences on the  
Macrocyclic Backbone Configuration**

Nancy AlHaddad,<sup>†,‡</sup> Evan Lelong,<sup>†,‡</sup> Jong-Min Suh,<sup>‡</sup> Marie Cordier,<sup>§</sup> Mi Hee Lim,<sup>‡</sup> Guy Royal,<sup>‡</sup> Carlos Platas-Iglesias,<sup>⊥</sup> H  l  ne Bernard<sup>†</sup> and Rapha  l Tripier<sup>†</sup>

<sup>†</sup> *Univ. Brest, UMR CNRS 6521 CEMCA, 6 avenue Victor le Gorgeu, 29238 Brest, France. raphael.tripier@univ-brest.fr*

<sup>‡</sup> *Department of Chemistry, Korea Advanced Institute of Science and Technology (KAIST), Daejeon 34141, Republic of Korea. miheelim@kaist.ac.kr*

<sup>§</sup> *Univ Rennes, CNRS, ISCR (Institut des Sciences Chimiques de Rennes) UMR 6226 \ F-35000 Rennes, France. Email: marie.dallon@univ-rennes1.fr*

<sup>‡</sup> *Univ. Grenoble Alpes, D  partement de Chimie Mol  culaire UMR CNRS 5250, 38000 Grenoble, France. guy.royal@univ-grenoble-alpes.fr*

<sup>⊥</sup> *Departamento de Qu  mica, Facultade de Ciencias & Centro de Investigaciones Cient  ficas Avanzadas (CICA), Universidade da Coru  a, 15071 A Coru  a, Spain. carlos.platas.iglesias@udc.es*

<sup>‡</sup> *These authors combtribyed equally*

# Table of contents

|                                                                                                                                                        |          |
|--------------------------------------------------------------------------------------------------------------------------------------------------------|----------|
| <b>Synthesis and characterization of simple and cross-bridged <i>N</i>-ethylenehydroxy-functionalized cyclam ligands</b>                               | <b>2</b> |
| 1. Synthesis of 2-(1,4,8,11-tetraazacyclotetradecan-1-yl)ethan-1-ol [TE1EtOH]                                                                          | 2        |
| 2. Synthesis of 2-(4,8,11-trimethyl-1,4,8,11-tetraazacyclotetradecan-1-yl)ethan-1-ol [TE3MeEtOH]                                                       | 3        |
| 3. Synthesis of 2-(1,4,8,11-tetraazabicyclo[6.6.2]hexadecan-4-yl)ethan-1-ol [CB-TE1EtOH]                                                               | 4        |
| 4. Synthesis of 4-methyl-1,4,8,11-tetraazabicyclo[6.6.2]hexadecane iodide [CB-TEMeEtOH]                                                                | 5        |
| <b>Synthesis and characterization of cyclam complexes with copper(II) and zinc(II)</b>                                                                 | <b>8</b> |
| 5. Characterization of Copper(II) 2-(1,4,8,11-tetraazacyclotetradecan-1-yl)ethan-1-ol dichloride [Cu(TE1EtOH)]Cl <sub>2</sub>                          | 8        |
| 6. Characterization of Zinc(II) 2-(1,4,8,11-tetraazacyclotetradecan-1-yl)ethan-1-ol dichloride [Zn(TE1EtOH)]Cl <sub>2</sub>                            | 8        |
| 7. Characterization of Copper(II) 2-(4,8,11-trimethyl-1,4,8,11-tetraazacyclotetradecan-1-yl)ethan-1-ol dichloride [Cu(TE3MeEtOH)]Cl <sub>2</sub>       | 9        |
| 8. Characterization of Zinc(II) 2-(4,8,11-trimethyl-1,4,8,11-tetraazacyclotetradecan-1-yl)ethan-1-ol dichloride [Zn(TE3MeEtOH)]Cl <sub>2</sub>         | 9        |
| 9. Characterization of Copper(II) 2-(1,4,8,11-tetraazabicyclo[6.6.2]hexadecan-4-yl)ethan-1-ol dichloride [Cu(CB-TE1EtOH)]Cl <sub>2</sub>               | 9        |
| 10. Characterization of Zinc(II) 2-(1,4,8,11-tetraazabicyclo[6.6.2]hexadecan-4-yl)ethan-1-ol dichloride [Zn(CB-TE1EtOH)]Cl <sub>2</sub>                | 10       |
| 11. Characterization of Copper(II) 2-(4-methyl-1,4,8,11-tetraazabicyclo[6.6.2]hexadecane iodide)ethan-1-ol dichloride [Cu(CB-TEMeEtOH)]Cl <sub>2</sub> | 10       |

|                                                                                                                                                           |                                                                                                                                                        |           |
|-----------------------------------------------------------------------------------------------------------------------------------------------------------|--------------------------------------------------------------------------------------------------------------------------------------------------------|-----------|
| 12.                                                                                                                                                       | <i>Characterization of Zinc(II) 2-(4-methyl-1,4,8,11 tetraazabicyclo[6.6.2]hexadecane iodide)ethan-1-ol dichloride [Zn(CB-TEMeEtOH)]Cl<sub>2</sub></i> | 11        |
| <b>NMR characterization of cyclam ligands</b>                                                                                                             |                                                                                                                                                        | <b>12</b> |
| 13.                                                                                                                                                       | <i><sup>1</sup>H and <sup>13</sup>C NMR characterization of TE1EtOH</i>                                                                                | 12        |
| 14.                                                                                                                                                       | <i><sup>1</sup>H and <sup>13</sup>C NMR characterization of TE3MeEtOH</i>                                                                              | 13        |
| 15.                                                                                                                                                       | <i><sup>1</sup>H and <sup>13</sup>C NMR characterization of CB-TEEtOH</i>                                                                              | 14        |
| 16.                                                                                                                                                       | <i><sup>1</sup>H and <sup>13</sup>C NMR characterization of CB-TEMeEtOH</i>                                                                            | 15        |
| <b>HR-MS characterization of cyclam ligands</b>                                                                                                           |                                                                                                                                                        | <b>16</b> |
| <b>NMR Characterization of cyclam-Zinc(II) complexes</b>                                                                                                  |                                                                                                                                                        | <b>20</b> |
| 17.                                                                                                                                                       | <i>1D and 2D NMR characterization of [Zn(TE1EtOH)]Cl<sub>2</sub></i>                                                                                   | 20        |
| 18.                                                                                                                                                       | <i>1D and 2D NMR characterization of [Zn.TE3MeEtOH]Cl<sub>2</sub></i>                                                                                  | 24        |
| 19.                                                                                                                                                       | <i>1D and 2D NMR characterization of [Zn(CB-TE1EtOH)]Cl<sub>2</sub></i>                                                                                | 27        |
| 20.                                                                                                                                                       | <i>1D and 2D NMR characterization of [Zn(CB-TEMeEtOH)]Cl<sub>2</sub></i>                                                                               | 30        |
| <b>DFT calculations and results</b>                                                                                                                       |                                                                                                                                                        | <b>48</b> |
| <b>Visible spectra of copper complexes of TE1EtOH, TE3MeEtOH, CB-TE1EtOH and CB-TEMeEtOH</b>                                                              |                                                                                                                                                        | <b>63</b> |
| <b>Experimental and simulated X band EPR spectra of Copper(II) complexes considering the presence of one paramagnetic species in solution.</b>            |                                                                                                                                                        | <b>64</b> |
| <b>Experimental and simulated X-band EPR spectra of [Cu(CB-TEMeEtOH)]Cl<sub>2</sub> considering the presence of two paramagnetic species in solution.</b> |                                                                                                                                                        | <b>66</b> |
| <b>Study of Copper(II) complexes dissociation in acidic media</b>                                                                                         |                                                                                                                                                        | <b>68</b> |
| <b>Electrochemical studies of Copper(II) complexes</b>                                                                                                    |                                                                                                                                                        | <b>69</b> |



# List of figures

|                                                                                                                                                                      |    |
|----------------------------------------------------------------------------------------------------------------------------------------------------------------------|----|
| Figure S 1. $^1\text{H}$ (up) and $^{13}\text{C}$ (down) NMR (300 and 75 MHz, $\text{CDCl}_3$ , 298 K) spectra of TE1EtOH.                                           | 12 |
| Figure S2. NMR $^1\text{H}$ (up) and $^{13}\text{C}$ Jmod (down) (500 and 125 MHz, $\text{CDCl}_3$ , 298 K) spectra of TE3MeEtOH.                                    | 13 |
| Figure S3. $^1\text{H}$ (up) and $^{13}\text{C}$ (down) NMR (500 and 125 MHz, $\text{CDCl}_3$ , 298 K) spectra of CB-TE1EtOH.                                        | 14 |
| Figure S4. $^1\text{H}$ (up) and $^{13}\text{C}$ Jmod (down) NMR (300 and 75 MHz, $\text{CDCl}_3$ , 298 K) spectra of CB-MeTEEtOH.                                   | 15 |
| Figure S5. ESI-MS spectrum of $[\text{Cu}(\text{TE1EtOH})\text{Cl}_2]$ .                                                                                             | 16 |
| Figure S6. ESI-MS spectrum of $[\text{Zn}(\text{TE1EtOH})\text{Cl}_2]$ .                                                                                             | 16 |
| Figure S 7. ESI-MS spectrum of $[\text{Cu}(\text{TE3MeEtOH})\text{Cl}_2]$ .                                                                                          | 17 |
| Figure S8. ESI-MS spectrum of $[\text{Zn}(\text{TE3MeEtOH})\text{Cl}_2]$ .                                                                                           | 17 |
| Figure S9. ESI-MS spectrum of $[\text{Zn}(\text{CB-TE1EtOH})\text{Cl}_2]$ .                                                                                          | 18 |
| Figure S10. ESI-MS spectrum of $[\text{Cu}(\text{CB-TE1EtOH})\text{Cl}_2]$ .                                                                                         | 18 |
| Figure S11. ESI-MS spectrum of $[\text{Zn}(\text{CB-TEMeEtOH})\text{Cl}_2]$ .                                                                                        | 19 |
| Figure S12. ESI-MS spectrum of $[\text{Cu}(\text{CB-TEMeEtOH})\text{Cl}_2]$ .                                                                                        | 19 |
| Figure S13. $^1\text{H}$ (up) and $^{13}\text{C}$ (down) NMR (500 and 125 MHz, $\text{D}_2\text{O}$ , 298 K) spectra of $[\text{Zn}(\text{TE1EtOH})]\text{Cl}_2$ .   | 20 |
| Figure S14. 2D COSY $^1\text{H}$ - $^1\text{H}$ NMR (500 MHz, $\text{D}_2\text{O}$ , 298 K) spectrum of $[\text{Zn}(\text{TE1EtOH})]\text{Cl}_2$ .                   | 21 |
| Figure S15. 2D HMBC $^1\text{H}$ - $^{13}\text{C}$ NMR (500 MHz, 125 MHz, $\text{D}_2\text{O}$ , 298 K) spectrum of $[\text{Zn}(\text{TE1EtOH})]\text{Cl}_2$ .       | 22 |
| Figure S16. 2D HMQC $^1\text{H}$ - $^{13}\text{C}$ NMR (500 MHz, 125 MHz, $\text{D}_2\text{O}$ , 298 K) spectrum of $[\text{Zn}(\text{TE1EtOH})]\text{Cl}_2$ .       | 23 |
| Figure S17. $^1\text{H}$ (up) and $^{13}\text{C}$ (down) NMR (500 and 125 MHz, $\text{D}_2\text{O}$ , 298 K) spectra of $[\text{Zn}(\text{TE3MeEtOH})]\text{Cl}_2$ . | 24 |
| Figure S18. 2D COSY $^1\text{H}$ - $^1\text{H}$ NMR (500 MHz, $\text{D}_2\text{O}$ , 298 K) spectrum of $[\text{Zn}(\text{TE3MeEtOH})]\text{Cl}_2$ .                 | 25 |
| Figure S19. 2D HMQC $^1\text{H}$ - $^{13}\text{C}$ NMR (500 MHz, 125 MHz, $\text{D}_2\text{O}$ , 298 K) spectrum of $[\text{Zn}(\text{TE3MeEtOH})]\text{Cl}_2$ .     | 26 |

|                                                                                                                                                                                                                                                                                                                                 |    |
|---------------------------------------------------------------------------------------------------------------------------------------------------------------------------------------------------------------------------------------------------------------------------------------------------------------------------------|----|
| Figure S20. 2D HMBC $^1\text{H}$ - $^{13}\text{C}$ NMR (500 MHz, 125 MHz, $\text{D}_2\text{O}$ , 298 K) spectrum of $[\text{Zn}(\text{TE3MeEtOH})]\text{Cl}_2$ .                                                                                                                                                                | 26 |
| Figure S21. $^1\text{H}$ (up) and $^{13}\text{C}$ Jmod (down) NMR (500 and 125 MHz, $\text{D}_2\text{O}$ , 298 K) spectra of $[\text{Zn}(\text{CB-TE1EtOH})]\text{Cl}_2$                                                                                                                                                        | 27 |
| Figure S 22. COSY $^1\text{H}$ - $^1\text{H}$ NMR (500 MHz, $\text{D}_2\text{O}$ , 298 K) spectrum of $[\text{Zn}(\text{CB-TE1EtOH})]\text{Cl}_2$ .                                                                                                                                                                             | 28 |
| Figure S 23. 2D HMQC $^1\text{H}$ - $^{13}\text{C}$ NMR (500 MHz, 125 MHz, $\text{D}_2\text{O}$ , 298 K) spectrum of $[\text{Zn}(\text{CB-TE1EtOH})]\text{Cl}_2$ .                                                                                                                                                              | 28 |
| Figure S 24. 2D HMBC $^1\text{H}$ - $^{13}\text{C}$ NMR (500 MHz, 125 MHz, $\text{D}_2\text{O}$ , 298 K) spectrum of $[\text{Zn}(\text{CB-TE1EtOH})]\text{Cl}_2$ .                                                                                                                                                              | 29 |
| Figure S25. $^1\text{H}$ (up) and $^{13}\text{C}$ Jmod (down) NMR (500 and 125 MHz, $\text{D}_2\text{O}$ , 298 K) spectra of $[\text{Zn}(\text{CB-TEMeEtOH})]\text{Cl}_2$ .                                                                                                                                                     | 30 |
| Figure S26. 2D COSY $^1\text{H}$ - $^1\text{H}$ NMR (500 MHz, $\text{D}_2\text{O}$ , 298 K) spectrum of $[\text{Zn}(\text{CB-TEMeEtOH})]\text{Cl}_2$ .                                                                                                                                                                          | 31 |
| Figure S27. 2D HMQC $^1\text{H}$ - $^{13}\text{C}$ NMR (500 MHz, 125 MHz, $\text{D}_2\text{O}$ , 298 K) spectrum of $[\text{Zn}(\text{CB-TEMeEtOH})]\text{Cl}_2$ .                                                                                                                                                              | 31 |
| Figure S28. 2D HMBC $^1\text{H}$ - $^{13}\text{C}$ NMR (500 MHz, 125 MHz, $\text{D}_2\text{O}$ , 298 K) spectrum of $[\text{Zn}(\text{CB-TEMeEtOH})]\text{Cl}_2$ .                                                                                                                                                              | 32 |
| Figure S 29. Structures of the different isomers of $[\text{Zn}(\text{TE1EtOH})]^{2+}$ optimized with DFT calculations (rtppssh/Def2-TZVPP; scrf=(pcm,solvent=water)).                                                                                                                                                          | 48 |
| Figure S 30. Structures of the Cu(II) complexes optimized with DFT calculations (utppssh/Def2-TZVPP; scrf=(pcm,solvent=water)).                                                                                                                                                                                                 | 49 |
| Figure S31. Visible spectra of $[\text{Cu}(\text{TE1EtOH})\text{Cl}_2]$ (black dashed), $[\text{Cu}(\text{TE3MeEtOH})\text{Cl}_2]$ (red dashed), $[\text{Cu}(\text{CB-TE1EtOH})\text{Cl}_2]$ (blue) and $[\text{Cu}(\text{CB-TE1EtOH})\text{Cl}_2]$ (purple) recorded in ultra-pure water at 6 mM for complexes' concentration. | 63 |
| Figure S32. Experimental (plain lines) and simulated (dashed lines) X-band EPR spectra ( $\nu = 9.31$ GHz) of $[\text{Cu}(\text{TE1EtOH})]^{2+}$ , $[\text{Cu}(\text{TE3MeEtOH})]^{2+}$ , recorded at 20 mM in a frozen solution of $\text{H}_2\text{O}/\text{DMF}$ (1/1) at a 150-152 K.                                       | 64 |

Figure S33. Experimental (plain lines) and simulated (dashed lines) X-band EPR spectra ( $\nu = 9.31$  GHz) of  $[\text{Cu}(\text{CB-TE1EtOH})]^{2+}$  and  $[\text{Cu}(\text{CB-TEMeEtOH})]^{2+}$  recorded at 20 mM in a frozen solution of  $\text{H}_2\text{O}/\text{DMF}$  (1/1) at a 150-152 K. 65

Figure S34. Experimental (plain lines) and simulated (dashed lines) X-band EPR spectra ( $\nu = 9.31$  GHz) of  $[\text{Cu}(\text{CB-TEMeEtOH})]^{2+}$  recorded at 20 mM in a frozen solution of  $\text{H}_2\text{O}/\text{DMF}$  (1/1) at a 150-152 K, considering the presence of two species in solution (A & B). 67

Figure S35. Visible spectra of acid-mediated dissociation of  $[\text{Cu}(\text{TE1EtOH})]^{2+}$ ,  $[\text{Cu}(\text{TE3MeEtOH})]^{2+}$  (3 mM in 3 M HCl at 25 °C),  $[\text{Cu}(\text{CB-TE1EtOH})]^{2+}$  and  $[\text{Cu}(\text{CB-TEMeEtOH})]^{2+}$  (3 mM in 5 M HCl at 70 °C) with a gap time ranging from 10 to 30 minutes. Arrows indicate the changes in absorbance during the experiment on both sides of isobestic points. Exponential curves corresponding to experimental/model fitting of the function  $A_{\lambda_{\text{max}}} = f(t)$  made on OriginPro9.  $R^2$  is the adjusting parameter and  $A_{\infty}$  the asymptote of the exponential model. 68

Figure S 36. Cyclic voltammograms of  $[\text{Cu}(\text{TE1EtOH})]\text{Cl}_2$  in DMF + TBAPF<sub>6</sub> (0.1 M). Scan rate 0.1 V.s<sup>-1</sup>. \*Signals are attributed to redissolution peaks. 69

Figure S 37. Cyclic voltammograms of  $[\text{Cu}(\text{CB-TEEtOH})]\text{Cl}_2$  in DMF + TBAPF<sub>6</sub> (0.1 M). Scan rate 0.1 V.s<sup>-1</sup>. \*Signals are attributed to redissolution peaks. 69

Figure S 38. Cyclic voltammograms of  $[\text{Cu}(\text{CB-TEMeEtOH})]\text{Cl}_2$  in DMF + TBAPF<sub>6</sub> (0.1 M). Scan rate 0.1 V.s<sup>-1</sup>. \*Signals are attributed to redissolution peaks. 70

## List of Tables

|                                                                                                                                                                       |    |
|-----------------------------------------------------------------------------------------------------------------------------------------------------------------------|----|
| Table S1. Crystallographic data of [Zn(TE1EtOH)Cl]Cl.                                                                                                                 | 33 |
| Table S2. Cartesian coordinates (Å) of [Zn(TE1EtOH)Cl]Cl.                                                                                                             | 35 |
| Table S3. Crystallographic data of [Cu(TE1EtOH)Cl]Cl.                                                                                                                 | 37 |
| Table S4. Cartesian coordinates (Å) of [Cu(TE1EtOH)Cl]Cl.                                                                                                             | 38 |
| Table S5. Crystallographic data of [Zn(TE3MeEtOH)](ZnCl <sub>4</sub> ).                                                                                               | 41 |
| Table S6. Cartesian coordinates (Å) of [Zn(TE3MeEtOH)](ZnCl <sub>4</sub> ).                                                                                           | 42 |
| Table S7. Crystallographic data of [Cu(TE3MeEtOH)](ClO <sub>4</sub> ) <sub>2</sub> .                                                                                  | 43 |
| Table S8. Cartesian coordinates (Å) of [Cu(TE3MeEtOH)](ClO <sub>4</sub> ) <sub>2</sub> .                                                                              | 45 |
| Table S 9. <sup>13</sup> C NMR chemical shifts for the central carbon of the propylene units of [Zn(TE1EtOH)]Cl <sub>2</sub> and the values calculated with DFT.      | 50 |
| Table S 10. Cartesian coordinates of [Zn(TE1EtOH)] <sup>2+</sup> ( <i>trans</i> -I) optimized with DFT calculations (rtpssh/Def2-TZVPP; scrf=(pcm,solvent=water)).    | 50 |
| Table S 11. Cartesian coordinates of [Zn(TE1EtOH)] <sup>2+</sup> ( <i>trans</i> -II) optimized with DFT calculations (rtpssh/Def2-TZVPP; scrf=(pcm,solvent=water)).   | 51 |
| Table S 12. Cartesian coordinates of [Zn(TE1EtOH)] <sup>2+</sup> ( <i>trans</i> -III) optimized with DFT calculations (rtpssh/Def2-TZVPP; scrf=(pcm,solvent=water)).  | 53 |
| Table S 13. Cartesian coordinates of [Zn(TE1EtOH)] <sup>2+</sup> ( <i>cis</i> -V) optimized with DFT calculations (rtpssh/Def2-TZVPP; scrf=(pcm,solvent=water)).      | 54 |
| Table S 14. Cartesian coordinates of [Cu(TE1EtOH)] <sup>2+</sup> ( <i>trans</i> -III) optimized with DFT calculations (utpssh/Def2-TZVPP; scrf=(pcm,solvent=water)).  | 55 |
| Table S 15. Cartesian coordinates of [Cu(TE3Me1EtOH)] <sup>2+</sup> ( <i>trans</i> -I) optimized with DFT calculations (utpssh/Def2-TZVPP; scrf=(pcm,solvent=water)). | 56 |
| Table S 16. Cartesian coordinates of [Cu(CB-TE1EtOH)] <sup>2+</sup> ( <i>cis</i> -V) optimized with DFT calculations (utpssh/Def2-TZVPP; scrf=(pcm,solvent=water)).   | 58 |
| Table S 17. Cartesian coordinates of [Cu(CB-TEMeEtOH)] <sup>2+</sup> ( <i>cis</i> -V) optimized with DFT calculations (utpssh/Def2-TZVPP; scrf=(pcm,solvent=water)).  | 59 |
| Table S 1. NMR calculation for EPR-TPSSH of [Cu(CBTE1EtOH)] <sup>2+</sup>                                                                                             | 60 |



## Glossary of the N-ethylene hydroxy-functionalized cyclam series

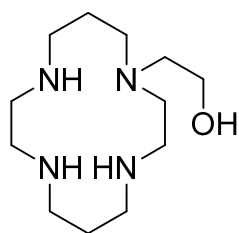

TE1EtOH

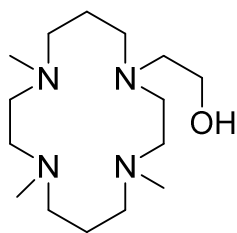

TE3MeEtOH

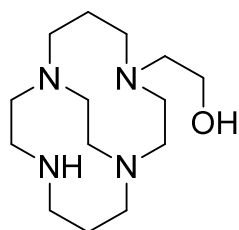

CB-TE1EtOH

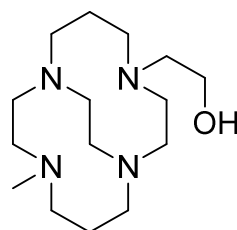

CB-TEMeEtOH

**TE1EtOH:** 2-(1,4,8,11-tetraazacyclotetradecan-1-yl)ethan-1-ol

**TE3MeEtOH:** 2-(4,8,11-trimethyl-1,4,8,11-tetraazacyclotetradecan-1-yl)ethan-1-ol

**CB-TE1EtOH:** 2-(1,4,8,11-tetraazabicyclo[6.6.2]hexadecan-4-yl)ethan-1-ol

**CB-TEMeEtOH:** 2-(11-methyl-1,4,8,11-tetraazabicyclo[6.6.2]hexadecan-4-yl)ethan-1-ol

# Synthesis and characterization of simple and cross-bridged *N*-ethylenehydroxy-functionalized cyclam ligands

## 1. Synthesis of 2-(1,4,8,11-tetraazacyclotetradecan-1-yl)ethan-1-ol [TE1EtOH]

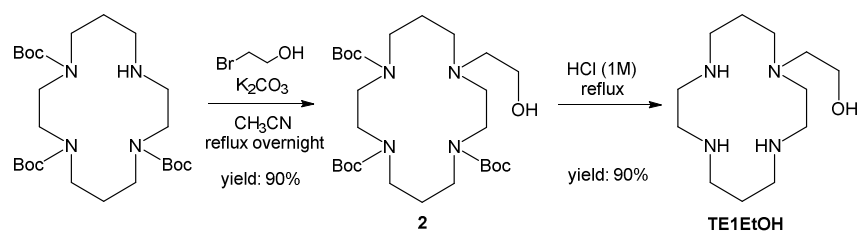

**Compound 2:** Bromoethanol (2.25 g, 1.28 mL, 18.0 mmol) was rapidly added to a solution of tri-Boc-cyclam (1.80 g, 3.6 mmol) in CH<sub>3</sub>CN (50 mL) with K<sub>2</sub>CO<sub>3</sub> (1.00 g, 7.2 mmol) and the mixture was stirred at reflux overnight. The solution was filtered and solvent was removed under reduced pressure. The obtained white foam was dissolved in NaOH solution (4 M, 15 mL) and stirred for 3 hours at room temperature. Aqueous layer was extracted with CHCl<sub>3</sub> (4 x 40 mL). Organic layers were combined, dried over MgSO<sub>4</sub> and evaporated. Compound **2** was then purified on silica column (CH<sub>2</sub>Cl<sub>2</sub>/AcOEt 50/50 then AcOEt) and was obtained as a white powder (1.76 g, 90 %).

**<sup>13</sup>C Jmod NMR (125 MHz, CD<sub>3</sub>CN, 343 K):**  $\delta$  = [156.9, 156.8, 156.7] (C<sub>q</sub>=O), [80.3, 80.2, 80.1] (C(CH<sub>3</sub>)<sub>3</sub>), [60.7, 58.7, 55.7, 53.8, 49.1, 48.7, 48.4, 48.3, 47.9, 47.2] (CH<sub>2</sub>- $\alpha$ -N, CH<sub>2</sub>- $\alpha$ -OH), [29.9, 28.3] (CH<sub>2</sub>- $\beta$ -N), 29.0 ppm (C(CH<sub>3</sub>)<sub>3</sub>).

**<sup>1</sup>H NMR (500 MHz, CD<sub>3</sub>CN, 298 K):**  $\delta$  = 3.53-3.48 (m, 2H), 3.33-3.27 (m, 10H), 3.22-3.20 (m, 2H), 2.60-2.58 (m, 2H), 2.52-2.49 (m, 2H), 2.45-2.43 (m, 2H), 1.86-1.81 (m, 2H), 1.66-1.63 (m, 2H), 1.43 ppm (s, 27H, C(CH<sub>3</sub>)<sub>3</sub>).

**HRMS (ESI):**  $m/z$  calcd for C<sub>27</sub>H<sub>53</sub>N<sub>4</sub>O<sup>7+</sup> [M+H]<sup>+</sup> 545.3909, found 545.3910.

**TE1EtOH:** Compound **2** (3.70 g, 6.8 mmol) was stirred at reflux 4 h in HCl solution (1 M, 20 mL). After cooling down, aqueous layer was washed with Et<sub>2</sub>O to remove organic impurities. At 0 °C, NaOH pellets were added till pH > 12 and aqueous layer was extracted with CHCl<sub>3</sub> (4 x 50 mL). Organic layers were combined, dried over MgSO<sub>4</sub> and evaporated. **TE1EtOH** was obtained as a white solid (1.49 g, 90 %).

**<sup>13</sup>C Jmod NMR (75 MHz, CDCl<sub>3</sub>, 298 K):** δ = [62.5, 58.1, 58.0, 57.5, 51.6, 50.6, 50.4, 49.0, 48.5, 48.1] (CH<sub>2</sub>-α-N, CH<sub>2</sub>-α-OH), [28.8, 26.6] ppm (CH<sub>2</sub>-β-N).

**<sup>1</sup>H NMR (300 MHz, CDCl<sub>3</sub>, 298 K):** δ = 3.59-3.56 (m, 2H, CH<sub>2</sub>-α-OH), 3.50 (br s, 3H, N-H), 2.81-2.70 (m, 8H), 2.64-2.53 (m, 10H), 1.85-1.69 ppm (m, 4H, CH<sub>2</sub>-β-N).

**HRMS (ESI):** *m/z* calcd for C<sub>12</sub>H<sub>29</sub>N<sub>4</sub>O<sup>+</sup> [M+H]<sup>+</sup> 245.2336, found 245.2333, calcd for C<sub>12</sub>H<sub>30</sub>N<sub>4</sub>O<sup>2+</sup> [M+2H]<sup>2+</sup> 123.1204, found 123.1202.

## 2. Synthesis of 2-(4,8,11-trimethyl-1,4,8,11-tetraazacyclotetradecan-1-yl)ethan-1-ol [TE3MeEtOH]

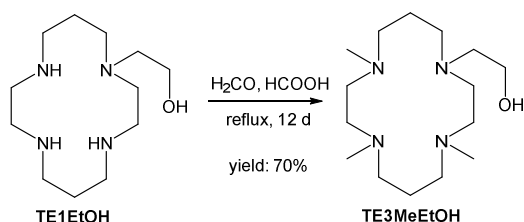

**TE3MeEtOH:** **TE1EtOH** (1.00 g, 4.1 mmol) was dissolved in 37 % formaldehyde in water (5.00 mL, 1.50 g, 49.9 mmol) and formic acid (5.00 mL, 6.10 g, 132.0 mmol). The solution was stirred at reflux for 12 days, 1.00 mL of formic acid was added after 4 days and 8 days. The mixture was evaporated under reduced pressure and NaOH solution (4 M, 10 mL) was added. This solution was stirred at reflux for 2 h and alkaline aqueous layer was extracted with CHCl<sub>3</sub> (4 x 40 mL). Organic layers were combined, dried over MgSO<sub>4</sub> and evaporated under reduced pressure.

**TE3MeEtOH** was purified on silica column ( $\text{CH}_2\text{Cl}_2/\text{iPr-NH}_2$  98/2 to 96/4) and was obtained as a colorless oil (0.82 g, 70 %).

**$^{13}\text{C}$  Jmod NMR (125 MHz,  $\text{CDCl}_3$ , 298 K):**  $\delta$  = [61.3, 56.2, 55.9, 55.8, 55.3, 54.7, 52.6, 52.3, 52.2, 50.0] ( $\text{CH}_2\text{-}\alpha\text{-N}$ ,  $\text{CH}_2\text{-}\alpha\text{-OH}$ ), [44.0, 43.2, 42.7] ( $\text{N-CH}_3$ ), [25.5, 25.0] ppm ( $\text{CH}_2\text{-}\beta\text{-N}$ ).

**$^1\text{H}$  NMR (500 MHz,  $\text{CDCl}_3$ , 298 K):**  $\delta$  = 3.46-3.44 (m, 2H,  $\text{CH}_2\text{-}\alpha\text{-OH}$ ), 2.52-2.32 (m, 18H,  $\text{CH}_2\text{-}\alpha\text{-N}$ ), 2.17 (s, 3H), 2.13 (s, 3H), 2.12 (m, 3H), 1.64-1.54 ppm (m, 4H,  $\text{CH}_2\text{-}\beta\text{-N}$ ).

**HRMS (ESI):**  $m/z$  calcd for  $\text{C}_{15}\text{H}_{35}\text{N}_4\text{O}^+$  [ $\text{M}+\text{H}$ ] $^+$  287.2805, found 287.2803, calcd for  $\text{C}_{15}\text{H}_{36}\text{N}_4\text{O}^{2+}$  [ $\text{M}+2\text{H}$ ] $^{2+}$  144.1439, found 144.1435.

### 3. Synthesis of 2-(1,4,8,11-tetraazabicyclo[6.6.2]hexadecan-4-yl)ethan-1-ol [CB-TE1EtOH]

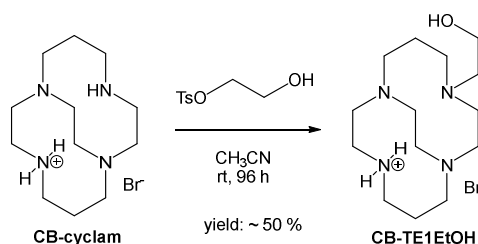

**CB-TE1EtOH:** Ethylenehydroxy-tosylate (0.22 g, 1.0 mmol) in  $\text{CH}_3\text{CN}$  (10 mL) was slowly added (20 h with syringe driver) to a solution of **CB-cyclam** (0.23 g, 1.0 mmol) in  $\text{CH}_3\text{CN}$  (200 mL). The mixture was stirred 4 days till all the ethylenehydroxy-tosylate was consumed. Reaction progress was tracked by silica TLC (Thin Layer Chromatography). Solvent was evaporated under reduced pressure, 10 mL of NaOH solution (4 M) was added and aqueous layer was extracted with  $\text{CHCl}_3$  (4 x 20 mL). Organic layers were combined, dried over  $\text{MgSO}_4$  and solvent was evaporated. **CB-TE1EtOH** was purified (a) on alumina column ( $\text{CH}_2\text{Cl}_2/\text{MeOH}$  99/1 to 95/5) to obtain beige oil (0.15 mg, 55 %) and (b) by flash chromatography on a C18 column in a mixture of  $\text{H}_2\text{O}/\text{CH}_3\text{CN}$  (a gradient of 0 to 100% of  $\text{H}_2\text{O}$ ) to obtain a beige oil (0.14 mg, 51%).

**<sup>13</sup>C Jmod NMR (75 MHz, CDCl<sub>3</sub>, 298 K):**  $\delta$  = [61.7, 59.2, 59.0, 55.7, 55.5, 54.9, 53.8, 53.4, 51.9, 51.0, 46.7, 45.0] (CH<sub>2</sub>- $\alpha$ -N), [28.7, 22.2] ppm (CH<sub>2</sub>- $\beta$ -N).

**<sup>1</sup>H NMR (300 MHz, CDCl<sub>3</sub>, 298 K):**  $\delta$  = 3.83-3.73 (m, 2H, CH<sub>2</sub>- $\alpha$ -OH), 3.54-3.50 (m, 1H), 3.30-3.25 (m, 1H), 2.99-2.37 (m, 22H), 1.90-1.76 (m, 2H), 1.71-1.59 ppm (m, 2H).

**HRMS (ESI):** *m/z* calcd for C<sub>14</sub>H<sub>31</sub>N<sub>4</sub>O<sup>+</sup> [M+H]<sup>+</sup> 271.2492, found 271.2493, calcd for C<sub>14</sub>H<sub>32</sub>N<sub>4</sub>O<sup>2+</sup> [M+2H]<sup>2+</sup> 136.1283, found 136.1283.

#### 4. Synthesis of 4-methyl-1,4,8,11-tetraazabicyclo[6.6.2]hexadecane iodide [CB-TEMeEtOH]

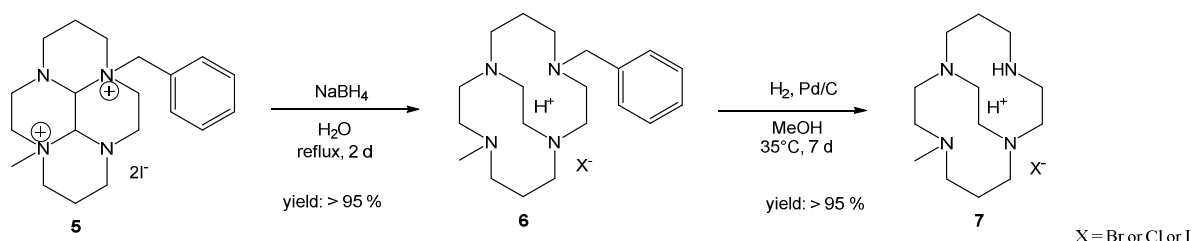

**Compound 6:** To a solution of compound **5** (1.70 g, 2.9 mmol) in ethanol (50 mL), NaBH<sub>4</sub> (1.10 g, 29.2 mmol) was slowly added and the mixture was stirred at reflux 2 days. Solvent was evaporated under reduced pressure and white residue was dissolved in NaOH solution (4 M, 15 mL). The aqueous layer was extracted with CHCl<sub>3</sub> (4 x 40 mL). Organic layers were combined, dried over MgSO<sub>4</sub> and evaporated. Compound **6** was obtained as brown oil (1.35 g, quantitative).

**<sup>13</sup>C Jmod NMR (125 MHz, CDCl<sub>3</sub>, 298 K):**  $\delta$  = 140.8 (C<sub>q</sub>, ar), [128.7, 127.9, 126.3] (CH<sub>ar</sub>), [59.8, 59.2, 57.7, 56.5, 56.4, 56.0, 55.9, 54.8, 53.9, 52.0, 51.8] (CH<sub>2</sub>- $\alpha$ -N), 42.7 (N-CH<sub>3</sub>), [27.7, 26.8] ppm (CH<sub>2</sub>- $\beta$ -N).

**<sup>1</sup>H NMR (500 MHz, CDCl<sub>3</sub>, 298 K):**  $\delta$  = 7.31-7.22 (m, 5H<sub>ar</sub>), 4.43 (d, J=14 Hz, 1H), 4.03 (d, J = 14 Hz, 1H), 3.43-3.29 (m, 2H), 3.22-3.14 (m, 1H), 3.10-3.01 (m, 1H), 2.99-2.80 (m, 6H), 2.66-2.57 (m, 2H), 2.50-2.41 (m, 2H), 2.47 (s, 3H), 2.36-2.25 (m, 4H), 2.10-1.97 (m, 3H), 1.81-1.76 (m, 1H), 1.54-1.45 ppm (m, 2H).

**HRMS (ESI):**  $m/z$  calcd for  $C_{20}H_{35}N_4^+$   $[M+H]^+$  331.2856, found 331.2856.  $m/z$  calcd for  $C_{13}H_{28}N_4^+$   $[M-Bn+H]^+$  241.2387, found 241.2386.

**Compound 7:** Compound **6** (1.45 g, 3.2 mmol) was dissolved in methanol (50 mL) with Pd/C 10% (0.80 g, 0.8 mmol). The mixture was stirred at 35 °C under  $H_2$  atmosphere for 7 days. The palladium was removed by filtration on celite and the solvent was evaporated to give compound **7** as brown oil (1.10 g, 95 %).

**$^{13}C$  Jmod NMR (75 MHz,  $CDCl_3$ , 298 K):**  $\delta$  = [58.2, 56.8, 55.4, 54.7, 53.9, 53.4, 51.2, 49.9, 46.4, 44.2] ( $CH_2$ - $\alpha$ -N), 44.9 (N- $CH_3$ ), [26.7, 22.2] ppm ( $CH_2$ - $\beta$ -N).

**$^1H$  NMR (300 MHz,  $CDCl_3$ , 298 K):**  $\delta$  = 10.81 (br s, 1H, acidic H), 3.38-3.32 (m, 1H), 3.21-3.16 (m, 1H), 2.97-2.61 (m, 13H), 2.53-2.34 (m, 5H), 2.41 (s, 3H), 1.86-1.50 ppm (m, 4H).

**HRMS (ESI):**  $m/z$  calcd for  $C_{13}H_{29}N_4^+$   $[M+H]^+$  241.2387, found 241.2386, calcd for  $C_{13}H_{30}N_4^{2+}$   $[M+2H]^{2+}$  121.1229, found 121.1230.

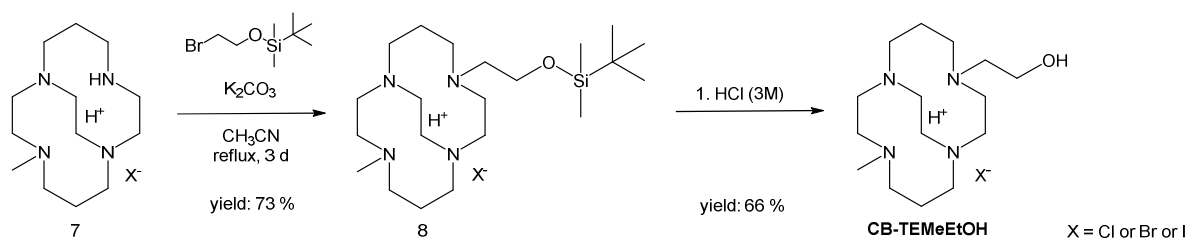

**Compound 8:** A solution of 2-Bromo-1-tert-butyl-dimethylsilyloxy-ethane (0.24 g, 1.0 mmol) in  $CH_3CN$  (10 mL) was slowly added on a solution of **7** (0.20 g, 0.5 mmol) in  $CH_3CN$  (20 mL) with  $K_2CO_3$  (0.42 g, 3.0 mmol). Then the solution was stirred at reflux for 3 days.  $K_2CO_3$  was filtered out and solvent was evaporated under reduced pressure. The mixture was purified on silica column ( $CH_2Cl_2/MeOH.NH_3$  (7N) 98/2 to 90/10) to give compound **8** as a brown oil (0.16 g, 73 %).

**<sup>13</sup>C Jmod NMR (75 MHz, CDCl<sub>3</sub>, 298 K)** :  $\delta$  = [60.1, 58.7, 58.3, 55.9, 55.2, 54.5, 54.2, 54.1, 54.1, 52.3, 50.9, 49.9] (CH<sub>2</sub>- $\alpha$ -N, CH<sub>2</sub>- $\alpha$ -OH), 42.1 (N-CH<sub>3</sub>), 25.7 (C(CH<sub>3</sub>)<sub>3</sub>), [25.1, 23.3] (CH<sub>2</sub>- $\beta$ -N), 18.1 (Si-C<sub>q</sub>), -5.4 ppm (Si-CH<sub>3</sub>).

**<sup>1</sup>H NMR (300 MHz, CDCl<sub>3</sub>, 298K)** :  $\delta$  = 3.90-3.82 (m, 1H), 3.78-3.67 (m, 2H), 3.49-3.33 (m, 3H), 3.25-3.20 (m, 1H), 3.17-3.12 (m, 1H), 3.09-3.05 (m, 1H), 3.03-2.92 (m, 7H), 2.86-2.76 (m, 5H), 2.68-2.64 (m, 2H), 2.59-2.55 (m, 1H), 2.34 (s, 3H, CH<sub>3</sub>), 1.80-1.77 (m, 2H), 1.64-1.60 (m, 2H), 0.87 (s, 9H, Si-C(CH<sub>3</sub>)<sub>3</sub>), 0.04 ppm (s, 6H, Si-CH<sub>3</sub>).

**HRMS (ESI)**: *m/z* calcd for C<sub>21</sub>H<sub>47</sub>N<sub>4</sub>OSi<sup>+</sup> [M+H]<sup>+</sup> 399.3514, found 399.3514, calcd for C<sub>21</sub>H<sub>48</sub>N<sub>4</sub>OSi<sup>2+</sup> [M+2H]<sup>2+</sup> 200.1793, found 200.1798, calcd for C<sub>15</sub>H<sub>32</sub>N<sub>4</sub><sup>2+</sup> [M-OTBDMS]<sup>2+</sup> 134.1308, found 134.1310.

**CB-TEMeEtOH**: Compound **8** (0.30 g, 0.8 mmol) was dissolved in HCl (3 M, 15 mL) and the mixture was stirred at reflux 2 h. The aqueous layer was washed with Et<sub>2</sub>O (3 x 20 mL) and evaporated under reduced pressure. At 0°C, NaOH solution (3 M, 10mL) was added and the aqueous layer was extracted with CHCl<sub>3</sub> (3 x 30mL). Organic layers were combined, dried over MgSO<sub>4</sub> and evaporated under reduce pressure to give **CB-TEMeEtOH** as brown solid (0.16 g, 66 %).

**<sup>13</sup>C Jmod NMR (75 MHz, CDCl<sub>3</sub> , 298 K)**:  $\delta$  = [58.8, 58.7, 57.9, 56.7, 56.4, 54.4, 54.2, 53.5, 53.2, 52.8, 52.3, 51.0] (CH<sub>2</sub>- $\alpha$ -N, CH<sub>2</sub>- $\alpha$ -OH), 42.2 (N-CH<sub>3</sub>), [24.6, 23.7] ppm (CH<sub>2</sub>- $\beta$ -N).

**<sup>1</sup>H NMR (300 MHz, CDCl<sub>3</sub>, 298 K)**:  $\delta$  = 3.84-3.63 (m, 3H), 3.34-3.15 (m, 4H), 3.04-2.98 (m, 4H), 2.92-2.87 (m, 2H), 2.81-2.78 (m, 2H), 2.72-2.60 (m, 8H), 2.25 (s, 3H, CH 3 ), 1.68-1.54 ppm (m, 4H).

**HRMS (ESI)**: *m/z* calcd for C<sub>15</sub>H<sub>33</sub>N<sub>4</sub>O<sup>+</sup> [M+H]<sup>+</sup> 285.2649, found 285.2651, calcd for C<sub>15</sub>H<sub>34</sub>N<sub>4</sub>O<sup>2+</sup> [M+2H]<sup>2+</sup> 143.1361, found 143.1361.

## Synthesis and characterization of cyclam complexes with copper(II) and zinc(II)

### 5. Characterization of Copper(II) 2-(1,4,8,11-tetraazacyclotetradecan-1-yl)ethan-1-ol dichloride [Cu(TE1EtOH)]Cl<sub>2</sub>

**TE1EtOH** (48.9 mg, 0.200 mmol), CuCl<sub>2</sub> (29.6 mg, 0.220 mmol).

Complex was obtained as purple powder (47mg, 60 %).

**HRMS (ESI)** (positive, H<sub>2</sub>O): *m/z* calcd. for [C<sub>12</sub>H<sub>28</sub>CuN<sub>4</sub>O]<sup>2+</sup>, 153.5774, found 153.5776 [Cu(TE1EtOH)]<sup>2+</sup>, calcd. for [C<sub>12</sub>H<sub>27</sub>CuN<sub>4</sub>O]<sup>+</sup>, 306.1475, found 306.1473 [Cu(TE1EtOH)-H]<sup>+</sup>.

### 6. Characterization of Zinc(II) 2-(1,4,8,11-tetraazacyclotetradecan-1-yl)ethan-1-ol dichloride [Zn(TE1EtOH)]Cl<sub>2</sub>

**TE1EtOH** (48.9 mg, 0.200 mmol), ZnCl<sub>2</sub> (30.0 mg, 0.220 mmol).

Complex was obtained as white powder (43 mg, 55 %).

**HRMS (ESI)** (positive, H<sub>2</sub>O): *m/z* calcd. for [C<sub>12</sub>H<sub>28</sub>N<sub>4</sub>OZn]<sup>2+</sup>, 154.0772, found 154.0772 [Zn(TE1EtOH)]<sup>2+</sup>, calcd. for [C<sub>12</sub>H<sub>27</sub>N<sub>4</sub>OZn]<sup>+</sup>, 307.1471, found 307.1408 [Zn(TE1EtOH)-H]<sup>+</sup>.

**<sup>1</sup>H NMR (500 MHz, D<sub>2</sub>O, 298 K)**: complex mixture of 3 forms δ = 4.00-3.83 (m, 2H, CH<sub>2</sub>-α-OH), 3.33-2.43 (m, 18H, CH<sub>2</sub>-α-N), 2.0-1.64 ppm (m, 4H, CH<sub>2</sub>-β-N).

**<sup>13</sup>C NMR (125 MHz, D<sub>2</sub>O, 298 K)**: Isomer 1: δ = [63.0, 61.5, 61.3, 57.5, 53.3, 52.8, 51.8, 50.6, 50.4, 48.4] (CH<sub>2</sub>-α-N, CH<sub>2</sub>-α-OH), [30.6, 28.2] ppm (CH<sub>2</sub>-β-N). Isomer 2: δ = [59.7, 59.0, 57.5, 54.4, 53.7, 52.8, 51.6, 50.8, 48.2, 47.5] (CH<sub>2</sub>-α-N, CH<sub>2</sub>-α-OH), [27.3, 26.5] ppm (CH<sub>2</sub>-β-N). Isomer 3: δ = [59.9, 58.9, 54.5, 54.2, 53.7, 53.5, 51.9, 50.0, 48.7, 48.0] (CH<sub>2</sub>-α-N, CH<sub>2</sub>-α-OH), [29.9, 26.7] ppm (CH<sub>2</sub>-β-N).



7. Characterization of Copper(II) 2-(4,8,11-trimethyl-1,4,8,11-tetraazacyclotetradecan-1-yl)ethan-1-ol dichloride [Cu(TE3MeEtOH)]Cl<sub>2</sub>

**TE3MeEtOH** (57.2 mg, 0.200 mmol), CuCl<sub>2</sub> (29.6 mg, 0.220 mmol).

Complex was obtained as a blue powder (55.4 mg, 64 %).

**HRMS (ESI)** (positive, H<sub>2</sub>O): *m/z* calcd. for [C<sub>15</sub>H<sub>34</sub>CuN<sub>4</sub>O]<sup>2+</sup>, 174.6009, found 174.6014 [Cu(TE3MeEtOH)]<sup>2+</sup>, calcd. for [C<sub>15</sub>H<sub>34</sub>CuN<sub>4</sub>O]<sup>+</sup>, 349.2023, found 349.2018 [Cu(TE3MeEtOH)]<sup>+</sup>.

8. Characterization of Zinc(II) 2-(4,8,11-trimethyl-1,4,8,11-tetraazacyclotetradecan-1-yl)ethan-1-ol dichloride [Zn(TE3MeEtOH)]Cl<sub>2</sub>

**TE3MeEtOH** (57.2 mg, 0.200 mmol), ZnCl<sub>2</sub> (30.0 mg, 0.220 mmol).

Complex was obtained as white powder (61 mg, 70 %).

**HRMS (ESI)** (positive, H<sub>2</sub>O): *m/z* calcd. for [C<sub>15</sub>H<sub>34</sub>N<sub>4</sub>OZn]<sup>2+</sup>, 175.1007, found 175.1014 [Zn(TE3MeEtOH)]<sup>2+</sup>, calcd. for [C<sub>15</sub>H<sub>33</sub>N<sub>4</sub>OZn]<sup>+</sup>, 349.1940, found 349.1942 [Zn(TE3MeEtOH)-H]<sup>+</sup>, calcd. for [C<sub>15</sub>H<sub>33</sub>ClN<sub>4</sub>OZn]<sup>+</sup>, 385.1707, found 385.1707 [Zn(TE3MeEtOH)+Cl]<sup>+</sup>.

**<sup>1</sup>H NMR (500 MHz, D<sub>2</sub>O, 298 K):** δ = 4.15-4.04 (m, 2H, CH<sub>2</sub>-α-OH), 3.45 (td, J=13.0, 6.4 Hz, 1H), 3.29-3.20 (m, 7H), 3.12-3.07 (m, 1H), 2.94-2.92 (m, 4H), 2.61 (s, 3H, CH<sub>3</sub>), 2.53 (s, 3H, CH<sub>3</sub>), 2.51 (s, 3H, CH<sub>3</sub>), 2.61-2.51 (m, 5H), 2.43-2.36 (m, 2H, CH<sub>2</sub>-β-N), 1.77-1.71 ppm (m, 2H, CH<sub>2</sub>-β-N).

**<sup>13</sup>C NMR (125 MHz, D<sub>2</sub>O, 298 K):** δ = [65.0, 64.0, 62.3, 60.1, 59.6, 59.5, 59.1, 53.9, 52.4] (CH<sub>2</sub>-α-N), 59.9 (CH<sub>2</sub>-α-OH), [48.1, 44.4, 43.6] (N-CH<sub>3</sub>), [23.5, 23.1] ppm (CH<sub>2</sub>-β-N).

9. Characterization of Copper(II) 2-(1,4,8,11-tetraazabicyclo[6.6.2]hexadecan-4-yl)ethan-1-ol dichloride [Cu(CB-TE1EtOH)]Cl<sub>2</sub>

**CB-TE1EtOH** (22 mg, 0.081 mmol), CuCl<sub>2</sub> (13.12 mg, 0.098 mmol).

Complex was obtained as a blue powder (31.3 mg, 95 %).

**HRMS (ESI)** (positive, H<sub>2</sub>O): *m/z* calcd. for [C<sub>14</sub>H<sub>30</sub>CuN<sub>4</sub>O]<sup>2+</sup>, 166.5852, found 166.5858 [Cu(CB-TE1EtOH)]<sup>2+</sup>, calcd. for [C<sub>14</sub>H<sub>29</sub>CuN<sub>4</sub>O]<sup>+</sup>, 332.1631, found 332.1635 [Cu(CB-TE1EtOH)-H]<sup>+</sup>, calcd. for [C<sub>14</sub>H<sub>30</sub>ClCuN<sub>4</sub>O]<sup>+</sup>, 368.1398, found 368.1400 [Cu(CB-TE1EtOH)-Cl]<sup>+</sup>.

#### 10. Characterization of Zinc(II) 2-(1,4,8,11-tetraazabicyclo[6.6.2]hexadecan-4-yl)ethan-1-ol dichloride [Zn(CB-TE1EtOH)]Cl<sub>2</sub>

**CB-TE1EtOH** (16.5 mg, 0.061 mmol), CuCl<sub>2</sub> (10 mg, 0.073 mmol).

Complex was obtained as a beige powder (4.9 mg, 19 %).

**HRMS (ESI)** (positive, H<sub>2</sub>O): *m/z* calcd. for [C<sub>14</sub>H<sub>30</sub>N<sub>4</sub>OZn]<sup>2+</sup>, 167.0850, found 167.0856 [Zn(CB-TE1EtOH)]<sup>2+</sup>, calcd. for [C<sub>14</sub>H<sub>29</sub>N<sub>4</sub>OZn]<sup>+</sup>, 333.1627, found 333.1629 [Cu(CB-TE1EtOH)-H]<sup>+</sup>, calcd. for [C<sub>14</sub>H<sub>30</sub>ClN<sub>4</sub>OZn]<sup>+</sup>, 369.1394, found 369.1397 [Cu(CB-TE1EtOH)-Cl]<sup>+</sup>.

**<sup>1</sup>H NMR (500 MHz, D<sub>2</sub>O, 298 K):** δ = 4.00-3.93 (m, 2H), 3.41-3.33 (m, 1H), 3.30-3.24 (m, 1H), 3.14-2.94 (m, 19H), 2.78-2.71 (m, 2H), 2.66-2.62 (dd, 1H), 2.32-2.18 (m, 2H), 1.72-1.67 (m, 1H), 1.62-1.58 (m, 1H) ppm.

**<sup>13</sup>C NMR (125 MHz, D<sub>2</sub>O, 298 K):** δ = [60.9, 59.8, 59.6, 58.6, 58.4, 57.6, 56.9, 51.6, 51.2, 49.2, 48.9, 41.0] (CH<sub>2</sub>-α-N and CH<sub>2</sub>-α-OH), [23.0, 21.50] ppm (CH<sub>2</sub>-β-N).

#### 11. Characterization of Copper(II) 2-(4-methyl-1,4,8,11-tetraazabicyclo[6.6.2]hexadecane iodide)ethan-1-ol dichloride [Cu(CB-TEMeEtOH)]Cl<sub>2</sub>

**CB-TEMeEtOH.3HCl** (63.5 mg, 0.161 mmol), CuCl<sub>2</sub> (26.0 mg, 0.193 mmol).

Complex was obtained as a blue powder (35.1 mg, 52 %).

**HRMS (ESI)** (positive, H<sub>2</sub>O): *m/z* calcd. for [C<sub>15</sub>H<sub>32</sub>CuN<sub>4</sub>O]<sup>2+</sup>, 173.5931, found 173.5935 [Cu(CB-TEMeEtOH)]<sup>2+</sup>, calcd. for [C<sub>15</sub>H<sub>31</sub>CuN<sub>4</sub>O]<sup>+</sup>, 346.1788, found 346.1784 [Cu(CB-TEMeEtOH)-H]<sup>+</sup>.

12. Characterization of Zinc(II) 2-(4-methyl-1,4,8,11 tetraazabicyclo[6.6.2]hexadecane iodide)ethan-1-ol dichloride  $[\text{Zn}(\text{CB-TEMeEtOH})]\text{Cl}_2$

**CB-TEMeEtOH.3HCl** (63.5 mg, 0.161 mmol),  $\text{ZnCl}_2$  (26.4 mg, 0.193 mmol).

Complex was obtained as beige powder (40.0 mg, 59 %).

**HRMS (ESI)** (positive,  $\text{H}_2\text{O}$ ):  $m/z$  calcd. for  $[\text{C}_{15}\text{H}_{32}\text{N}_4\text{OZn}]^{2+}$ , 174.0928, found 174.0930  $[\text{Zn}(\text{CB-TEMeEtOH})]^{2+}$ , calcd. for  $[\text{C}_{15}\text{H}_{31}\text{N}_4\text{OZn}]^+$ , 347.1784, found 347.1779  $[\text{Zn}(\text{CB-TEMeEtOH})-\text{H}]^+$ , calcd. for  $[\text{C}_{15}\text{H}_{32}\text{ClN}_4\text{OZn}]^+$ , 383.1551, found 383.1555  $[\text{Zn}(\text{CB-TEMeEtOH})+\text{Cl}]^+$ .

**$^1\text{H}$  NMR (500 MHz,  $\text{D}_2\text{O}$ , 298 K)**:  $\delta$  = 3.96-3.93 (m, 2H,  $\text{CH}_2\text{-}\alpha\text{-OH}$ ), 3.37-3.31 (m, 2H), 3.25-3.21 (m, 2 H), 3.12-2.74 (m, 12H), 2.70 (dd,  $J=13.0$ , 4.1 Hz, 1H), 2.63 (dd  $J=15.4$ , 5.3 Hz, 1H), 2.51 (s, 3H,  $\text{CH}_3$ ), 2.41 (dd,  $J=15.2$ , 4.5 Hz, 1H), 2.31-2.22 (m, 2H,  $\text{CH}_2\text{-}\beta\text{-N}$ ), 1.72-1.68 (m, 2H,  $\text{CH}_2\text{-}\beta\text{-N}$ ).

**$^{13}\text{C}$  NMR (125 MHz,  $\text{D}_2\text{O}$ , 298 K)**:  $\delta$  = [63.7, 63.4, 62.6, 62.0, 61.5, 60.8, 58.4, 54.3, 53.8, 53.7, 52.0] ( $\text{CH}_2\text{-}\alpha\text{-N}$ ), 60.8 ( $\text{CH}_2\text{-}\alpha\text{-OH}$ ), 51.3 (N- $\text{CH}_3$ ), [25.8, 25.7] ppm ( $\text{CH}_2\text{-}\beta\text{-N}$ ).

## NMR characterization of cyclam ligands

### 13. $^1\text{H}$ and $^{13}\text{C}$ NMR characterization of TE1EtOH

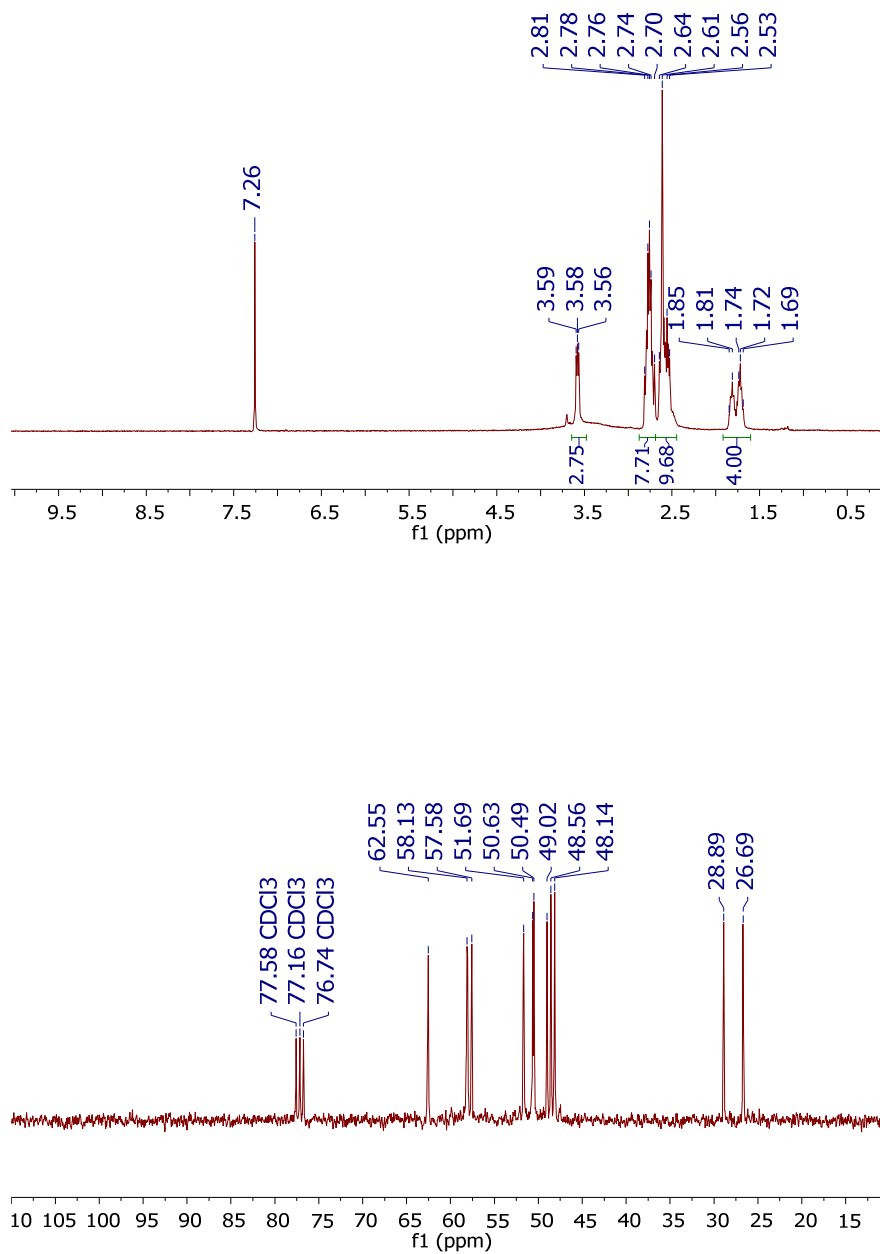

Figure S 1.  $^1\text{H}$  (up) and  $^{13}\text{C}$  (down) NMR (300 and 75 MHz,  $\text{CDCl}_3$ , 298 K) spectra of TE1EtOH.

14.  $^1\text{H}$  and  $^{13}\text{C}$  NMR characterization of TE3MeEtOH

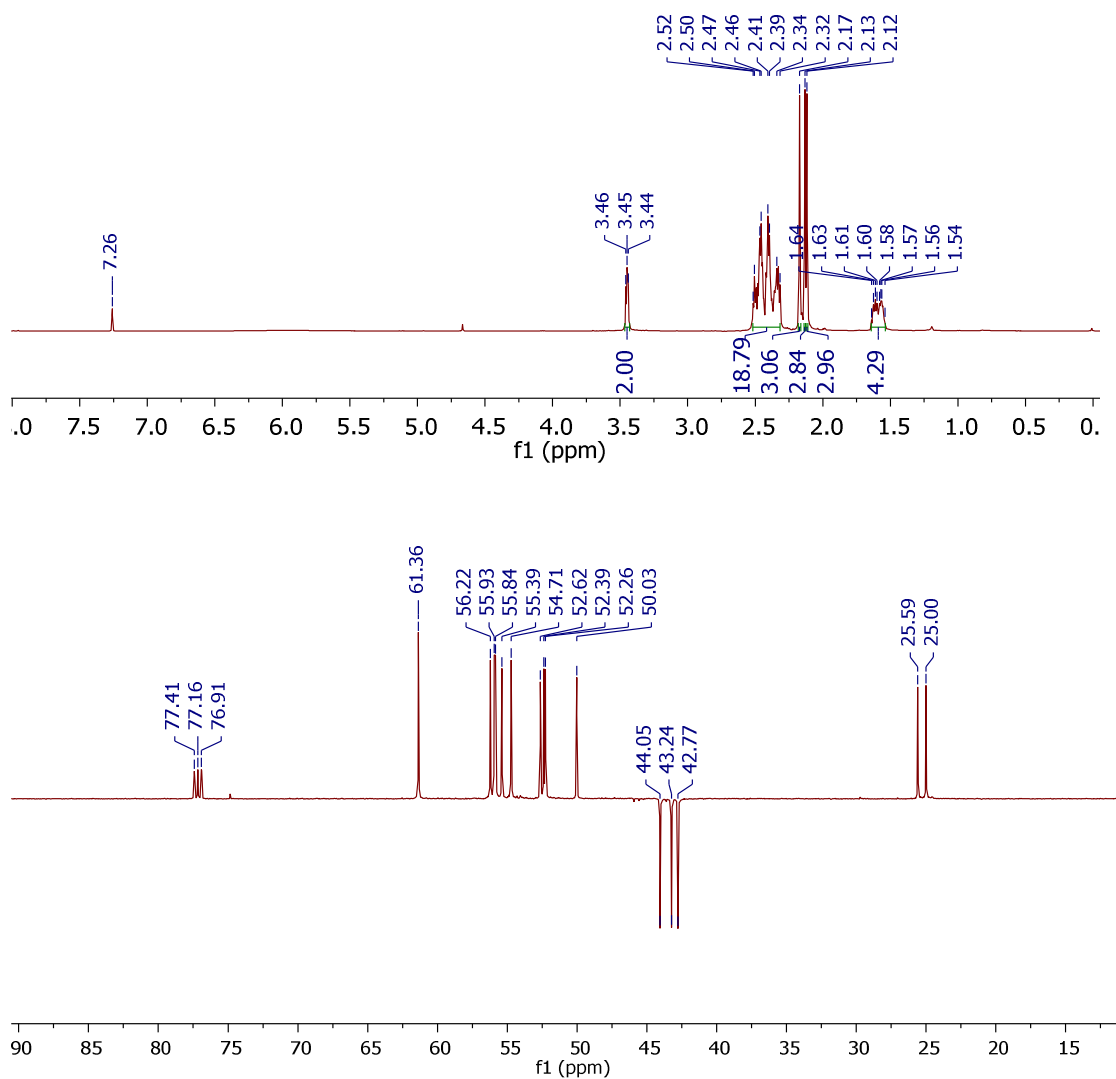

Figure S2. NMR  $^1\text{H}$  (up) and  $^{13}\text{C}$  Jmod (down) (500 and 125 MHz,  $\text{CDCl}_3$ , 298 K) spectra of TE3MeEtOH.

15.  $^1\text{H}$  and  $^{13}\text{C}$  NMR characterization of CB-TEEtOH

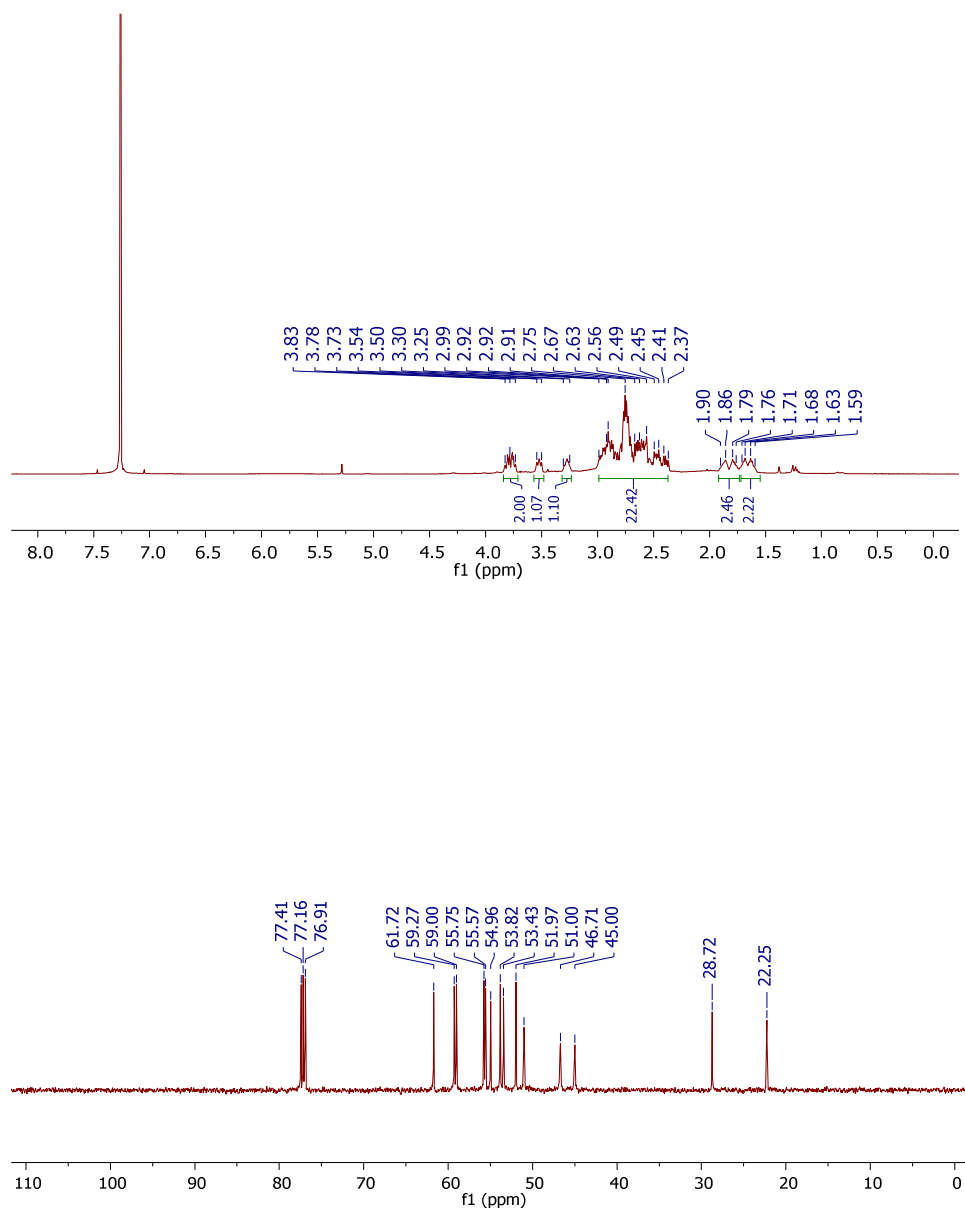

Figure S3.  $^1\text{H}$  (up) and  $^{13}\text{C}$  (down) NMR (500 and 125 MHz,  $\text{CDCl}_3$ , 298 K) spectra of CB-TE1EtOH.

16.  $^1\text{H}$  and  $^{13}\text{C}$  NMR characterization of CB-TEMeEtOH

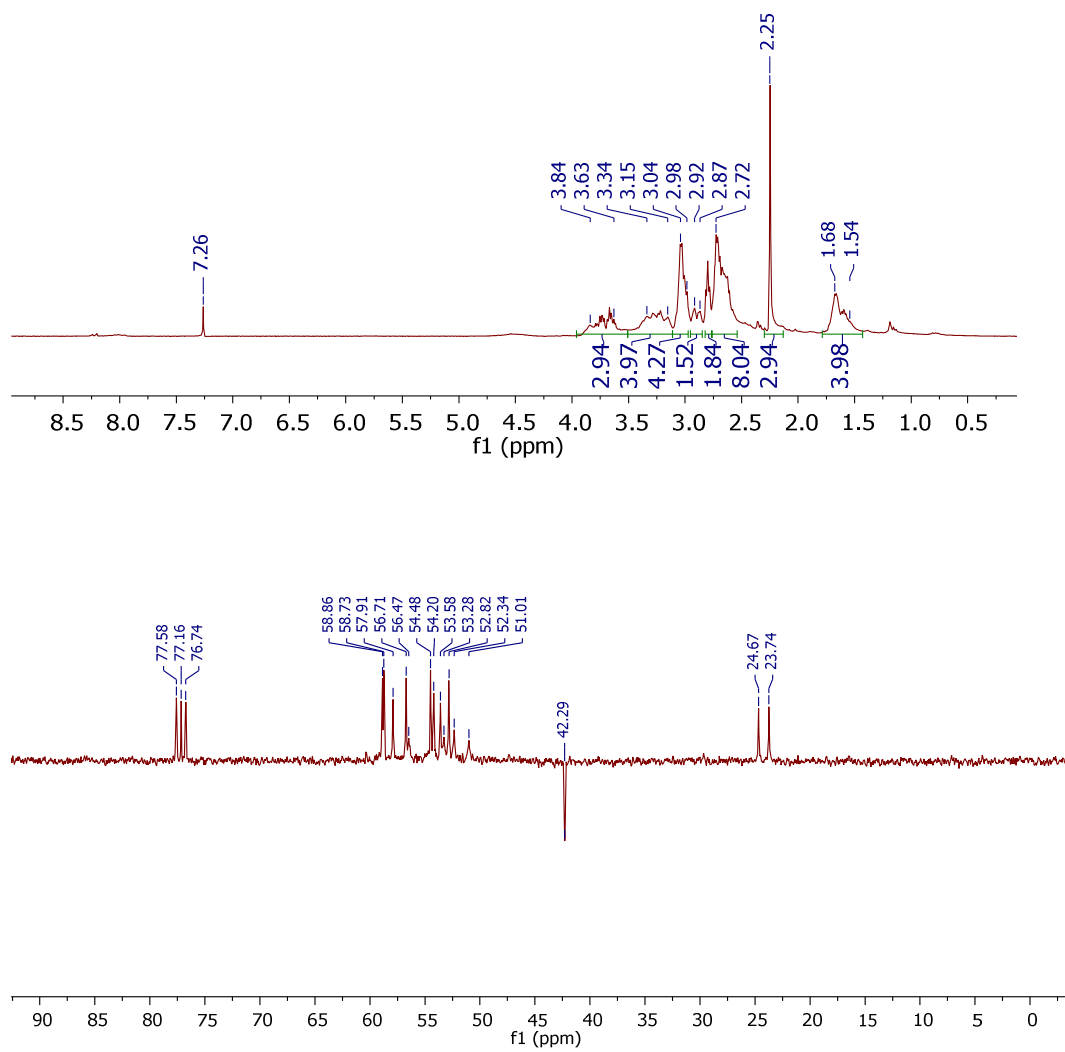

**Figure S4.**  $^1\text{H}$  (up) and  $^{13}\text{C}$  Jmod (down) NMR (300 and 75 MHz,  $\text{CDCl}_3$ , 298 K) spectra of CB-MeTEEtOH.

## HR-MS characterization of cyclam ligands

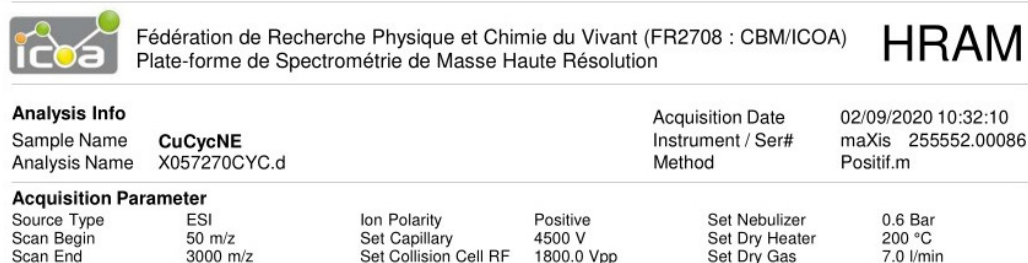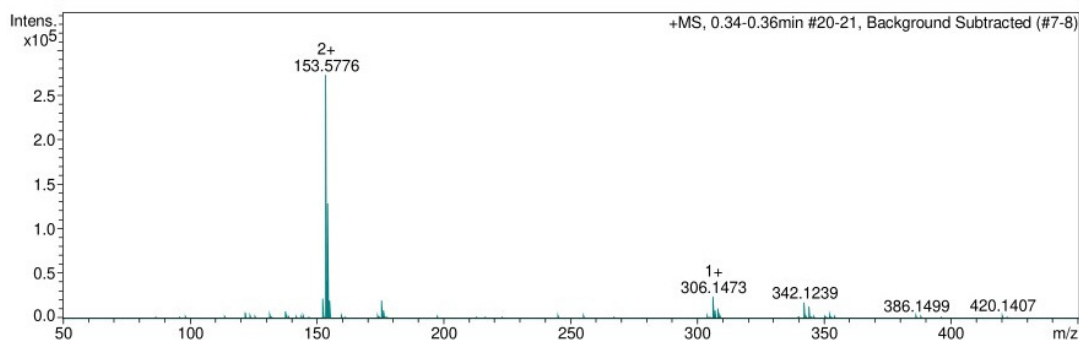

Figure S5. ESI-MS spectrum of [Cu(TE1EtOH)Cl<sub>2</sub>].

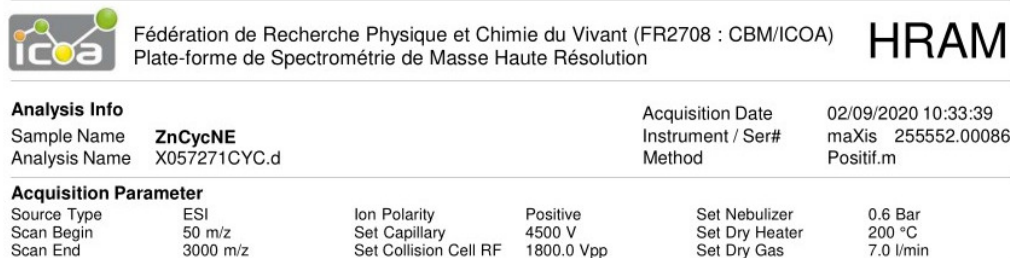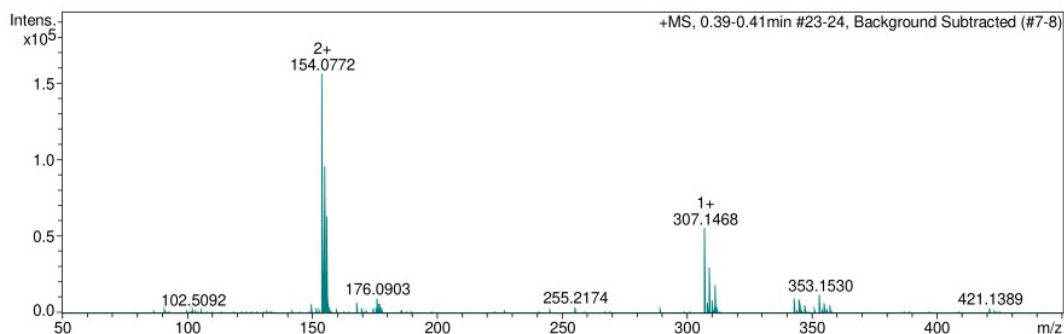

Figure S6. ESI-MS spectrum of [Zn(TE1EtOH)Cl<sub>2</sub>].



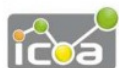

**Analysis Info**

Sample Name **CuTMCNE**  
Analysis Name X057278CYC.d

Acquisition Date 02/09/2020 10:43:46  
Instrument / Ser# maXis 255552.00086  
Method Positif.m

**Acquisition Parameter**

|             |          |                       |            |                |           |
|-------------|----------|-----------------------|------------|----------------|-----------|
| Source Type | ESI      | Ion Polarity          | Positive   | Set Nebulizer  | 0.6 Bar   |
| Scan Begin  | 50 m/z   | Set Capillary         | 4500 V     | Set Dry Heater | 200 °C    |
| Scan End    | 3000 m/z | Set Collision Cell RF | 1800.0 Vpp | Set Dry Gas    | 7.0 l/min |

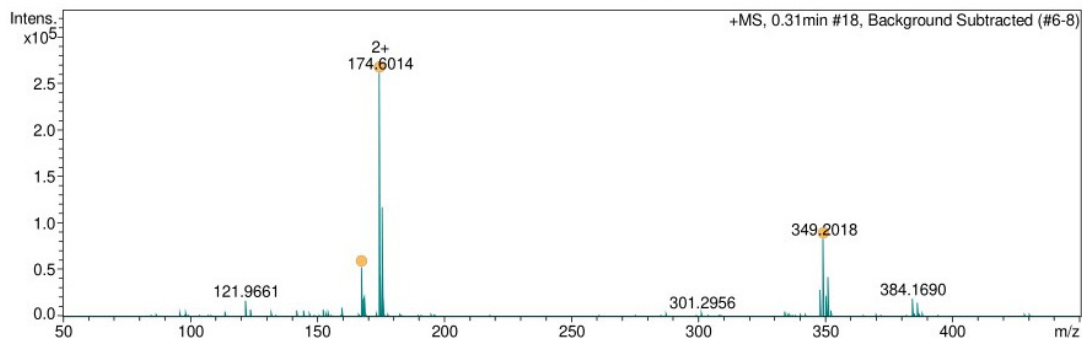

Figure S 7. ESI-MS spectrum of [Cu(TE3MeEtOH)Cl<sub>2</sub>].

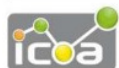

**Analysis Info**

Sample Name **ZnTMCNE**  
Analysis Name X057279CYC.d

Acquisition Date 02/09/2020 10:45:13  
Instrument / Ser# maXis 255552.00086  
Method Positif.m

**Acquisition Parameter**

|             |          |                       |            |                |           |
|-------------|----------|-----------------------|------------|----------------|-----------|
| Source Type | ESI      | Ion Polarity          | Positive   | Set Nebulizer  | 0.6 Bar   |
| Scan Begin  | 50 m/z   | Set Capillary         | 4500 V     | Set Dry Heater | 200 °C    |
| Scan End    | 3000 m/z | Set Collision Cell RF | 1800.0 Vpp | Set Dry Gas    | 7.0 l/min |

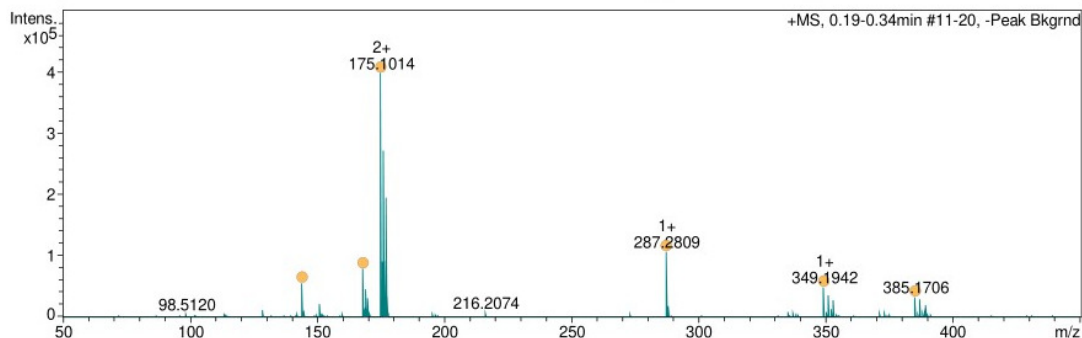

Figure S8. ESI-MS spectrum of [Zn(TE3MeEtOH)Cl<sub>2</sub>].

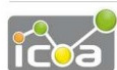

**Analysis Info**

Sample Name **CI2**  
Analysis Name X061724CYC.d

Acquisition Date 07/07/2021 17:08:12  
Instrument / Ser# maXis 255552.00086  
Method Positif.m

**Acquisition Parameter**

|             |          |                       |            |                |           |
|-------------|----------|-----------------------|------------|----------------|-----------|
| Source Type | ESI      | Ion Polarity          | Positive   | Set Nebulizer  | 0.6 Bar   |
| Scan Begin  | 50 m/z   | Set Capillary         | 4500 V     | Set Dry Heater | 200 °C    |
| Scan End    | 3000 m/z | Set Collision Cell RF | 1800.0 Vpp | Set Dry Gas    | 7.0 l/min |

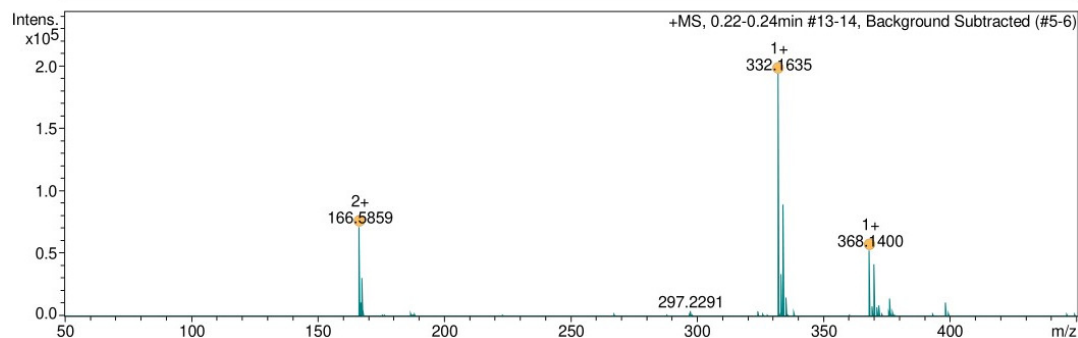

Figure S10. ESI-MS spectrum of  $[\text{Cu}(\text{CB-TE1EtOH})\text{Cl}_2]$ .

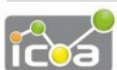

**Analysis Info**

Sample Name **CI2**  
Analysis Name X062771CYC\_7545.d

Acquisition Date 13/10/2021 19:09:25  
Instrument / Ser# maXis 255552.00086  
Method Positif.m

**Acquisition Parameter**

|             |          |                       |            |                |           |
|-------------|----------|-----------------------|------------|----------------|-----------|
| Source Type | ESI      | Ion Polarity          | Positive   | Set Nebulizer  | 0.6 Bar   |
| Scan Begin  | 50 m/z   | Set Capillary         | 4500 V     | Set Dry Heater | 200 °C    |
| Scan End    | 3000 m/z | Set Collision Cell RF | 1800.0 Vpp | Set Dry Gas    | 7.0 l/min |

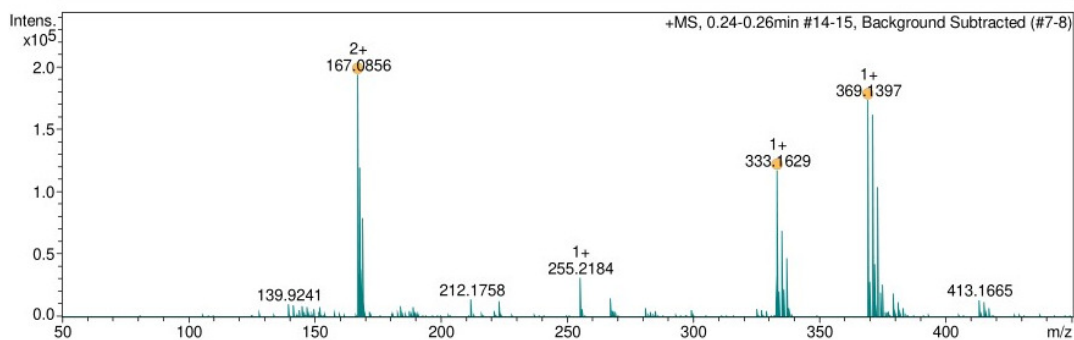

Figure S9. ESI-MS spectrum of  $[\text{Zn}(\text{CB-TE1EtOH})\text{Cl}_2]$ .

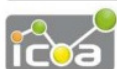

**Analysis Info**

Sample Name **Cu(CB-TEMeEtOH)Cl<sub>2</sub>**  
Analysis Name X059022C.YC.d

Acquisition Date 27/01/2021 11:33:04  
Instrument / Ser# maXis 255552.00086  
Method Positif.m

**Acquisition Parameter**

|             |          |                       |            |                |           |
|-------------|----------|-----------------------|------------|----------------|-----------|
| Source Type | ESI      | Ion Polarity          | Positive   | Set Nebulizer  | 0.6 Bar   |
| Scan Begin  | 50 m/z   | Set Capillary         | 4500 V     | Set Dry Heater | 200 °C    |
| Scan End    | 3000 m/z | Set Collision Cell RF | 1800.0 Vpp | Set Dry Gas    | 7.0 l/min |

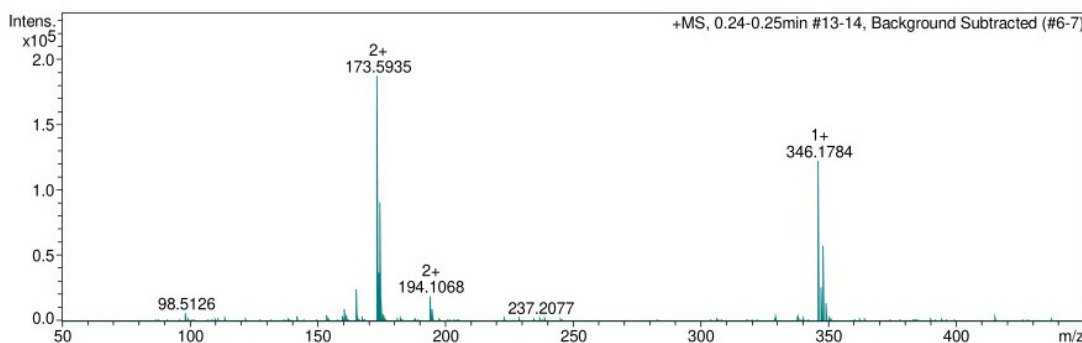

Figure S12. ESI-MS spectrum of [Cu(CB-TEMeEtOH)Cl<sub>2</sub>].

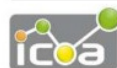

**Analysis Info**

Sample Name **Zn(CB-TEMeEtOH)Cl<sub>2</sub>**  
Analysis Name X059021C.YC.d

Acquisition Date 27/01/2021 11:31:36  
Instrument / Ser# maXis 255552.00086  
Method Positif.m

**Acquisition Parameter**

|             |          |                       |            |                |           |
|-------------|----------|-----------------------|------------|----------------|-----------|
| Source Type | ESI      | Ion Polarity          | Positive   | Set Nebulizer  | 0.6 Bar   |
| Scan Begin  | 50 m/z   | Set Capillary         | 4500 V     | Set Dry Heater | 200 °C    |
| Scan End    | 3000 m/z | Set Collision Cell RF | 1800.0 Vpp | Set Dry Gas    | 7.0 l/min |

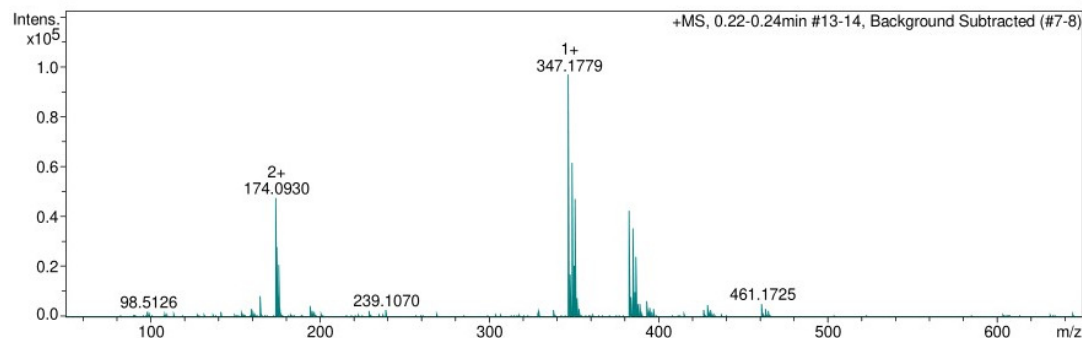

Figure S11. ESI-MS spectrum of [Zn(CB-TEMeEtOH)Cl<sub>2</sub>].

## NMR Characterization of cyclam-Zinc(II) complexes

### 17. 1D and 2D NMR characterization of $[Zn(TE1EtOH)]Cl_2$

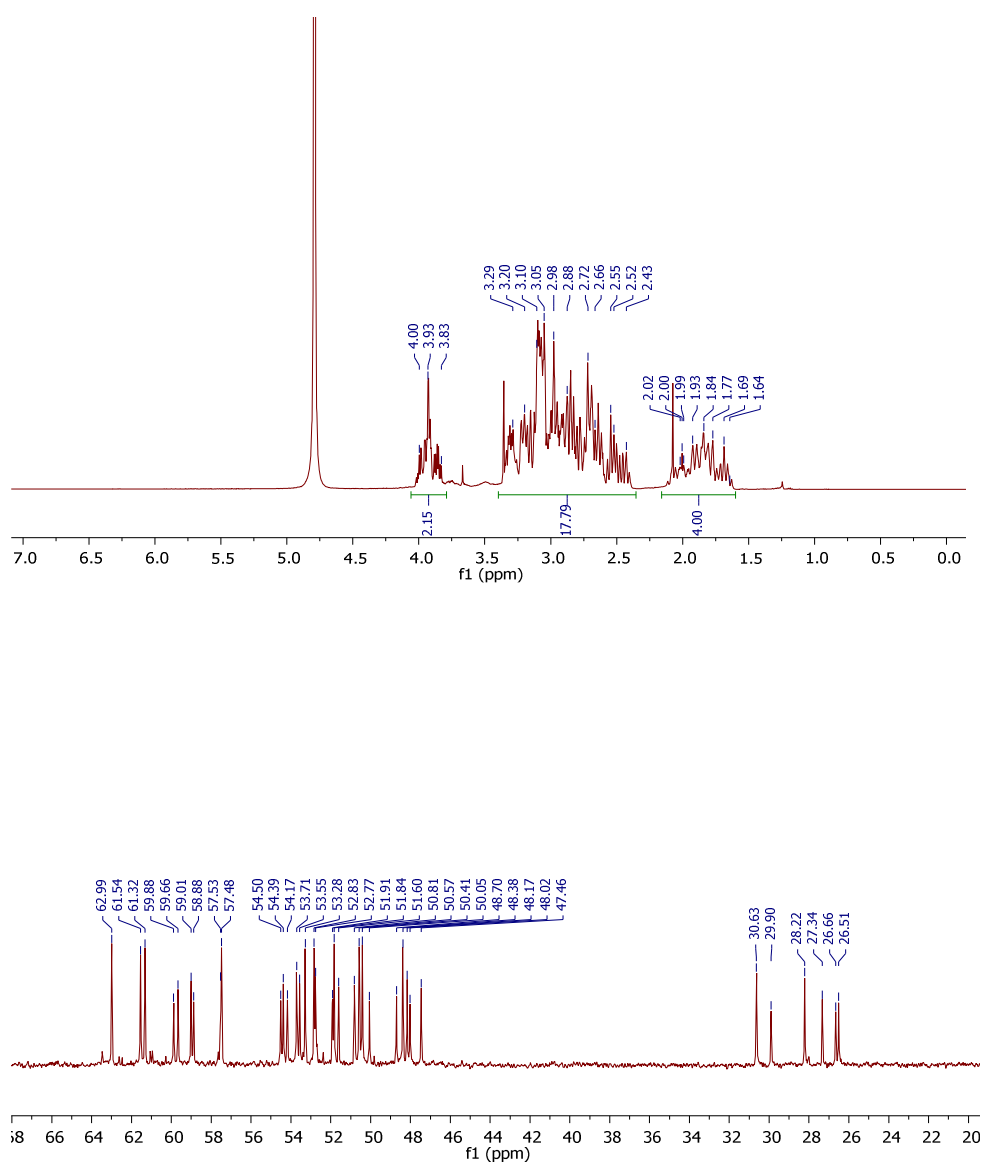

**Figure S13.**  $^1H$  (up) and  $^{13}C$  (down) NMR (500 and 125 MHz,  $D_2O$ , 298 K) spectra of  $[Zn(TE1EtOH)]Cl_2$ .

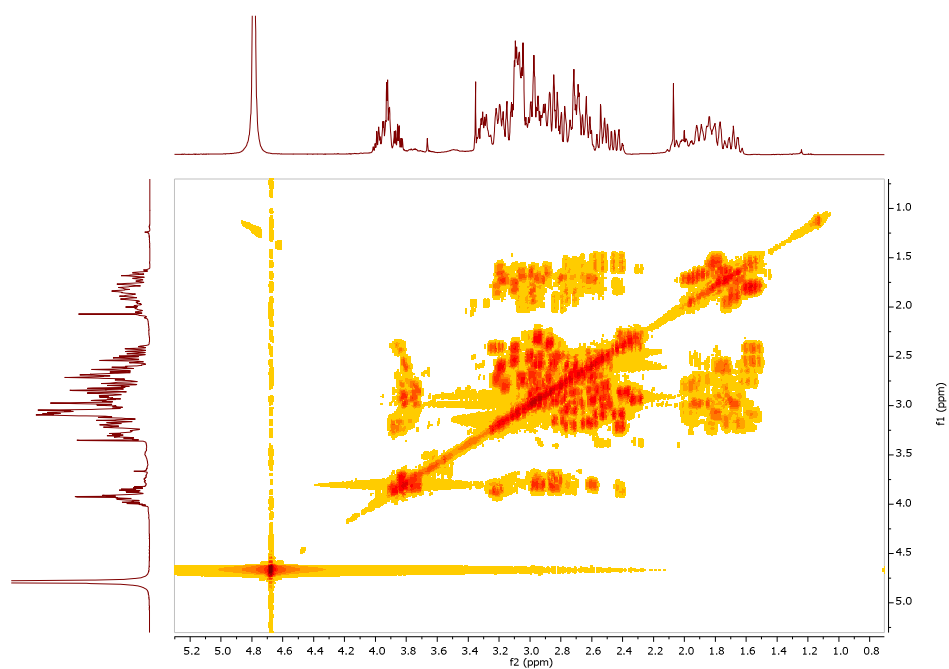

**Figure S14.** 2D COSY  $^1\text{H}$ - $^1\text{H}$  NMR (500 MHz,  $\text{D}_2\text{O}$ , 298 K) spectrum of  $[\text{Zn}(\text{TE1EtOH})]\text{Cl}_2$ .

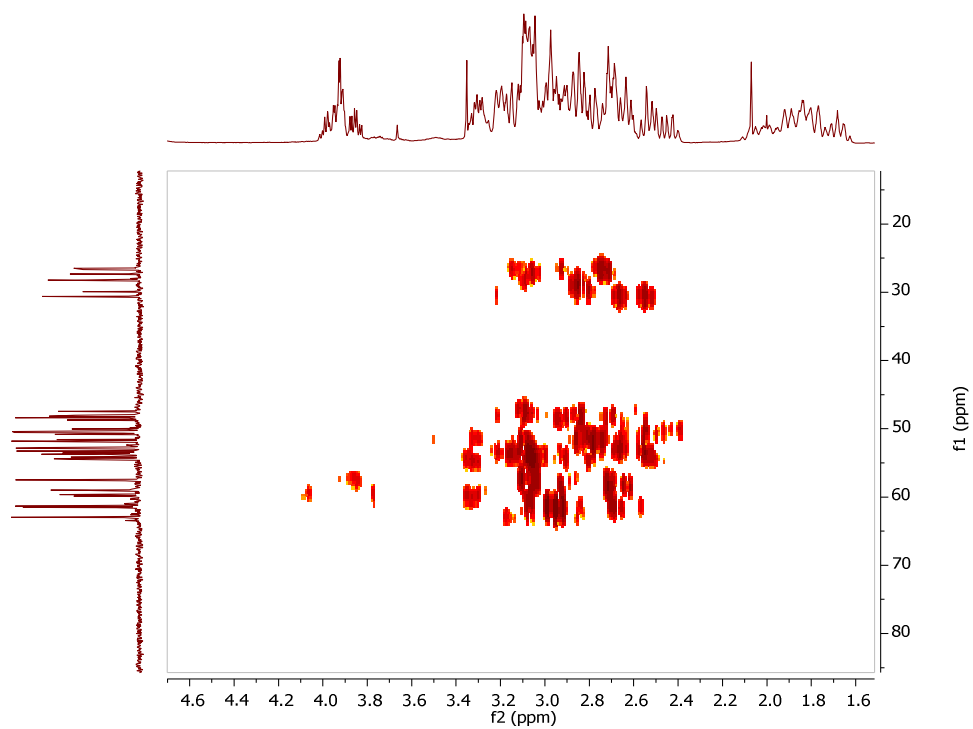

**Figure S15.** 2D HMBC  $^1\text{H}$ - $^{13}\text{C}$  NMR (500 MHz, 125 MHz,  $\text{D}_2\text{O}$ , 298 K) spectrum of  $[\text{Zn}(\text{TE1EtOH})]\text{Cl}_2$ .

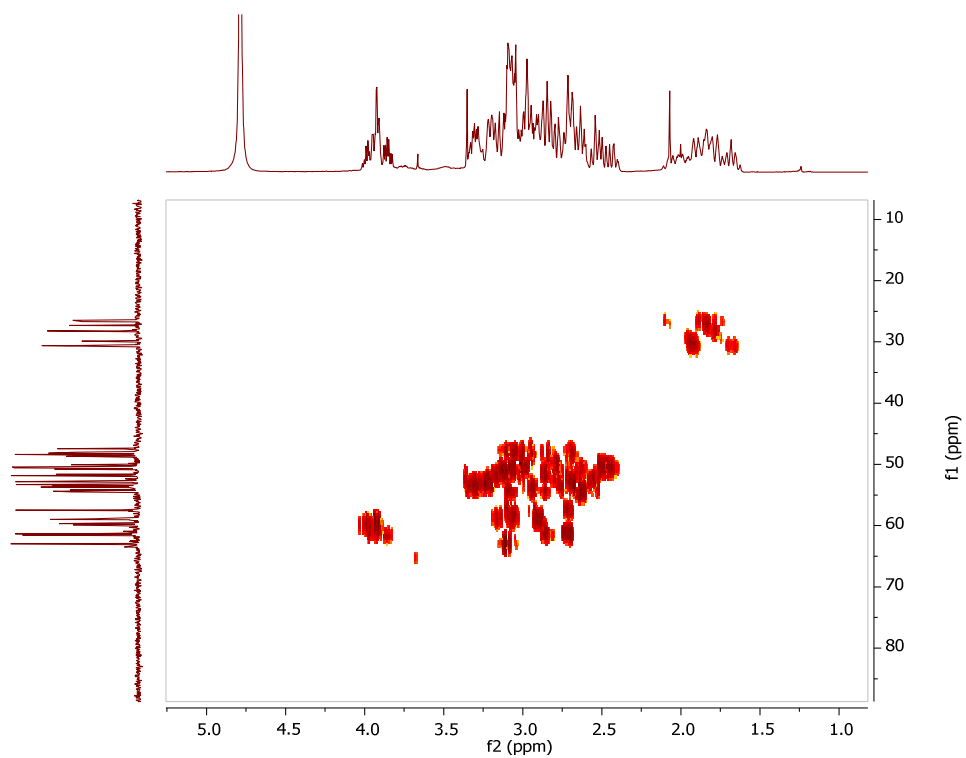

**Figure S16.** 2D HMQC  $^1\text{H}$ - $^{13}\text{C}$  NMR (500 MHz, 125 MHz,  $\text{D}_2\text{O}$ , 298 K) spectrum of  $[\text{Zn}(\text{TE1EtOH})]\text{Cl}_2$ .

### 18. 1D and 2D NMR characterization of $[\text{Zn}(\text{TE3MeEtOH})\text{Cl}_2]$

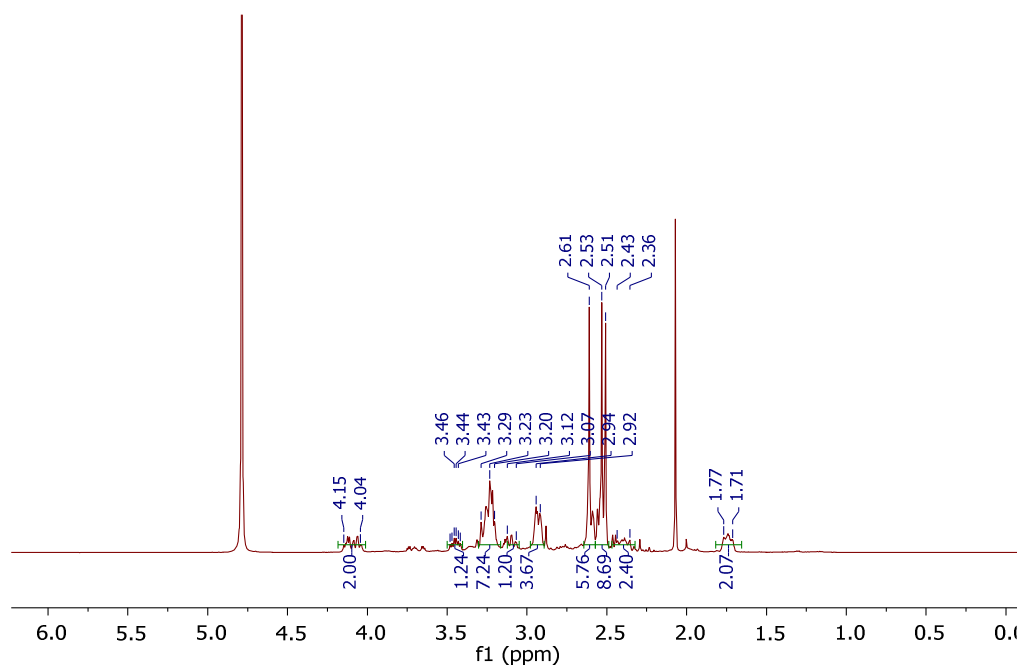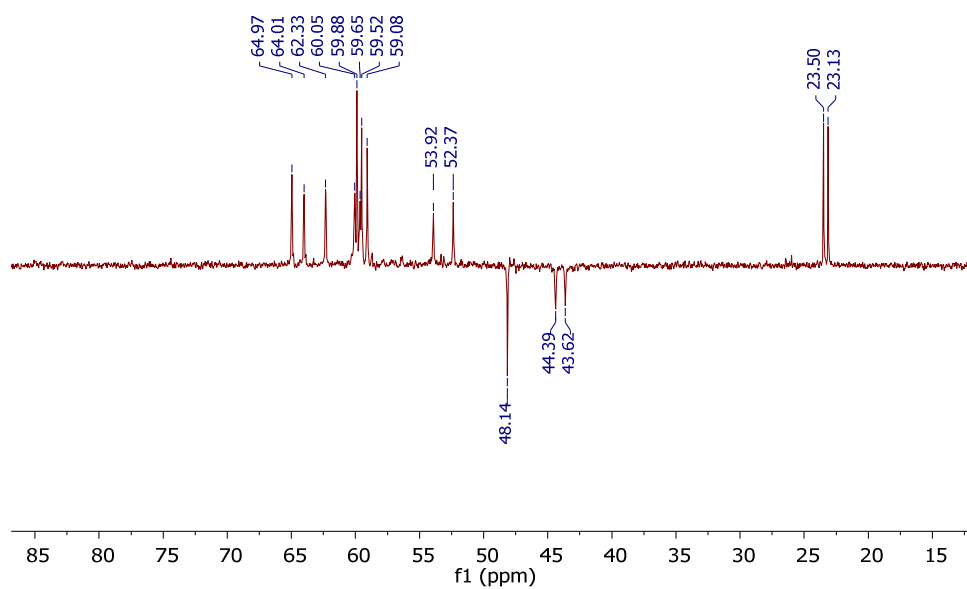

Figure S17.  $^1\text{H}$  (up) and  $^{13}\text{C}$  (down) NMR (500 and 125 MHz,  $\text{D}_2\text{O}$ , 298 K) spectra of  $[\text{Zn}(\text{TE3MeEtOH})\text{Cl}_2]$ .



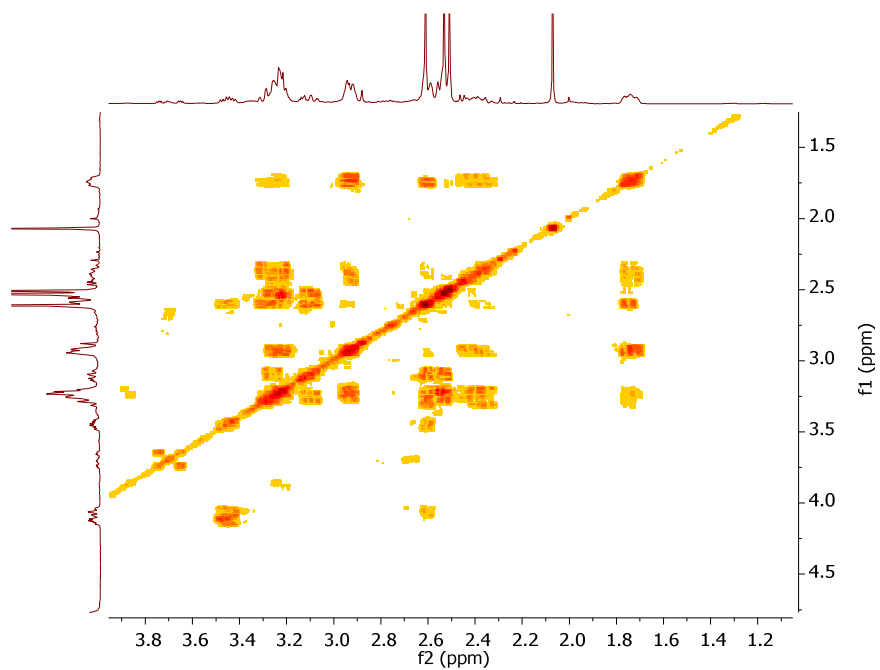

**Figure S18.** 2D COSY  $^1\text{H}$ - $^1\text{H}$  NMR (500 MHz,  $\text{D}_2\text{O}$ , 298 K) spectrum of  $[\text{Zn}(\text{TE3MeEtOH})]\text{Cl}_2$ .

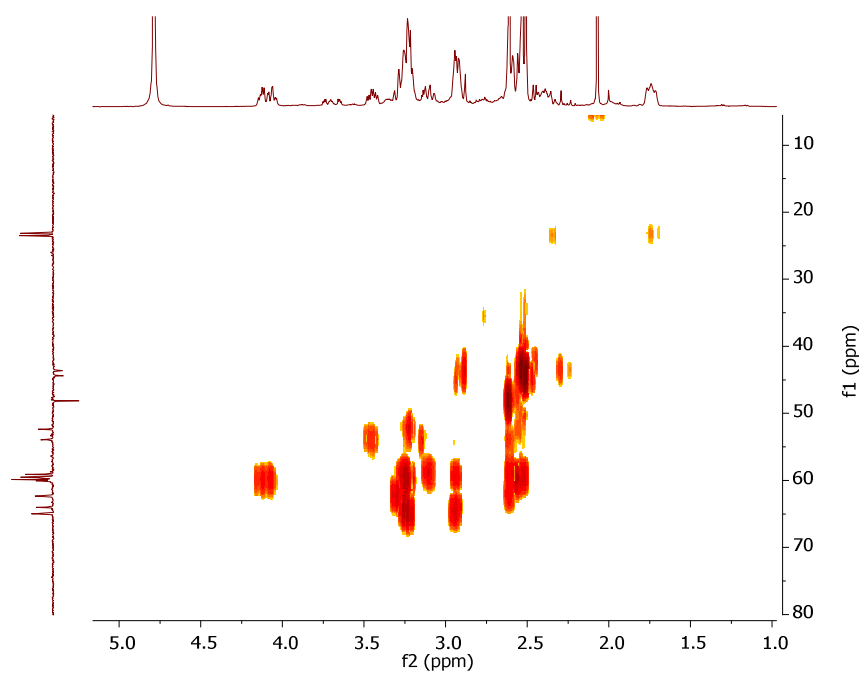

**Figure S19. 2D HMQC  $^1\text{H}$ - $^{13}\text{C}$  NMR (500 MHz, 125 MHz,  $\text{D}_2\text{O}$ , 298 K) spectrum of  $[\text{Zn}(\text{TE3MeEtOH})]\text{Cl}_2$ .**

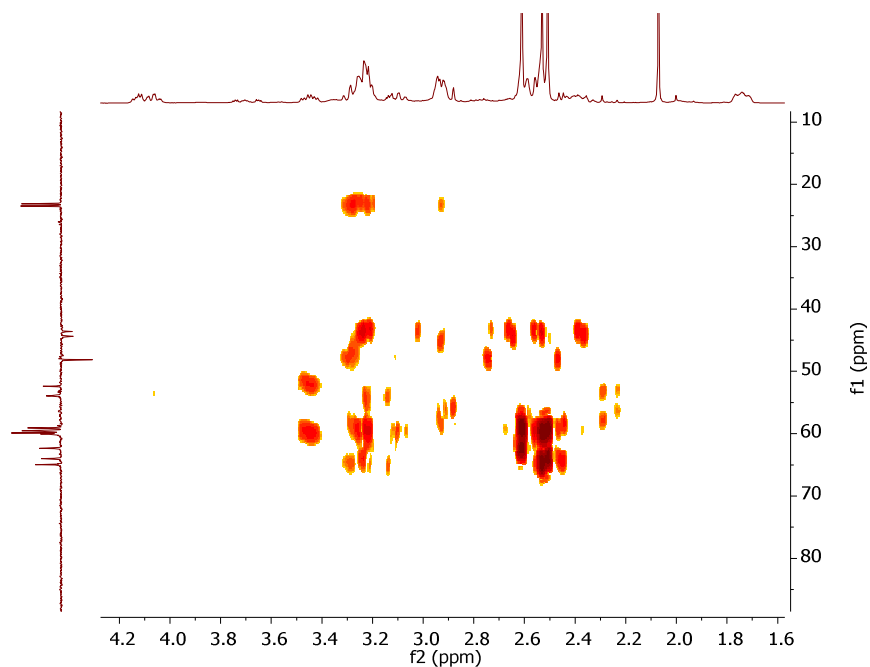

**Figure S20. 2D HMBC  $^1\text{H}$ - $^{13}\text{C}$  NMR (500 MHz, 125 MHz,  $\text{D}_2\text{O}$ , 298 K) spectrum of  $[\text{Zn}(\text{TE3MeEtOH})]\text{Cl}_2$ .**

19. 1D and 2D NMR characterization of  $[\text{Zn}(\text{CB-TE1EtOH})]\text{Cl}_2$

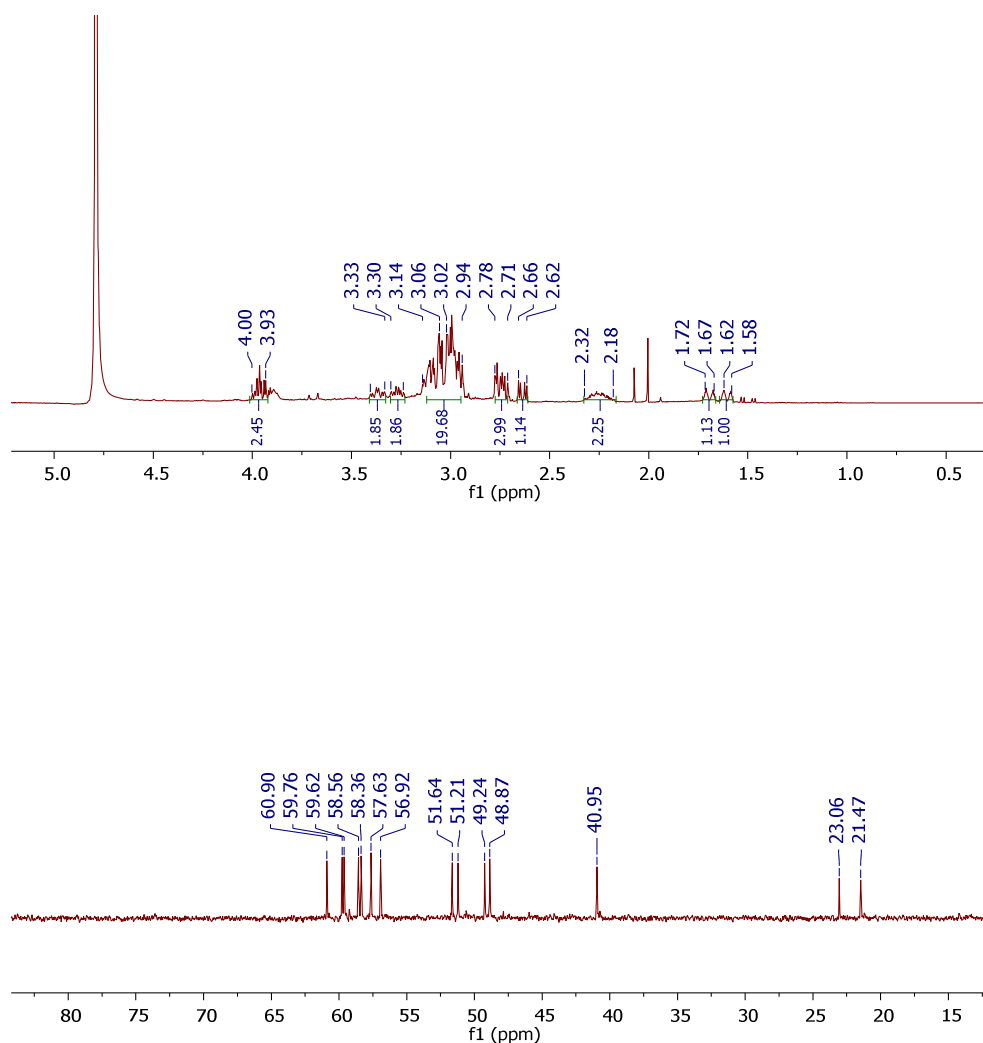

Figure S21.  $^1\text{H}$  (up) and  $^{13}\text{C}$  Jmod (down) NMR (500 and 125 MHz,  $\text{D}_2\text{O}$ , 298 K) spectra of  $[\text{Zn}(\text{CB-TE1EtOH})]\text{Cl}_2$

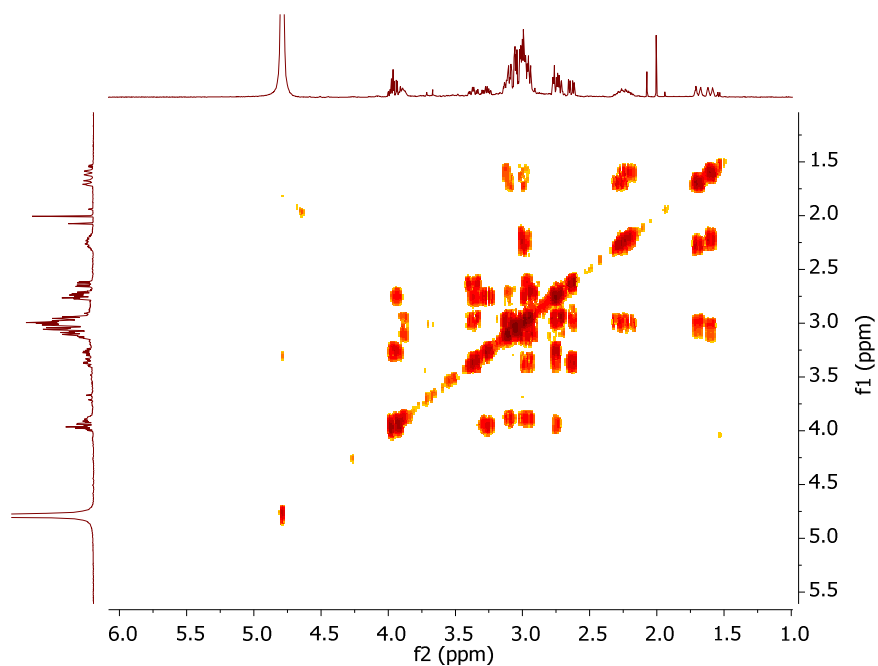

**Figure S 22.** COSY  $^1\text{H}$ - $^1\text{H}$  NMR (500 MHz,  $\text{D}_2\text{O}$ , 298 K) spectrum of  $[\text{Zn}(\text{CB-TE1EtOH})]\text{Cl}_2$ .

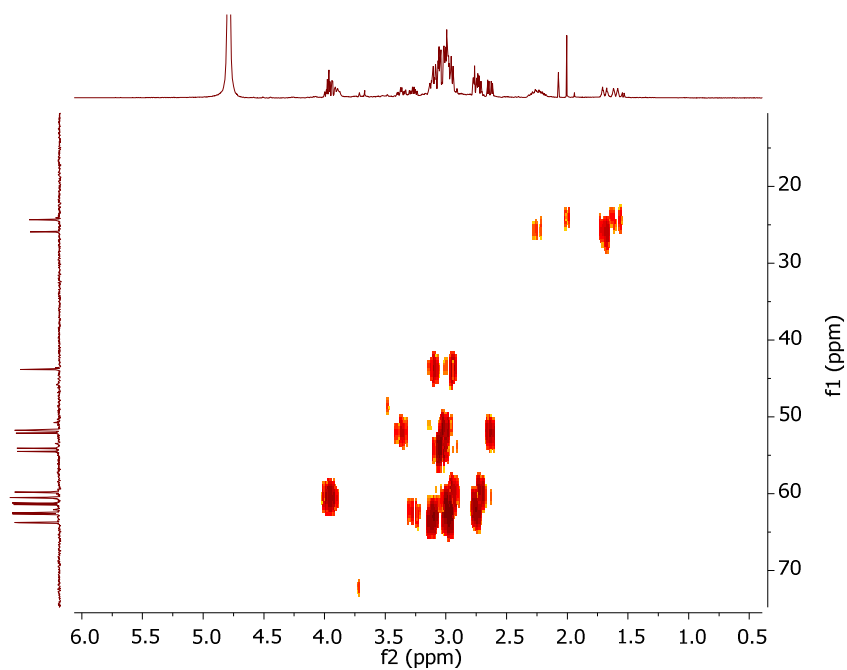

**Figure S 23.** 2D HMQC  $^1\text{H}$ - $^{13}\text{C}$  NMR (500 MHz, 125 MHz,  $\text{D}_2\text{O}$ , 298 K) spectrum of  $[\text{Zn}(\text{CB-TE1EtOH})]\text{Cl}_2$ .

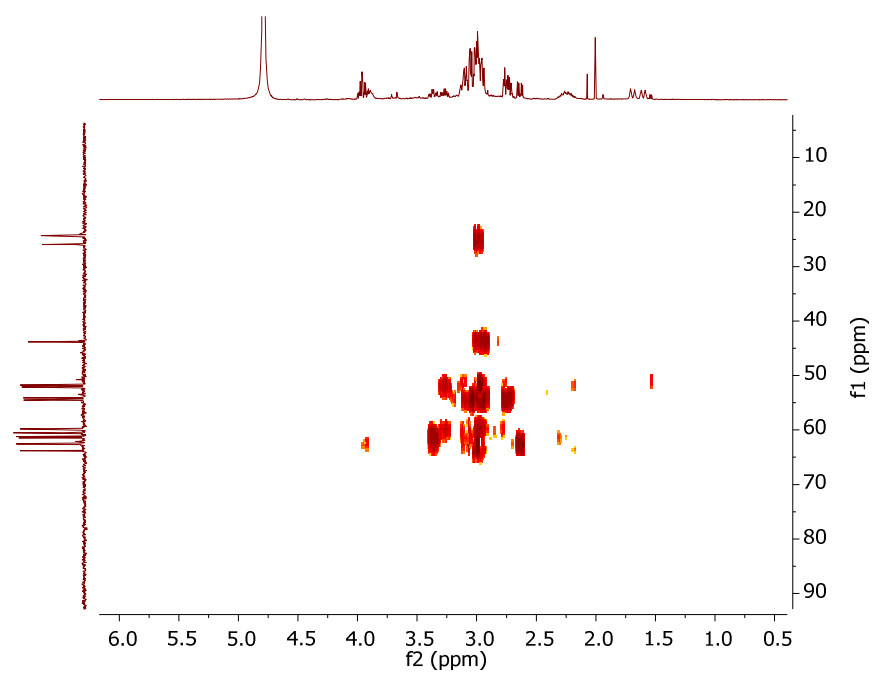

**Figure S 24. 2D HMBC  $^1\text{H}$ - $^{13}\text{C}$  NMR (500 MHz, 125 MHz,  $\text{D}_2\text{O}$ , 298 K) spectrum of  $[\text{Zn}(\text{CB-TE1EtOH})]\text{Cl}_2$ .**

## 20. 1D and 2D NMR characterization of $[\text{Zn}(\text{CB-TEMeEtOH})]\text{Cl}_2$

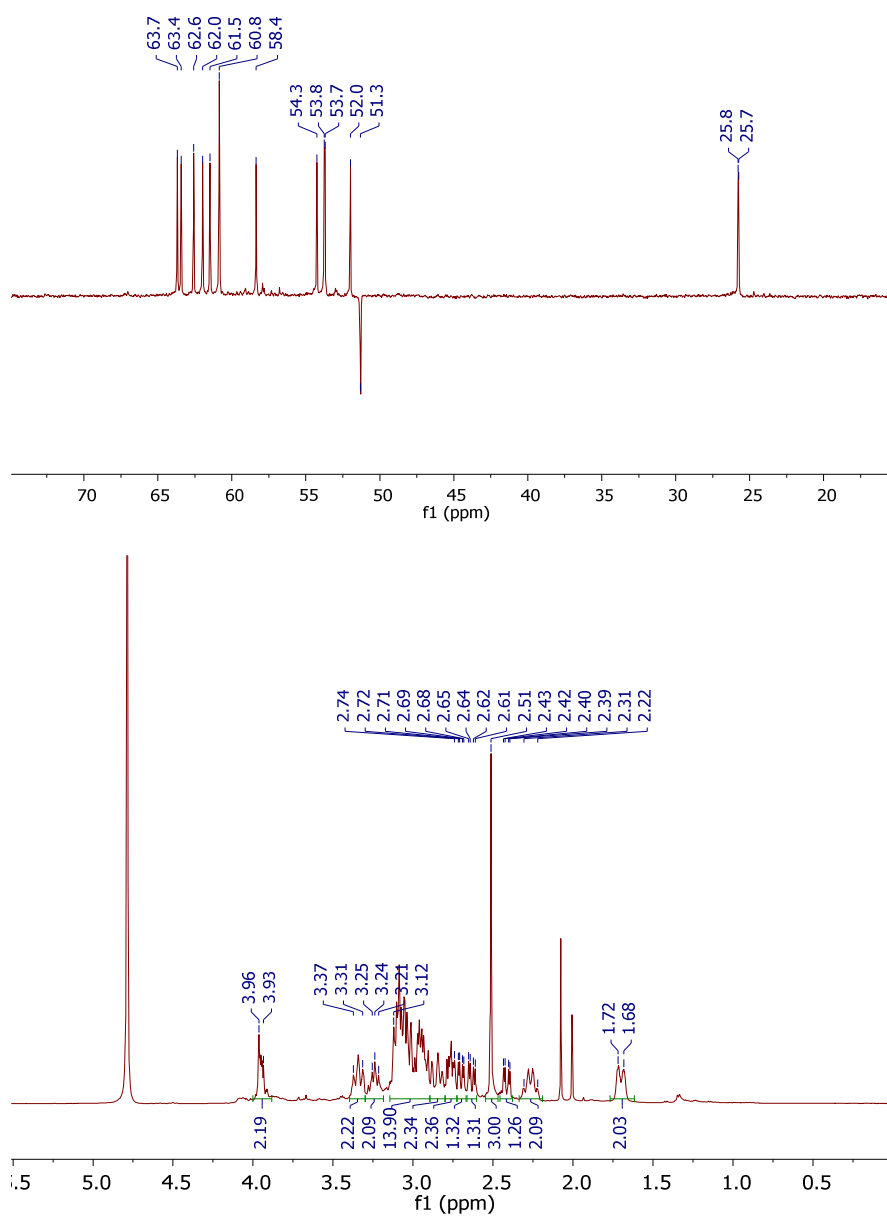

**Figure S25.**  $^1\text{H}$  (up) and  $^{13}\text{C}$  Jmod (down) NMR (500 and 125 MHz,  $\text{D}_2\text{O}$ , 298 K) spectra of  $[\text{Zn}(\text{CB-TEMeEtOH})]\text{Cl}_2$ .

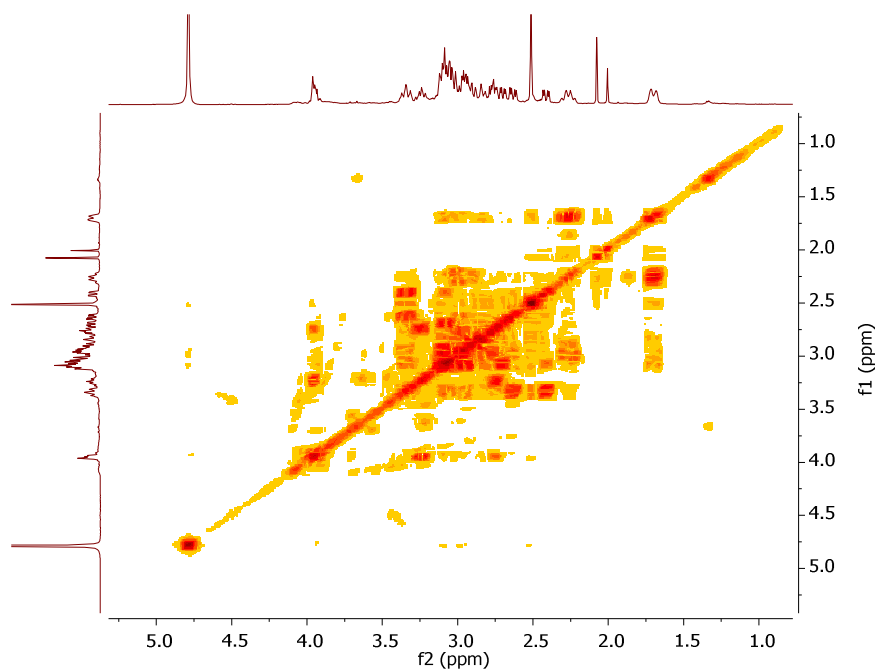

**Figure S26.** 2D COSY  $^1\text{H}$ - $^1\text{H}$  NMR (500 MHz,  $\text{D}_2\text{O}$ , 298 K) spectrum of  $[\text{Zn}(\text{CB-TEMeEtOH})]\text{Cl}_2$ .

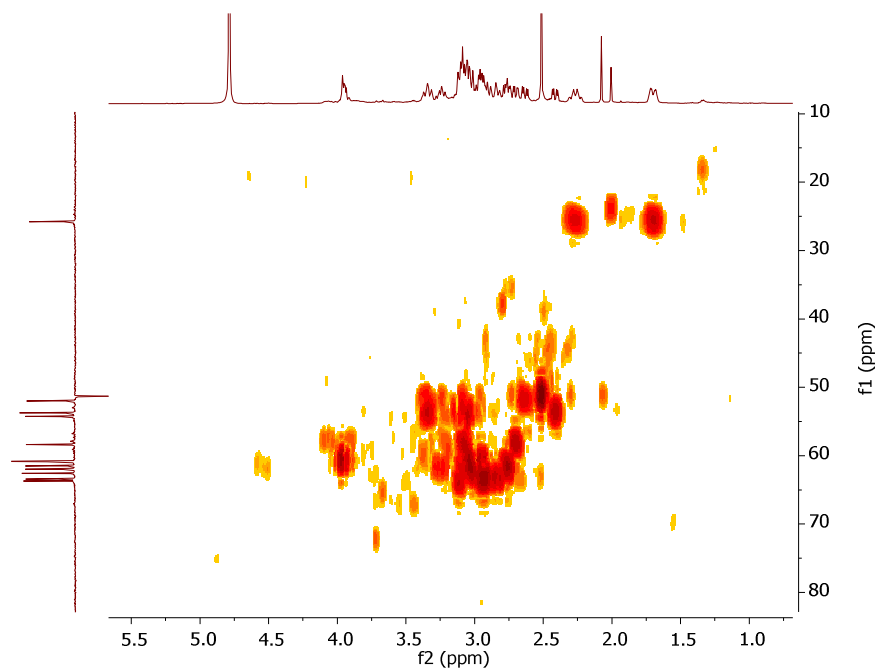

**Figure S27.** 2D HMQC  $^1\text{H}$ - $^{13}\text{C}$  NMR (500 MHz, 125 MHz,  $\text{D}_2\text{O}$ , 298 K) spectrum of  $[\text{Zn}(\text{CB-TEMeEtOH})]\text{Cl}_2$ .

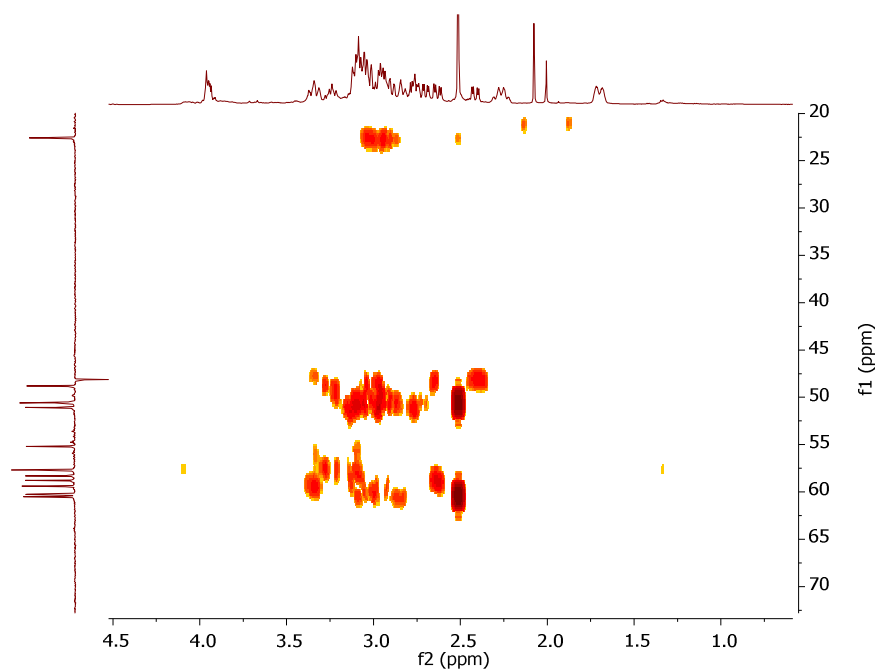

**Figure S28. 2D HMBC  $^1\text{H}$ - $^{13}\text{C}$  NMR (500 MHz, 125 MHz,  $\text{D}_2\text{O}$ , 298 K) spectrum of  $[\text{Zn}(\text{CB-TEMeEtOH})]\text{Cl}_2$ .**



**Table S2. Crystallographic data of [Zn(TE1EtOH)Cl]Cl.**

|                                       |                                                                                                                                      |
|---------------------------------------|--------------------------------------------------------------------------------------------------------------------------------------|
| <b>Empirical formula</b>              | <b>C<sub>12</sub>H<sub>28</sub>Cl<sub>2</sub>N<sub>4</sub>OZn</b>                                                                    |
| <b>Formula weight</b>                 | 380 <sup>o</sup> 65 g/mol                                                                                                            |
| <b>Temperature</b>                    | 150(2) K                                                                                                                             |
| <b>Radiation type</b>                 | Mo-Kalpha                                                                                                                            |
| <b>Wavelength</b>                     | 0 <sup>o</sup> 71073 Å                                                                                                               |
| <b>Crystal system</b>                 | monoclinic, P 21/n                                                                                                                   |
| <b>Unit cell dimensions</b>           | a = 6 <sup>o</sup> 8923(4) Å, b = 14 <sup>o</sup> 6166(10) Å, c = 17 <sup>o</sup> 0777(9) Å, β = 92 <sup>o</sup> 962(2) <sup>o</sup> |
| <b>Volume</b>                         | 1718 <sup>o</sup> 14(18) Å <sup>3</sup>                                                                                              |
| <b>Z, Calculated density</b>          | 4,1 <sup>o</sup> 472 g cm <sup>-3</sup>                                                                                              |
| <b>Absorption coefficient</b>         | 1 <sup>o</sup> 742 mm <sup>-1</sup>                                                                                                  |
| <b>F(000)</b>                         | 800                                                                                                                                  |
| <b>Crystal size</b>                   | 0 <sup>o</sup> 350 x 0 <sup>o</sup> 210 x 0 <sup>o</sup> 130 mm                                                                      |
| <b>Crystal color</b>                  | colorless                                                                                                                            |
| <b>Crystal description</b>            | prism                                                                                                                                |
| <b>θ range for data collection</b>    | 2 <sup>o</sup> 388 to 27 <sup>o</sup> 513 °                                                                                          |
| <b>(sinθ/λ)max (Å<sup>-1</sup>)</b>   | 0 <sup>o</sup> 650                                                                                                                   |
| <b>h_min, h_max</b>                   | -8, 8                                                                                                                                |
| <b>k_min, k_max</b>                   | -16, 18                                                                                                                              |
| <b>l_min, l_max</b>                   | -19, 22                                                                                                                              |
| <b>Reflections collected / unique</b> | 12108 / 3884 [R(int) = 0 <sup>o</sup> 0778]                                                                                          |
| <b>Reflections [I&gt;2sigma(I)]</b>   | 3066                                                                                                                                 |

|                                                         |                                                                                  |
|---------------------------------------------------------|----------------------------------------------------------------------------------|
| <b>Completeness to <math>\theta</math>max</b>           | 0°987                                                                            |
| <b>Absorption correction type</b>                       | multi-scan                                                                       |
| <b>Max° and min° transmission</b>                       | 0°797, 0°520                                                                     |
| <b>Refinement method</b>                                | Full-matrix least-squares on $F^2$                                               |
| <b>H-atom treatment</b>                                 | H-atom parameters treated by a mixture of independent and constrained refinement |
| <b>Data / restraints / parameters</b>                   | 3884 / 1 / 184                                                                   |
| <b>Goodness-of-fit</b>                                  | 1°067                                                                            |
| <b>Final R indices [<math>I &gt; 2\sigma(I)</math>]</b> | R1 = 0°0708                                                                      |
| <b>R indices (all data)</b>                             | R1 = 0°0901                                                                      |
| <b>Largest diff° peak and hole</b>                      | 1°302 and -0°617 e°Å <sup>-3</sup>                                               |

**Table S3. Cartesian coordinates (Å) of [Zn(TE1EtOH)Cl]Cl.**

|            |                   |                   |                   |
|------------|-------------------|-------------------|-------------------|
| <b>Zn1</b> | <b>0°49515(8)</b> | <b>0°29968(4)</b> | <b>0°15625(3)</b> |
| <b>Cl1</b> | 0°75344(17)       | 0°39979(8)        | 0°14499(8)        |
| <b>O1</b>  | 0°5448(8)         | 0°3123(3)         | 0°4612(3)         |
| <b>H1O</b> | 0°551(13)         | 0°346(6)          | 0°512(3)          |
| <b>N1</b>  | 0°4666(7)         | 0°2893(3)         | 0°2851(3)         |
| <b>N2</b>  | 0°2459(6)         | 0°3821(3)         | 0°1607(2)         |
| <b>H2</b>  | 0°130974          | 0°34222           | 0°147455          |
| <b>N3</b>  | 0°4194(6)         | 0°2839(3)         | 0°0337(3)         |
| <b>H3</b>  | 0°29439           | 0°249133          | 0°028655          |
| <b>N4</b>  | 0°6394(7)         | 0°1759(3)         | 0°1410(3)         |
| <b>H4</b>  | 0°780901          | 0°191376          | 0°14388           |
| <b>C1</b>  | 0°5800(11)        | 0°3846(5)         | 0°4081(4)         |
| <b>H1A</b> | 0°693575          | 0°42065           | 0°42824           |
| <b>H1B</b> | 0°465953          | 0°425811          | 0°40436           |
| <b>C2</b>  | 0°6185(9)         | 0°3476(4)         | 0°3273(4)         |
| <b>H2A</b> | 0°644002          | 0°400494          | 0°293116          |
| <b>H2B</b> | 0°739884          | 0°311303          | 0°332081          |
| <b>C3</b>  | 0°2669(9)         | 0°3269(4)         | 0°2930(3)         |
| <b>H3A</b> | 0°249553          | 0°34314           | 0°348447          |
| <b>H3B</b> | 0°169827          | 0°279466          | 0°277549          |
| <b>C4</b>  | 0°2322(8)         | 0°4115(4)         | 0°2418(3)         |
| <b>H4A</b> | 0°102041          | 0°437417          | 0°249784          |

|             |           |           |            |
|-------------|-----------|-----------|------------|
| <b>H4B</b>  | 0°331161  | 0°458794  | 0°255184   |
| <b>C5</b>   | 0°2411(7) | 0°4584(3) | 0°1030(3)  |
| <b>H5A</b>  | 0°362623  | 0°494282  | 0°109731   |
| <b>H5B</b>  | 0°131164  | 0°499592  | 0°113227   |
| <b>C6</b>   | 0°2192(8) | 0°4237(4) | 0°0200(4)  |
| <b>H6A</b>  | 0°194125  | 0°476773  | -0°01511   |
| <b>H6B</b>  | 0°10307   | 0°383861  | 0°015504   |
| <b>C7</b>   | 0°3915(9) | 0°3704(4) | -0°0096(3) |
| <b>H7A</b>  | 0°36845   | 0°357292  | -0°066178  |
| <b>H7B</b>  | 0°510728  | 0°408022  | -0°002953  |
| <b>C8</b>   | 0°5731(9) | 0°2245(4) | 0°0049(4)  |
| <b>H8A</b>  | 0°696808  | 0°258801  | 0°003843   |
| <b>H8B</b>  | 0°536989  | 0°203338  | -0°048916  |
| <b>C9</b>   | 0°5964(8) | 0°1432(4) | 0°0600(4)  |
| <b>H9A</b>  | 0°47546   | 0°106591  | 0°057798   |
| <b>H9B</b>  | 0°703587  | 0°103696  | 0°043536   |
| <b>C10</b>  | 0°6168(9) | 0°1024(4) | 0°1992(4)  |
| <b>H10A</b> | 0°712994  | 0°053599  | 0°190591   |
| <b>H10B</b> | 0°485469  | 0°075354  | 0°191572   |
| <b>C11</b>  | 0°6445(9) | 0°1372(4) | 0°2817(4)  |
| <b>H11A</b> | 0°76175   | 0°176345  | 0°285136   |
| <b>H11B</b> | 0°669604  | 0°084188  | 0°316907   |
| <b>C12</b>  | 0°4757(9) | 0°1914(4) | 0°3119(4)  |

|      |             |             |            |
|------|-------------|-------------|------------|
| H12A | 0°352908    | 0°160641    | 0°294496   |
| H12B | 0°484991    | 0°190239    | 0°369885   |
| Cl2  | 0°10871(19) | 0°15072(10) | 0°13962(9) |

**Table S4. Crystallographic data of [Cu(TE1EtOH)Cl]Cl.**

|                                                   |                                                                                                                                       |
|---------------------------------------------------|---------------------------------------------------------------------------------------------------------------------------------------|
| Empirical formula                                 | $C_{12}H_{31}Cl_2CuN_4O_2 \cdot 50$                                                                                                   |
| Formula weight                                    | 405°85 g/mol                                                                                                                          |
| Temperature                                       | 150 K                                                                                                                                 |
| Wavelength                                        | 0°71073 Å                                                                                                                             |
| Crystal system                                    | monoclinic, C 2/c                                                                                                                     |
| Unit cell dimensions                              | a = 17°5231(10) Å, b = 9°0433(5) Å, c = 23°9772(13) Å,<br>$\alpha = 90^\circ$ , $\beta = 105^\circ052(2)^\circ$ , $\gamma = 90^\circ$ |
| Volume                                            | 3669°2(4) Å <sup>3</sup>                                                                                                              |
| Z, Calculated density                             | 8, 1°469 g°cm <sup>-3</sup>                                                                                                           |
| Absorption coefficient                            | 1°494 mm <sup>-1</sup>                                                                                                                |
| F(000)                                            | 1712                                                                                                                                  |
| Crystal size                                      | 0°360 x 0°280 x 0°100 mm                                                                                                              |
| Crystal color                                     | violet                                                                                                                                |
| Crystal description                               | prism                                                                                                                                 |
| $\theta$ range for data collection                | 2°407 to 27°505 °                                                                                                                     |
| (sin $\theta$ / $\lambda$ )max (Å <sup>-1</sup> ) | 0°65                                                                                                                                  |
| h_min, h_max                                      | -22, 22                                                                                                                               |
| k_min, k_max                                      | -11, 10                                                                                                                               |

|                                                  |                                             |
|--------------------------------------------------|---------------------------------------------|
| <b>l_min, l_max</b>                              | -31, 31                                     |
| <b>Reflections collected / unique</b>            | 24504 / 4151 [R(int) = 0°0705]              |
| <b>Reflections [I&gt;2sigma(I)]</b>              | 3827                                        |
| <b>Completeness to <math>\theta_{max}</math></b> | 0°985                                       |
| <b>Absorption correction type</b>                | multi-scan                                  |
| <b>Max. and min. transmission</b>                | 0°861                                       |
| <b>Refinement method</b>                         | Full-matrix least-squares on F <sup>2</sup> |
| <b>Data / restraints / parameters</b>            | 4151 / 5 / 215                              |
| <b>Goodness-of-fit</b>                           | 1°064                                       |
| <b>Final R indices [I&gt;2sigma(I)]</b>          | R1 = 0°0442                                 |
| <b>R indices (all data)</b>                      | R1 = 0°0475                                 |
| <b>Largest diff. peak and hole</b>               | 0°520 and -1°197 e°Å <sup>-3</sup>          |

**Table S5. Cartesian coordinates (Å) of [Cu(TE1EtOH)Cl]Cl.**

|            |                   |                   |                   |
|------------|-------------------|-------------------|-------------------|
| <b>Cu1</b> | <b>0.22085(2)</b> | <b>0.02511(3)</b> | <b>0.10689(2)</b> |
| <b>Cl1</b> | 0°16857(4)        | 0°07920(7)        | -0°01050(2)       |
| <b>O1</b>  | 0°25976(12)       | -0°0216(2)        | 0°21044(8)        |
| <b>H1O</b> | 0°3015(14)        | 0°032(3)          | 0°2346(13)        |
| <b>N1</b>  | 0°13955(13)       | -0°1381(2)        | 0°10071(9)        |
| <b>H1</b>  | 0°143454          | -0°174329         | 0°14076           |
| <b>N2</b>  | 0°15516(13)       | 0°1847(2)         | 0°13477(9)        |
| <b>N3</b>  | 0°30131(13)       | 0°1855(2)         | 0°10716(9)        |
| <b>H3</b>  | 0°292745          | 0°217199          | 0°066034          |

|              |             |            |             |
|--------------|-------------|------------|-------------|
| <b>N4</b>    | 0°28792(14) | -0°1318(3) | 0°08182(10) |
| <b>H4</b>    | 0°27784     | -0°119564  | 0°039076    |
| <b>C1</b>    | 0°05577(16) | -0°0963(3) | 0°07495(12) |
| <b>H1A</b>   | 0°021571    | -0°182967  | 0°075772    |
| <b>H1B</b>   | 0°049041    | -0°068068  | 0°034064    |
| <b>C2</b>    | 0°02946(17) | 0°0315(4)  | 0°10681(14) |
| <b>H2A</b>   | 0°039669    | 0°005082   | 0°148161    |
| <b>H2B</b> - | 0°028275    | 0°044849   | 0°091492    |
| <b>C3</b>    | 0°07022(16) | 0°1780(3)  | 0°10197(13) |
| <b>H3A</b>   | 0°066395    | 0°197462   | 0°060699    |
| <b>H3B</b>   | 0°041377    | 0°258048   | 0°115988    |
| <b>C4</b>    | 0°19083(17) | 0°3265(3)  | 0°12016(11) |
| <b>H4A</b>   | 0°173811    | 0°41022    | 0°140663    |
| <b>H4B</b>   | 0°172469    | 0°345399   | 0°078127    |
| <b>C5</b>    | 0°28028(17) | 0°3140(3)  | 0°13803(11) |
| <b>H5A</b>   | 0°304602    | 0°405106   | 0°127506    |
| <b>H5B</b>   | 0°299313    | 0°299453   | 0°180295    |
| <b>C6</b>    | 0°38611(16) | 0°1484(3)  | 0°12785(12) |
| <b>H6A</b>   | 0°39836     | 0°121698   | 0°169271    |
| <b>H6B</b>   | 0°418026    | 0°236338   | 0°124052    |
| <b>C7</b>    | 0°40893(18) | 0°0202(4)  | 0°09402(14) |
| <b>H7A</b>   | 0°391651    | 0°043596   | 0°052299    |
| <b>H7B</b>   | 0°467228    | 0°011125   | 0°104677    |

|             |             |            |             |
|-------------|-------------|------------|-------------|
| <b>C8</b>   | 0°37380(18) | -0°1275(4) | 0°10418(15) |
| <b>H8A</b>  | 0°397414    | -0°206398  | 0°085372    |
| <b>H8B</b>  | 0°387714    | -0°148157  | 0°146165    |
| <b>C9</b>   | 0°25327(19) | -0°2776(3) | 0°09000(13) |
| <b>H9A</b>  | 0°268395    | -0°305685  | 0°13132     |
| <b>H9B</b>  | 0°272454    | -0°354862  | 0°067721    |
| <b>C10</b>  | 0°16392(18) | -0°2617(3) | 0°06851(12) |
| <b>H10A</b> | 0°148671    | -0°240447  | 0°026563    |
| <b>H10B</b> | 0°137702    | -0°354458  | 0°07528     |
| <b>C11</b>  | 0°16372(17) | 0°1795(3)  | 0°19885(11) |
| <b>H11A</b> | 0°11208     | 0°20377    | 0°206157    |
| <b>H11B</b> | 0°201861    | 0°256548   | 0°217702    |
| <b>C12</b>  | 0°19134(18) | 0°0314(3)  | 0°22660(11) |
| <b>H12A</b> | 0°203983    | 0°041583   | 0°269128    |
| <b>H12B</b> | 0°148105    | -0°041712  | 0°21473     |
| <b>Cl2</b>  | 0°10664(4)  | 0°63306(7) | 0°19944(3)  |
| <b>O2</b>   | 0           | 0°4019(4)  | 0°25        |
| <b>H2O</b>  | 0°032(2)    | 0°467(4)   | 0°2351(18)  |
| <b>O3</b>   | 0           | 0°8625(4)  | 0°25        |
| <b>H3O</b>  | 0°038(2)    | 0°806(5)   | 0°238(2)    |
| <b>O4</b>   | -0°0634(4)  | 0°1280(6)  | 0°2033(3)   |
| <b>H4O</b>  | -0°042(6)   | 0°041(6)   | 0°223(4)    |
| <b>H5O</b>  | -0°038(5)   | 0°215(6)   | 0°220(4)    |



**Table S6. Crystallographic data of [Zn(TE3MeEtOH)](ZnCl<sub>4</sub>).**

|                                         |                                                                                           |
|-----------------------------------------|-------------------------------------------------------------------------------------------|
| <b>Empirical formula</b>                | <b>C<sub>15</sub>H<sub>38</sub>Cl<sub>4</sub>N<sub>4</sub>O<sub>3</sub>Zn<sub>2</sub></b> |
| <b>Formula weight</b>                   | 595.03 g/mol                                                                              |
| <b>Temperature</b>                      | 150(2) K                                                                                  |
| <b>Wavelength</b>                       | 0.71073 Å                                                                                 |
| <b>Crystal system</b>                   | Orthorhombic, Pbc <sub>a</sub>                                                            |
| <b>Unit cell dimensions</b>             | a = 14.919(2) Å, b = 17.057(2) Å, c = 19.439(2) Å                                         |
| <b>Volume</b>                           | 4946.7(10) Å <sup>3</sup>                                                                 |
| <b>Z, Calculated density</b>            | 8, 1.598 mg/m <sup>3</sup>                                                                |
| <b>Absorption coefficient</b>           | 2.394 mm <sup>-1</sup>                                                                    |
| <b>F(000)</b>                           | 2464                                                                                      |
| <b>Crystal description</b>              | Plate // (1 0 0)                                                                          |
| <b>Crystal color</b>                    | Colorless                                                                                 |
| <b>Crystal size</b>                     | 0.23 x 0.21 x 0.04 mm                                                                     |
| <b>θ range for data collection</b>      | 3.44 to 26.37°                                                                            |
| <b>Limiting indices</b>                 | -18 ≤ h ≤ 11, -20 ≤ k ≤ 21, -24 ≤ l ≤ 15                                                  |
| <b>Reflections collected / unique</b>   | 17758 / 5059 [R(int) = 0.0512]                                                            |
| <b>Completeness to θ = 26.37</b>        | 99.80%                                                                                    |
| <b>Absorption correction</b>            | Analytical                                                                                |
| <b>Max. and min. transmission</b>       | 0.9103 and 0.6089                                                                         |
| <b>Refinement method</b>                | Full-matrix least-squares on F <sup>2</sup>                                               |
| <b>Data / restraints / parameters</b>   | 5059 / 17 / 260                                                                           |
| <b>Goodness-of-fit on F<sup>2</sup></b> | 1.049                                                                                     |

|                                      |                                     |
|--------------------------------------|-------------------------------------|
| Final R indices [ $I > 2\sigma(I)$ ] | R1 = 0°0629                         |
| R indices (all data)                 | R1 = 0°0930                         |
| Largest diff. peak and hole          | 0°894 and -1°221 e° Å <sup>-3</sup> |

**Table S7. Cartesian coordinates (Å) of [Zn(TE3MeEtOH)](ZnCl<sub>4</sub>).**

|             |                  |                  |                  |
|-------------|------------------|------------------|------------------|
| <b>C1</b>   | <b>0.2018(6)</b> | <b>0.2824(5)</b> | <b>0.2299(4)</b> |
| <b>C2</b>   | 0°2985(5)        | 0°2552(5)        | 0°2161(4)        |
| <b>C3</b>   | 0°4045(5)        | 0°2194(4)        | 0°1272(4)        |
| <b>C4</b>   | 0°4289(6)        | 0°2040(5)        | 0°0558(5)        |
| <b>C5</b>   | 0°3728(6)        | 0°1397(5)        | 0°0211(4)        |
| <b>C6</b>   | 0°2299(6)        | 0°0854(5)        | -0°0146(4)       |
| <b>C7</b>   | 0°1916(5)        | 0°0418(4)        | 0°0452(4)        |
| <b>C8</b>   | 0°1116(5)        | 0°0527(4)        | 0°1533(3)        |
| <b>C9</b>   | 0°0618(5)        | 0°0979(5)        | 0°2051(4)        |
| <b>C10</b>  | 0°1154(6)        | 0°1639(5)        | 0°2389(4)        |
| <b>C11I</b> | 0°0501(12)       | 0°2698(12)       | 0°1815(11)       |
| <b>C12I</b> | 0°0657(11)       | 0°3266(9)        | 0°1178(7)        |
| <b>C11J</b> | 0°2789(10)       | 0°2253(9)        | -0°0410(8)       |
| <b>C12J</b> | 0°1783(10)       | 0°2574(10)       | -0°0431(7)       |
| <b>C13</b>  | 0°3187(5)        | 0°3416(4)        | 0°1179(5)        |
| <b>C14I</b> | 0°2561(11)       | 0°2150(9)        | -0°0507(7)       |
| <b>C14J</b> | 0°0571(12)       | 0°2849(11)       | 0°1775(11)       |
| <b>C15</b>  | 0°0452(5)        | 0°1058(4)        | 0°0491(3)        |

|            |           |            |            |
|------------|-----------|------------|------------|
| <b>N1</b>  | 0°1337(4) | 0°2295(4)  | 0°1933(3)  |
| <b>N2</b>  | 0°3150(3) | 0°2575(3)  | 0°1413(3)  |
| <b>N3</b>  | 0°2774(4) | 0°1624(4)  | 0°0082(3)  |
| <b>N4</b>  | 0°1306(3) | 0°0940(3)  | 0°0874(2)  |
| <b>O1I</b> | 0°1133(6) | 0°2858(5)  | 0°0657(5)  |
| <b>O1J</b> | 0°1485(7) | 0°2758(6)  | 0°0246(5)  |
| <b>Zn1</b> | 0°2010(1) | 0°1998(1)  | 0°0981(1)  |
| <b>Cl1</b> | 0°3545(1) | 0°0217(1)  | 0°1948(1)  |
| <b>Cl2</b> | 0°3213(1) | 0°1022(1)  | 0°3719(1)  |
| <b>Cl3</b> | 0°1849(1) | -0°0631(1) | 0°3083(1)  |
| <b>Cl4</b> | 0°4307(1) | -0°0956(1) | 0°3445(1)  |
| <b>Zn2</b> | 0°3256(1) | -0°0091(1) | 0°3078(1)  |
| <b>O2</b>  | 0°5347(5) | 0°0199(6)  | 0°1074(3)  |
| <b>O3I</b> | 0°1457(8) | 0°3957(7)  | -0°0308(6) |
| <b>O3J</b> | 0°0928(8) | 0°4193(7)  | 0°0216(5)  |

**Table S8. Crystallographic data of [Cu(TE3MeEtOH)](ClO<sub>4</sub>)<sub>2</sub>.**

|                                    |                                                                               |
|------------------------------------|-------------------------------------------------------------------------------|
| <b>Empirical formula</b>           | <b>C<sub>15</sub>H<sub>34</sub>Cl<sub>2</sub>CuN<sub>4</sub>O<sub>9</sub></b> |
| <b>Formula weight</b>              | 548.9 g/mol                                                                   |
| <b>Temperature</b>                 | 150(2) K                                                                      |
| <b>Wavelength</b>                  | 0.71073 Å                                                                     |
| <b>Crystal system, space group</b> | Orthorhombic, P n a 21                                                        |

|                                                         |                                                                                               |
|---------------------------------------------------------|-----------------------------------------------------------------------------------------------|
| <b>Unit cell dimensions</b>                             | $a = 15.2412(16) \text{ \AA}$ , $b = 14.7907(17) \text{ \AA}$ , $c = 10.0443(13) \text{ \AA}$ |
| <b>Volume</b>                                           | $2264.3(5) \text{ \AA}^3$                                                                     |
| <b>Z</b>                                                | $1.610 \text{ Mg/m}^3$                                                                        |
| <b>Absorption coefficient</b>                           | $1.254 \text{ mm}^{-1}$                                                                       |
| <b>F(000)</b>                                           | 1148                                                                                          |
| <b>Crystal description</b>                              | Plate // (1 0 -1)                                                                             |
| <b>Crystal color</b>                                    | Blue                                                                                          |
| <b>Crystal size</b>                                     | $0.23 \times 0.15 \times 0.03 \text{ mm}$                                                     |
| <b>Theta range for data collection</b>                  | $3.36$ to $26.37^\circ$                                                                       |
| <b>Limiting indices</b>                                 | $-18 \leq h \leq 19$ , $-13 \leq k \leq 18$ , $-12 \leq l \leq 12$                            |
| <b>Reflections collected / unique</b>                   | 13091 / 4480 [R(int) = $0.0887$ ]                                                             |
| <b>Completeness to <math>\theta = 26.37</math></b>      | $99.70\%$                                                                                     |
| <b>Absorption correction</b>                            | Analytical                                                                                    |
| <b>Max. and min. transmission</b>                       | $0.9633$ and $0.7613$                                                                         |
| <b>Refinement method</b>                                | Full-matrix least-squares on $F^2$                                                            |
| <b>Data / restraints / parameters</b>                   | 4480 / 963 / 275                                                                              |
| <b>Goodness-of-fit on <math>F^2</math></b>              | $1.028$                                                                                       |
| <b>Final R indices [<math>I &gt; 2\sigma(I)</math>]</b> | $R1 = 0.0741$                                                                                 |
| <b>R indices (all data)</b>                             | $R1 = 0.1278$                                                                                 |
| <b>Absolute structure parameter</b>                     | $0.49(6)$                                                                                     |
| <b>Largest diff. peak and hole</b>                      | $0.940$ and $-0.501 \text{ e}^- \text{ \AA}^{-3}$                                             |

**Table S9. Cartesian coordinates (Å) of [Cu(TE3MeEtOH)](ClO<sub>4</sub>)<sub>2</sub>.**

|             |                   |                   |                   |
|-------------|-------------------|-------------------|-------------------|
| <b>C1I</b>  | <b>0.2320(20)</b> | <b>0.0693(18)</b> | <b>0.6140(20)</b> |
| <b>C2I</b>  | 0.2815(15)        | 0.1551(15)        | 0.5850(30)        |
| <b>C3I</b>  | 0.3880(20)        | 0.2108(17)        | 0.4250(30)        |
| <b>C4I</b>  | 0.4256(16)        | 0.2089(18)        | 0.2930(20)        |
| <b>C5I</b>  | 0.3660(20)        | 0.1991(15)        | 0.1790(30)        |
| <b>C6I</b>  | 0.2838(15)        | 0.1090(30)        | 0.0310(20)        |
| <b>C7I</b>  | 0.1915(14)        | 0.1285(18)        | 0.0670(30)        |
| <b>C8I</b>  | 0.0774(13)        | 0.0934(15)        | 0.2350(20)        |
| <b>C9I</b>  | 0.0597(17)        | 0.0440(20)        | 0.3600(20)        |
| <b>C10I</b> | 0.1034(18)        | 0.0731(19)        | 0.4840(20)        |
| <b>C11I</b> | 0.1856(16)        | -0.0701(15)       | 0.5030(30)        |
| <b>C12I</b> | 0.2596(12)        | -0.1250(12)       | 0.4490(20)        |
| <b>C13I</b> | 0.4091(17)        | 0.0660(18)        | 0.5470(30)        |
| <b>C14I</b> | 0.4090(15)        | 0.423(17)         | 0.1390(30)        |
| <b>C15I</b> | 0.1530(20)        | -0.0257(15)       | 0.1110(30)        |
| <b>N1I</b>  | 0.1923(12)        | 0.0263(13)        | 0.4888(19)        |
| <b>N2I</b>  | 0.3468(12)        | 0.1257(16)        | 0.4749(18)        |
| <b>N3I</b>  | 0.3355(11)        | 0.1032(14)        | 0.1660(20)        |
| <b>N4I</b>  | 0.1633(12)        | 0.0640(12)        | 0.1732(18)        |
| <b>O1I</b>  | 0.2916(9)         | -0.0846(10)       | 0.3410(20)        |
| <b>C1J</b>  | 0.2209(12)        | 0.0446(14)        | 0.0631(17)        |
| <b>C2J</b>  | 0.2756(15)        | 0.1280(17)        | 0.0750(30)        |

|             |            |             |            |
|-------------|------------|-------------|------------|
| <b>C3J</b>  | 0.3729(15) | 0.2178(12)  | 0.2270(18) |
| <b>C4J</b>  | 0.4217(12) | 0.2223(15)  | 0.3518(18) |
| <b>C5J</b>  | 0.3677(14) | 0.2028(12)  | 0.4730(19) |
| <b>C6J</b>  | 0.2882(10) | 0.1020(15)  | 0.6088(18) |
| <b>C7J</b>  | 0.1933(10) | 0.1204(14)  | 0.5790(20) |
| <b>C8J</b>  | 0.0752(17) | 0.0980(20)  | 0.4290(30) |
| <b>C9J</b>  | 0.0364(10) | 0.0(11)     | 0.3093(16) |
| <b>C10J</b> | 0.0863(16) | 0.0640(20)  | 0.1860(20) |
| <b>C11J</b> | 0.1654(13) | -0.0788(13) | 0.2010(20) |
| <b>C12J</b> | 0.2510(20) | -0.1230(20) | 0.2350(50) |
| <b>C13J</b> | 0.4207(14) | 0.0698(16)  | 0.1620(30) |
| <b>C14J</b> | 0.4223(12) | 0.0512(16)  | 0.4980(20) |
| <b>C15J</b> | 0.1485(18) | -0.0313(13) | 0.5280(30) |
| <b>N1J</b>  | 0.1739(11) | 0.0187(13)  | 0.1924(16) |
| <b>N2J</b>  | 0.3425(12) | 0.1244(12)  | 0.1907(19) |
| <b>N3J</b>  | 0.3414(12) | 0.1045(14)  | 0.4790(20) |
| <b>N4J</b>  | 0.1636(11) | 0.0589(12)  | 0.4667(17) |
| <b>O1J</b>  | 0.3074(11) | -0.0741(10) | 0.3092(16) |
| <b>Cu1</b>  | 0.2627(1)  | 0.0678(1)   | 0.3322(3)  |
| <b>O2I</b>  | 0.2646(9)  | 0.3931(14)  | 0.3220(20) |
| <b>O3I</b>  | 0.1191(8)  | 0.4430(7)   | 0.3545(16) |
| <b>O4I</b>  | 0.1531(11) | 0.3460(12)  | 0.1832(12) |
| <b>O5I</b>  | 0.1574(10) | 0.2933(9)   | 0.4007(13) |

|             |             |            |            |
|-------------|-------------|------------|------------|
| <b>C11I</b> | 0.1740(7)   | 0.3691(7)  | 0.3162(8)  |
| <b>O2J</b>  | 0.2620(8)   | 0.3973(14) | 0.3370(20) |
| <b>O3J</b>  | 0.1147(9)   | 0.4228(8)  | 0.2801(14) |
| <b>O4J</b>  | 0.1497(12)  | 0.3580(12) | 0.4854(12) |
| <b>O5J</b>  | 0.1701(9)   | 0.2737(7)  | 0.2931(13) |
| <b>C11J</b> | 0.1737(6)   | 0.3636(6)  | 0.3474(7)  |
| <b>O6I</b>  | -0.0798(9)  | 0.2477(13) | 0.8190(30) |
| <b>O7I</b>  | 0.0442(12)  | 0.1581(9)  | 0.8560(20) |
| <b>O8I</b>  | 0.0461(18)  | 0.2699(18) | 0.6881(19) |
| <b>O9I</b>  | 0.0470(15)  | 0.3120(13) | 0.9160(20) |
| <b>C12I</b> | 0.0138(10)  | 0.2488(10) | 0.8188(17) |
| <b>O6J</b>  | 0.0712(14)  | 0.3053(15) | 0.7570(20) |
| <b>O7J</b>  | 0.0250(20)  | 0.1589(12) | 0.8000(30) |
| <b>O8J</b>  | 0.0430(20)  | 0.2600(20) | 0.9771(18) |
| <b>O9J</b>  | -0.0735(10) | 0.2786(16) | 0.8260(40) |
| <b>C12J</b> | 0.0145(7)   | 0.2518(6)  | 0.8431(10) |
| <b>O6K</b>  | -0.0214(12) | 0.2091(14) | 0.7184(18) |
| <b>O7K</b>  | 0.1232(10)  | 0.2135(13) | 0.7940(20) |
| <b>O8K</b>  | 0.0107(13)  | 0.1978(13) | 0.9477(17) |
| <b>O9K</b>  | 0.0305(11)  | 0.3362(8)  | 0.8370(30) |
| <b>C12K</b> | 0.0347(6)   | 0.2383(5)  | 0.8226(13) |

DFT calculations and results

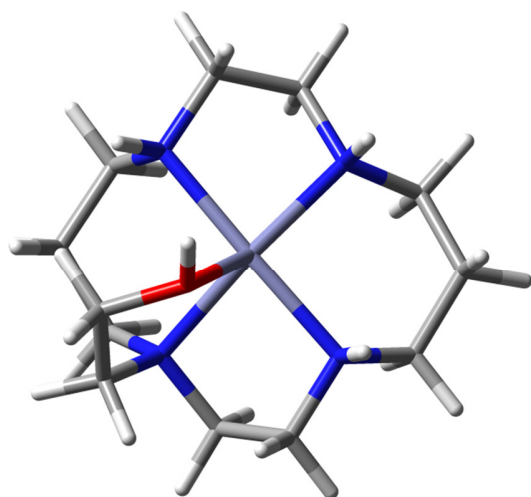

*trans-I*

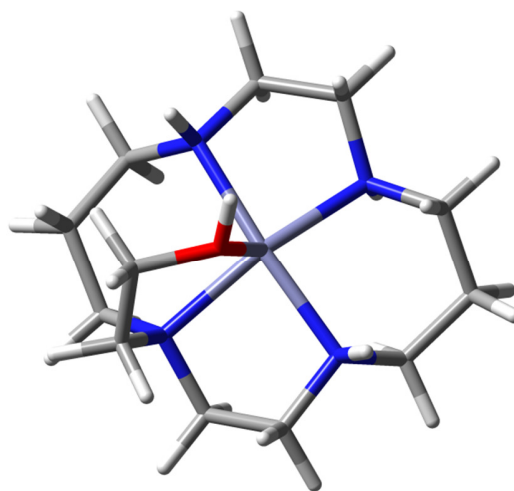

*trans-II*

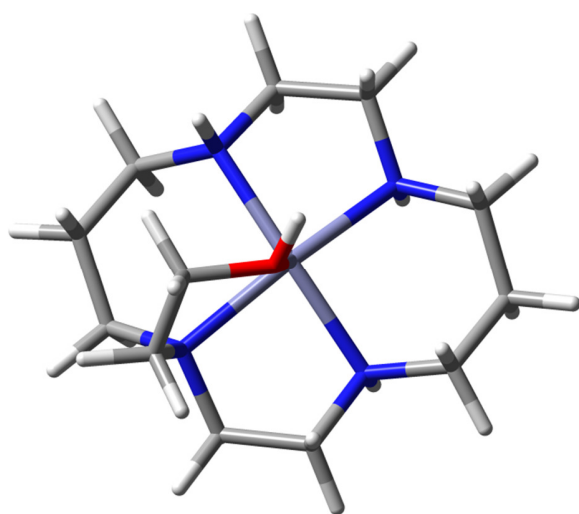

*trans-III*

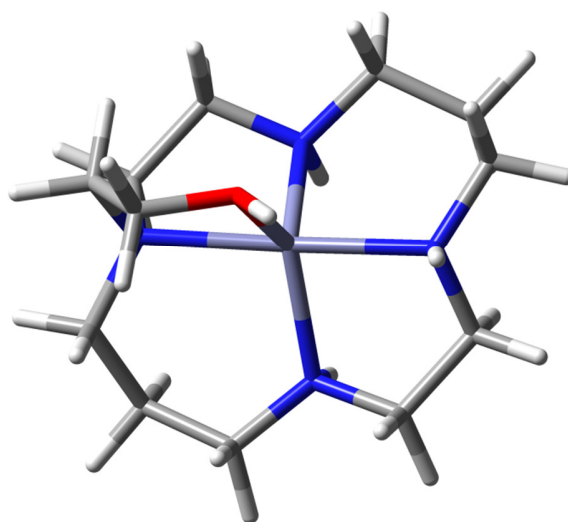

*cis-V*

**Figure S 29. Structures of the different isomers of [Zn(TE1EtOH)]<sup>2+</sup> optimized with DFT calculations (rtpssh/Def2-TZVPP; scrf=(pcm,solvent=water)).**



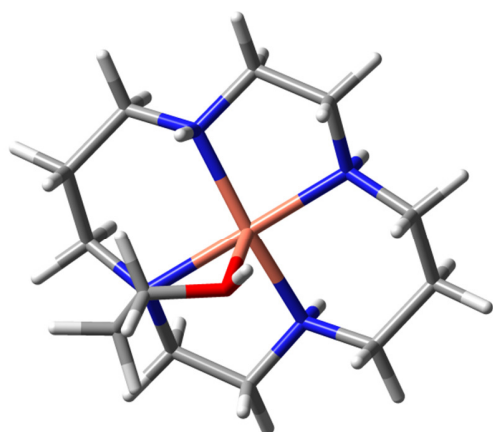

[Cu(TE1EtOH)]<sup>2+</sup> (*trans*-III)

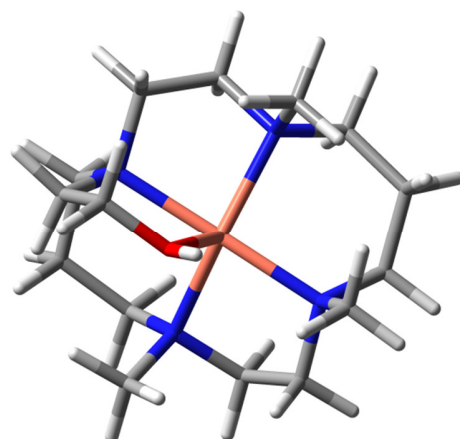

[Cu(TE3MeEtOH)]<sup>2+</sup> (*trans*-I)

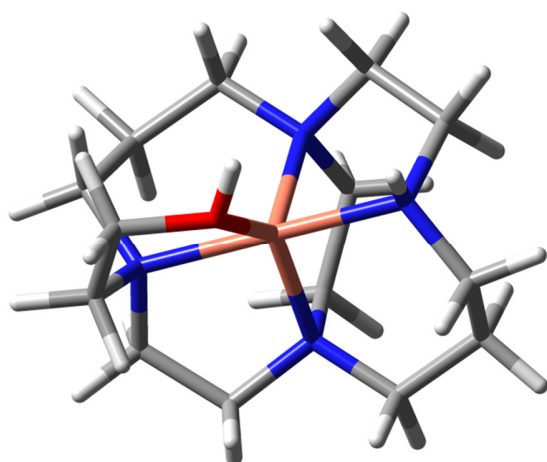

[Cu(CB-TE1EtOH)]<sup>2+</sup> (*cis*-V)

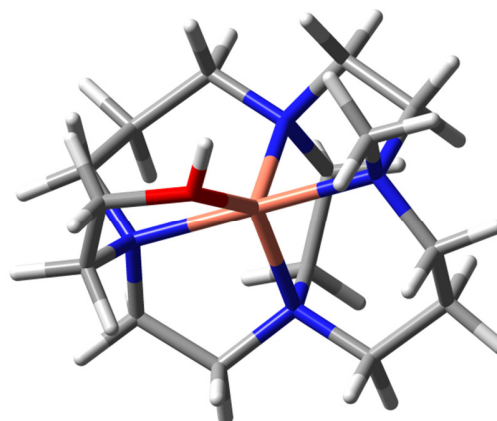

[Cu(CB-TEMeEtOH)]<sup>2+</sup> (*cis*-V)

**Figure S 30. Structures of the Cu(II) complexes optimized with DFT calculations (utpssh/Def2-TZVPP; scrf=(pcm,solvent=water)).**

**Table S 10.  $^{13}\text{C}$  NMR chemical shifts for the central carbon of the propylene units of  $[\text{Zn}(\text{TE1EtOH})]\text{Cl}_2$  and the values calculated with DFT.**

|                   | Exp. | Calcd. | Population / % |
|-------------------|------|--------|----------------|
| <i>trans</i> -III | 30.6 | 32.5   | 44             |
|                   | 28.2 | 30.3   |                |
| <i>trans</i> -I   | 29.9 | 31.6   | 31             |
|                   | 26.7 | 30.0   |                |
| <i>cis</i> -V     | 27.3 | 28.6   | 25             |
|                   | 26.5 | 28.0   |                |

**Table S 11. Cartesian coordinates of  $[\text{Zn}(\text{TE1EtOH})]^{2+}$  (*trans*-I) optimized with DFT calculations (rtpssh/Def2-TZVPP; scrf=(pcm,solvent=water)).**

| Center Number | Atomic Number | Coordinates (Angstroms) |           |           |
|---------------|---------------|-------------------------|-----------|-----------|
|               |               | X                       | Y         | Z         |
| 1             | 7             | -1.954451               | 1.034763  | 0.161976  |
| 2             | 7             | -0.904893               | -1.871793 | -0.268297 |
| 3             | 7             | 1.763844                | -1.080663 | 0.343343  |
| 4             | 7             | 0.801443                | 1.922970  | -0.104086 |
| 5             | 6             | -2.801051               | 0.589994  | -0.977698 |
| 6             | 1             | -2.266609               | 0.823914  | -1.900636 |
| 7             | 1             | -3.728116               | 1.171443  | -0.976136 |
| 8             | 6             | -3.123835               | -0.899408 | -0.926071 |
| 9             | 1             | -3.930492               | -1.082061 | -1.639897 |
| 10            | 1             | -3.523367               | -1.167102 | 0.057988  |
| 11            | 6             | -1.971804               | -1.824396 | -1.302107 |
| 12            | 1             | -2.351552               | -2.836117 | -1.474813 |
| 13            | 1             | -1.506501               | -1.483923 | -2.229211 |
| 14            | 6             | 0.233515                | -2.724088 | -0.682125 |
| 15            | 1             | -0.048761               | -3.779638 | -0.701815 |
| 16            | 1             | 0.503817                | -2.433771 | -1.698243 |
| 17            | 6             | 1.404292                | -2.519623 | 0.267896  |
| 18            | 1             | 1.129481                | -2.842855 | 1.273031  |
| 19            | 1             | 2.258871                | -3.118217 | -0.059253 |
| 20            | 6             | 2.655752                | -0.652503 | -0.768717 |

|    |    |           |           |           |
|----|----|-----------|-----------|-----------|
| 21 | 1  | 2.142050  | -0.860881 | -1.708826 |
| 22 | 1  | 3.566267  | -1.259359 | -0.748116 |
| 23 | 6  | 3.023027  | 0.827208  | -0.700726 |
| 24 | 1  | 3.442841  | 1.073050  | 0.278923  |
| 25 | 6  | 1.913865  | 1.801748  | -1.090573 |
| 26 | 1  | 2.345594  | 2.795349  | -1.256399 |
| 27 | 1  | 1.468681  | 1.475149  | -2.032179 |
| 28 | 6  | -0.330587 | 2.676877  | -0.712843 |
| 29 | 1  | -0.464001 | 2.299035  | -1.727415 |
| 30 | 1  | -0.094499 | 3.743428  | -0.781066 |
| 31 | 6  | -1.612693 | 2.477032  | 0.085654  |
| 32 | 1  | -1.496552 | 2.844489  | 1.105008  |
| 33 | 1  | -2.423113 | 3.044324  | -0.379791 |
| 34 | 1  | 3.835381  | 0.985602  | -1.414387 |
| 35 | 30 | -0.103727 | -0.001028 | 0.383771  |
| 36 | 1  | 2.268268  | -0.938459 | 1.213710  |
| 37 | 1  | -1.311409 | -2.279484 | 0.573054  |
| 38 | 1  | -2.484254 | 0.880637  | 1.016107  |
| 39 | 6  | 1.250274  | 2.606083  | 1.148948  |
| 40 | 1  | 0.503373  | 3.352535  | 1.414841  |
| 41 | 1  | 2.188932  | 3.135858  | 0.970173  |
| 42 | 6  | 1.422586  | 1.659366  | 2.322270  |
| 43 | 1  | 1.506515  | 2.231267  | 3.246871  |
| 44 | 1  | 2.307067  | 1.028314  | 2.222437  |
| 45 | 8  | 0.235744  | 0.835269  | 2.370133  |
| 46 | 1  | 0.273428  | 0.245720  | 3.134585  |

-----  
E(RTPSSh) = -2547.8884658 Hartree  
Zero-point correction = 0.422766  
Thermal correction to Energy = 0.441114  
Thermal correction to Enthalpy = 0.442058  
Thermal correction to Gibbs Free Energy = 0.379084  
Sum of electronic and zero-point Energies = -2547.465700  
Sum of electronic and thermal Energies = -2547.447352  
Sum of electronic and thermal Enthalpies = -2547.446408  
Sum of electronic and thermal Free Energies = -2547.509381  
-----

**Table S 12. Cartesian coordinates of [Zn(TE1EtOH)]<sup>2+</sup> (*trans*-II) optimized with DFT calculations (rtpsSh/Def2-TZVPP; scrf=(pcm,solvent=water)).**

| Center Number | Atomic Number | Coordinates (Angstroms) |           |           |
|---------------|---------------|-------------------------|-----------|-----------|
|               |               | X                       | Y         | Z         |
| 1             | 1             | 1.210153                | -3.630195 | -0.243600 |
| 2             | 6             | -0.749628               | -2.715955 | -0.279489 |
| 3             | 1             | -0.925098               | -2.787138 | 0.796422  |
| 4             | 1             | 0.891053                | -2.635156 | -1.664392 |
| 5             | 6             | 0.741968                | -2.705639 | -0.585498 |
| 6             | 1             | -1.261915               | -1.413290 | -1.764477 |

|    |    |           |           |           |
|----|----|-----------|-----------|-----------|
| 7  | 7  | -1.330955 | -1.439514 | -0.749114 |
| 8  | 6  | -2.739290 | -1.216434 | -0.353472 |
| 9  | 1  | 1.661076  | -1.773139 | 0.979932  |
| 10 | 7  | 1.395275  | -1.517063 | 0.031433  |
| 11 | 1  | 2.363577  | -1.032188 | -1.751285 |
| 12 | 6  | 2.636002  | -1.129528 | -0.698588 |
| 13 | 6  | -3.340158 | 0.008085  | -1.053579 |
| 14 | 30 | -0.080123 | 0.023230  | 0.192986  |
| 15 | 1  | 3.470921  | 0.135441  | 0.857694  |
| 16 | 6  | 3.258335  | 0.176651  | -0.213103 |
| 17 | 1  | 4.234325  | 0.254311  | -0.699207 |
| 18 | 6  | -2.419483 | 1.225480  | -1.192773 |
| 19 | 7  | -1.647089 | 1.490924  | 0.046492  |
| 20 | 1  | 2.201406  | 1.388815  | -1.636376 |
| 21 | 6  | 2.493612  | 1.446585  | -0.586440 |
| 22 | 7  | 1.247631  | 1.696360  | 0.197171  |
| 23 | 1  | 3.151898  | 2.315133  | -0.474514 |
| 24 | 6  | -0.983297 | 2.817616  | 0.085212  |
| 25 | 1  | -0.977321 | 3.147790  | 1.123409  |
| 26 | 1  | 0.415356  | 2.517943  | -1.533599 |
| 27 | 6  | 0.438029  | 2.757665  | -0.469712 |
| 28 | 1  | -1.553976 | 3.554241  | -0.486480 |
| 29 | 1  | -1.224330 | -3.575414 | -0.759757 |
| 30 | 1  | 0.914123  | 3.736788  | -0.357240 |
| 31 | 1  | 3.369459  | -1.937237 | -0.620552 |
| 32 | 1  | -2.278766 | 1.434627  | 0.840013  |
| 33 | 1  | -2.746746 | -1.087288 | 0.730704  |
| 34 | 1  | -3.347883 | -2.096635 | -0.580686 |
| 35 | 1  | -3.664172 | -0.266113 | -2.060418 |
| 36 | 1  | -4.240909 | 0.289008  | -0.502805 |
| 37 | 1  | -1.705618 | 1.074222  | -2.004094 |
| 38 | 1  | -3.022353 | 2.100417  | -1.453631 |
| 39 | 6  | 1.554586  | 2.082804  | 1.610268  |
| 40 | 1  | 0.884583  | 2.892671  | 1.892494  |
| 41 | 1  | 2.575619  | 2.466237  | 1.677838  |
| 42 | 6  | 1.378025  | 0.946497  | 2.602950  |
| 43 | 1  | 1.387028  | 1.345861  | 3.617670  |
| 44 | 1  | 2.157969  | 0.189266  | 2.518004  |
| 45 | 8  | 0.089616  | 0.347467  | 2.331953  |
| 46 | 1  | -0.080198 | -0.369582 | 2.956551  |

---

E(RTPSSh) = -2547.8824995 Hartree  
Zero-point correction = 0.422295  
Thermal correction to Energy = 0.440813  
Thermal correction to Enthalpy = 0.441757  
Thermal correction to Gibbs Free Energy = 0.378376  
Sum of electronic and zero-point Energies = -2547.460204  
Sum of electronic and thermal Energies = -2547.441687  
Sum of electronic and thermal Enthalpies = -2547.440742  
Sum of electronic and thermal Free Energies = -2547.504124

**Table S 13. Cartesian coordinates of [Zn(TE1EtOH)]<sup>2+</sup> (*trans*-III) optimized with DFT calculations (rtssh/Def2-TZVPP; scrf=(pcm,solvent=water)).**

| Center Number | Atomic Number | Coordinates (Angstroms) |           |           |
|---------------|---------------|-------------------------|-----------|-----------|
|               |               | X                       | Y         | Z         |
| 1             | 1             | -1.308451               | -3.677217 | -0.488759 |
| 2             | 6             | 0.646862                | -2.808080 | -0.226601 |
| 3             | 1             | 0.844563                | -2.714334 | -1.296196 |
| 4             | 1             | -1.077022               | -2.904553 | 1.085302  |
| 5             | 6             | -0.857826               | -2.819937 | 0.018893  |
| 6             | 1             | 3.288974                | -2.184049 | 0.069957  |
| 7             | 1             | 1.384024                | -1.871087 | 1.427484  |
| 8             | 7             | 1.276155                | -1.636848 | 0.442359  |
| 9             | 6             | 2.628553                | -1.328500 | -0.098780 |
| 10            | 1             | 2.518752                | -1.203000 | -1.177643 |
| 11            | 1             | -1.309693               | -1.512578 | -1.474464 |
| 12            | 7             | -1.422319               | -1.541074 | -0.462151 |
| 13            | 1             | -2.973550               | -1.355126 | 0.925934  |
| 14            | 6             | -2.859773               | -1.330208 | -0.159957 |
| 15            | 1             | 4.303049                | -0.069286 | 0.201064  |
| 16            | 6             | 3.254304                | -0.073698 | 0.508876  |
| 17            | 1             | 3.273064                | -0.140566 | 1.600064  |
| 18            | 30            | -0.107669               | -0.030447 | 0.333002  |
| 19            | 1             | -3.218274               | 0.022671  | -1.805945 |
| 20            | 6             | -3.369544               | -0.001827 | -0.720845 |
| 21            | 1             | -4.451086               | 0.019175  | -0.568628 |
| 22            | 6             | 2.666274                | 1.258297  | 0.040212  |
| 23            | 1             | 2.552923                | 1.231111  | -1.044960 |
| 24            | 7             | 1.328064                | 1.598993  | 0.607267  |
| 25            | 1             | -2.872689               | 1.237429  | 0.993198  |
| 26            | 6             | -2.800066               | 1.273590  | -0.095746 |
| 27            | 7             | -1.368619               | 1.474460  | -0.442401 |
| 28            | 1             | -1.288385               | 1.453410  | -1.457841 |
| 29            | 1             | -3.383491               | 2.132965  | -0.440461 |
| 30            | 6             | 0.714585                | 2.723666  | -0.158182 |
| 31            | 1             | 0.943557                | 2.566437  | -1.213272 |
| 32            | 1             | -1.063844               | 2.866529  | 1.082547  |
| 33            | 6             | -0.798359               | 2.755573  | 0.030098  |
| 34            | 1             | 1.154473                | 3.679701  | 0.140434  |
| 35            | 1             | 1.097003                | -3.741183 | 0.117898  |
| 36            | 1             | 3.365072                | 2.067519  | 0.279819  |
| 37            | 1             | -1.219657               | 3.604971  | -0.513416 |
| 38            | 1             | -3.452483               | -2.150754 | -0.576502 |
| 39            | 6             | 1.416648                | 1.961590  | 2.054545  |
| 40            | 1             | 2.446466                | 2.216888  | 2.316190  |
| 41            | 1             | 0.807600                | 2.849795  | 2.219026  |
| 42            | 6             | 0.914257                | 0.863871  | 2.971070  |
| 43            | 1             | 0.785160                | 1.252949  | 3.981329  |
| 44            | 1             | 1.585181                | 0.004289  | 3.007224  |

|    |   |           |           |          |
|----|---|-----------|-----------|----------|
| 45 | 8 | -0.369756 | 0.456873  | 2.443707 |
| 46 | 1 | -0.771527 | -0.203317 | 3.023725 |

-----

E(RTPSSh) = -2547.8884707 Hartree  
 Zero-point correction = 0.422096  
 Thermal correction to Energy = 0.440712  
 Thermal correction to Enthalpy = 0.441657  
 Thermal correction to Gibbs Free Energy = 0.377894  
 Sum of electronic and zero-point Energies = -2547.466375  
 Sum of electronic and thermal Energies = -2547.447758  
 Sum of electronic and thermal Enthalpies = -2547.446814  
 Sum of electronic and thermal Free Energies = -2547.510577

**Table S 14. Cartesian coordinates of [Zn(TE1EtOH)]<sup>2+</sup> (*cis-V*) optimized with DFT calculations (rtppssh/Def2-TZVPP; scrf=(pcm,solvent=water)).**

| Center Number | Atomic Number | Coordinates (Angstroms) |           |           |
|---------------|---------------|-------------------------|-----------|-----------|
|               |               | X                       | Y         | Z         |
| 1             | 1             | 4.064104                | 0.663398  | -1.006960 |
| 2             | 1             | 3.702931                | -1.402805 | 0.050439  |
| 3             | 1             | 3.193795                | -0.142460 | 1.167772  |
| 4             | 6             | 3.008048                | 0.406149  | -0.895126 |
| 5             | 1             | 2.624128                | 2.490835  | -1.307864 |
| 6             | 6             | 2.943926                | -0.632100 | 0.225639  |
| 7             | 1             | 2.380002                | 2.042817  | 0.382912  |
| 8             | 1             | 2.707153                | -0.023240 | -1.855588 |
| 9             | 6             | 2.244822                | 1.706479  | -0.646750 |
| 10            | 7             | 1.626809                | -1.313213 | 0.422922  |
| 11            | 1             | 1.996964                | -3.238164 | -0.420103 |
| 12            | 1             | 1.739213                | -1.933718 | -1.577983 |
| 13            | 7             | 0.788546                | 1.527068  | -0.873736 |
| 14            | 1             | 0.217951                | 3.085506  | 0.399790  |
| 15            | 1             | 0.184290                | 3.530930  | -1.312428 |
| 16            | 1             | 0.668216                | 1.292087  | -1.857964 |
| 17            | 6             | 1.398787                | -2.345773 | -0.627625 |
| 18            | 6             | -0.034784               | 2.730765  | -0.601099 |
| 19            | 30            | -0.090610               | -0.004212 | 0.253637  |
| 20            | 6             | -0.076384               | -2.718451 | -0.736977 |
| 21            | 1             | -0.441213               | -3.164059 | 0.189183  |
| 22            | 6             | -1.508646               | 2.349801  | -0.676227 |
| 23            | 1             | -0.209374               | -3.455988 | -1.531922 |
| 24            | 1             | -0.725376               | -1.210054 | -1.951183 |
| 25            | 1             | -2.135155               | 3.223398  | -0.483221 |
| 26            | 1             | -1.747292               | 1.985476  | -1.675960 |
| 27            | 7             | -0.884649               | -1.500703 | -0.988174 |

|    |   |           |           |           |
|----|---|-----------|-----------|-----------|
| 28 | 7 | -1.804419 | 1.263768  | 0.297302  |
| 29 | 6 | -2.348655 | -1.709124 | -0.823916 |
| 30 | 1 | -2.822625 | 0.032408  | -2.010283 |
| 31 | 1 | -2.514496 | -2.075776 | 0.191045  |
| 32 | 6 | -3.121433 | 0.599706  | 0.069930  |
| 33 | 1 | -2.686084 | -2.484047 | -1.518017 |
| 34 | 1 | -3.385483 | 0.105378  | 1.005942  |
| 35 | 6 | -3.137262 | -0.422879 | -1.066153 |
| 36 | 1 | -3.878386 | 1.365471  | -0.125092 |
| 37 | 1 | -4.182957 | -0.705271 | -1.209557 |
| 38 | 1 | -1.853336 | 1.696803  | 1.216193  |
| 39 | 6 | 1.591688  | -1.935295 | 1.775325  |
| 40 | 1 | 0.860311  | -2.742628 | 1.764934  |
| 41 | 1 | 2.565719  | -2.366842 | 2.025243  |
| 42 | 6 | 1.179922  | -0.927812 | 2.826848  |
| 43 | 1 | 1.058706  | -1.420810 | 3.791680  |
| 44 | 1 | 1.899693  | -0.113236 | 2.926771  |
| 45 | 8 | -0.095156 | -0.395107 | 2.393667  |
| 46 | 1 | -0.374145 | 0.302066  | 3.000555  |

-----  
E(RTPSSh) = -2547.8928807 Hartree

Zero-point correction = 0.422505

Thermal correction to Energy = 0.441130

Thermal correction to Enthalpy = 0.442074

Thermal correction to Gibbs Free Energy = 0.377974

Sum of electronic and zero-point Energies = -2547.470376

Sum of electronic and thermal Energies = -2547.451751

Sum of electronic and thermal Enthalpies = -2547.450807

Sum of electronic and thermal Free Energies = -2547.514907

**Table S 15. Cartesian coordinates of [Cu(TE1EtOH)]<sup>2+</sup> (*trans*-III) optimized with DFT calculations (utpssh/Def2-TZVPP; scrf=(pcm,solvent=water)).**

| Center<br>Number | Atomic<br>Number | Coordinates (Angstroms) |          |           |
|------------------|------------------|-------------------------|----------|-----------|
|                  |                  | X                       | Y        | Z         |
| 1                | 1                | 1.288347                | 3.606739 | -0.753114 |
| 2                | 6                | -0.693398               | 2.755921 | -0.616969 |
| 3                | 1                | -0.832203               | 2.676915 | -1.696598 |
| 4                | 1                | 0.926524                | 2.855153 | 0.806974  |
| 5                | 6                | 0.780702                | 2.768335 | -0.270787 |
| 6                | 1                | -3.310767               | 2.197430 | -0.281027 |
| 7                | 1                | -1.387185               | 1.734452 | 1.002173  |
| 8                | 7                | -1.318885               | 1.555327 | 0.001075  |
| 9                | 6                | -2.694226               | 1.323963 | -0.511543 |
| 10               | 1                | -2.621220               | 1.243637 | -1.597450 |
| 11               | 1                | 1.366387                | 1.469695 | -1.726584 |
| 12               | 7                | 1.362458                | 1.474720 | -0.706570 |
| 13               | 1                | 2.757461                | 1.276749 | 0.839850  |

|    |    |           |           |           |
|----|----|-----------|-----------|-----------|
| 14 | 6  | 2.762110  | 1.278657  | -0.251366 |
| 15 | 1  | -4.374902 | 0.055078  | -0.283033 |
| 16 | 6  | -3.338795 | 0.070191  | 0.063225  |
| 17 | 1  | -3.392713 | 0.122995  | 1.153708  |
| 18 | 29 | 0.027734  | 0.012222  | -0.175551 |
| 19 | 1  | 3.343698  | -0.005511 | -1.886843 |
| 20 | 6  | 3.363198  | -0.012422 | -0.791864 |
| 21 | 1  | 4.417125  | -0.029824 | -0.506415 |
| 22 | 6  | -2.701971 | -1.233295 | -0.402741 |
| 23 | 1  | -2.583424 | -1.207717 | -1.487112 |
| 24 | 7  | -1.355087 | -1.521529 | 0.175183  |
| 25 | 1  | 2.698094  | -1.288810 | 0.826806  |
| 26 | 6  | 2.723792  | -1.290355 | -0.264173 |
| 27 | 7  | 1.324380  | -1.459249 | -0.734753 |
| 28 | 1  | 1.331954  | -1.447359 | -1.754555 |
| 29 | 1  | 3.311955  | -2.154440 | -0.586804 |
| 30 | 6  | -0.762790 | -2.689944 | -0.548053 |
| 31 | 1  | -0.957789 | -2.551327 | -1.612167 |
| 32 | 1  | 0.957169  | -2.869749 | 0.757679  |
| 33 | 6  | 0.730154  | -2.747188 | -0.301433 |
| 34 | 1  | -1.249398 | -3.617317 | -0.233605 |
| 35 | 1  | -1.185495 | 3.668956  | -0.275352 |
| 36 | 1  | -3.361345 | -2.073342 | -0.160283 |
| 37 | 1  | 1.176282  | -3.585391 | -0.841348 |
| 38 | 1  | 3.364617  | 2.130347  | -0.580827 |
| 39 | 6  | -1.448273 | -1.842790 | 1.641000  |
| 40 | 1  | -0.826784 | -2.716434 | 1.829857  |
| 41 | 1  | -2.477227 | -2.114635 | 1.886633  |
| 42 | 6  | -0.985522 | -0.726755 | 2.554442  |
| 43 | 1  | -0.933510 | -1.107548 | 3.576400  |
| 44 | 1  | -1.665181 | 0.128178  | 2.544103  |
| 45 | 8  | 0.321406  | -0.330869 | 2.102546  |
| 46 | 1  | 0.675443  | 0.339855  | 2.700303  |

-----  
E(UTPSSh) = -2409.017898 Hartree  
Zero-point correction = 0.423123  
Thermal correction to Energy = 0.441475  
Thermal correction to Enthalpy = 0.442419  
Thermal correction to Gibbs Free Energy = 0.378587  
Sum of electronic and zero-point Energies = -2408.594775  
Sum of electronic and thermal Energies = -2408.576423  
Sum of electronic and thermal Enthalpies = -2408.575479  
Sum of electronic and thermal Free Energies = -2408.639311

**Table S 16. Cartesian coordinates of [Cu(TE3MeEtOH)]<sup>2+</sup> (*trans*-I) optimized with DFT calculations (utpssh/Def2-TZVPP; scrf=(pcm,solvent=water)).**

-----  
Center            Atomic                            Coordinates (Angstroms)  
Number            Number                            X                            Y                            Z



|    |    |           |           |           |
|----|----|-----------|-----------|-----------|
| 1  | 7  | 1.751368  | -1.002387 | -0.178869 |
| 2  | 7  | 0.757439  | 1.920788  | -0.328345 |
| 3  | 7  | -1.881506 | 1.069374  | 0.394579  |
| 4  | 7  | -0.992268 | -1.764251 | -0.477538 |
| 5  | 6  | 2.542850  | -0.522450 | -1.354329 |
| 6  | 1  | 1.974552  | -0.782878 | -2.248129 |
| 7  | 1  | 3.476382  | -1.094919 | -1.380491 |
| 8  | 6  | 2.860913  | 0.965173  | -1.380658 |
| 9  | 1  | 3.477818  | 1.126041  | -2.268329 |
| 10 | 1  | 3.488611  | 1.260059  | -0.538434 |
| 11 | 6  | 1.653185  | 1.878077  | -1.521390 |
| 12 | 1  | 1.990254  | 2.900318  | -1.727858 |
| 13 | 1  | 1.043411  | 1.551960  | -2.366090 |
| 14 | 6  | -0.432088 | 2.749386  | -0.674494 |
| 15 | 1  | -0.154547 | 3.807632  | -0.706634 |
| 16 | 1  | -0.757310 | 2.462410  | -1.674494 |
| 17 | 6  | -1.528292 | 2.521366  | 0.337253  |
| 18 | 1  | -1.206520 | 2.826311  | 1.331489  |
| 19 | 1  | -2.415403 | 3.108495  | 0.084731  |
| 20 | 6  | -2.880035 | 0.790188  | -0.683327 |
| 21 | 1  | -2.475267 | 1.183873  | -1.616025 |
| 22 | 1  | -3.782542 | 1.364603  | -0.447134 |
| 23 | 6  | -3.247111 | -0.673471 | -0.871269 |
| 24 | 1  | -3.675858 | -1.097918 | 0.037822  |
| 25 | 6  | -2.126410 | -1.540659 | -1.421556 |
| 26 | 1  | -2.524527 | -2.520044 | -1.710289 |
| 27 | 1  | -1.708993 | -1.073690 | -2.315317 |
| 28 | 6  | 0.085343  | -2.485473 | -1.213168 |
| 29 | 1  | 0.200755  | -2.003294 | -2.184043 |
| 30 | 1  | -0.211798 | -3.524050 | -1.388633 |
| 31 | 6  | 1.375315  | -2.426474 | -0.430481 |
| 32 | 1  | 1.268842  | -2.932656 | 0.526251  |
| 33 | 1  | 2.179013  | -2.929480 | -0.974563 |
| 34 | 1  | -4.051667 | -0.696596 | -1.610341 |
| 35 | 29 | -0.072621 | 0.038800  | 0.071937  |
| 36 | 6  | -1.443297 | -2.599556 | 0.663335  |
| 37 | 1  | -0.625229 | -2.760887 | 1.359296  |
| 38 | 1  | -2.250908 | -2.108481 | 1.196139  |
| 39 | 1  | -1.798234 | -3.566109 | 0.292936  |
| 40 | 6  | 1.464284  | 2.544696  | 0.818781  |
| 41 | 1  | 2.356413  | 1.979296  | 1.064997  |
| 42 | 1  | 1.752192  | 3.567154  | 0.555752  |
| 43 | 1  | 0.823928  | 2.558929  | 1.695941  |
| 44 | 6  | 2.573775  | -0.908484 | 1.060481  |
| 45 | 1  | 3.390366  | -1.636222 | 1.016365  |
| 46 | 1  | 3.019032  | 0.082180  | 1.092717  |
| 47 | 6  | -2.487155 | 0.797491  | 1.722755  |
| 48 | 1  | -1.778144 | 1.064893  | 2.502643  |
| 49 | 1  | -3.392999 | 1.398754  | 1.846043  |
| 50 | 1  | -2.748506 | -0.251735 | 1.818704  |
| 51 | 6  | 1.761998  | -1.133910 | 2.319104  |

|    |   |          |           |          |
|----|---|----------|-----------|----------|
| 52 | 1 | 1.447731 | -2.173993 | 2.431125 |
| 53 | 1 | 2.370816 | -0.866592 | 3.184791 |
| 54 | 8 | 0.607712 | -0.278932 | 2.239689 |
| 55 | 1 | 0.057762 | -0.417168 | 3.020359 |

-----  
E(UTPSSh) = -2526.9681769 Hartree  
Zero-point correction = 0.505837 (/Particle)  
Thermal correction to Energy = 0.528201  
Thermal correction to Enthalpy = 0.529145  
Thermal correction to Gibbs Free Energy = 0.458266  
Sum of electronic and zero-point Energies = -2526.462340  
Sum of electronic and thermal Energies = -2526.439976  
Sum of electronic and thermal Enthalpies = -2526.439032  
Sum of electronic and thermal Free Energies = -2526.509910

**Table S 17. Cartesian coordinates of [Cu(CB-TE1EtOH)]<sup>2+</sup> (*cis-V*) optimized with DFT calculations (utpssh/Def2-TZVPP; scrf=(pcm,solvent=water)).**

| Center<br>Number | Atomic<br>Number | Coordinates (Angstroms) |           |           |
|------------------|------------------|-------------------------|-----------|-----------|
|                  |                  | X                       | Y         | Z         |
| 1                | 6                | -2.897416               | -0.115309 | -0.671957 |
| 2                | 1                | -3.842601               | 0.434601  | -0.726613 |
| 3                | 1                | -2.885281               | -0.828773 | -1.495792 |
| 4                | 6                | -2.829110               | -0.876773 | 0.650492  |
| 5                | 1                | -2.783745               | -0.199288 | 1.505020  |
| 6                | 6                | -1.749122               | -1.949784 | 0.743192  |
| 7                | 1                | -1.920299               | -2.555177 | 1.640989  |
| 8                | 1                | -1.834820               | -2.610834 | -0.121071 |
| 9                | 6                | 0.580990                | -2.544148 | 0.402279  |
| 10               | 1                | 0.184859                | -3.018972 | -0.495429 |
| 11               | 1                | 0.621247                | -3.300959 | 1.193709  |
| 12               | 6                | 1.979686                | -2.011132 | 0.135363  |
| 13               | 1                | 2.583094                | -2.784787 | -0.341248 |
| 14               | 1                | 2.482444                | -1.742838 | 1.061839  |
| 15               | 6                | 3.040121                | 0.163632  | -0.427460 |
| 16               | 1                | 3.983767                | -0.388951 | -0.420980 |
| 17               | 1                | 3.076829                | 0.878074  | -1.251116 |
| 18               | 6                | 2.872113                | 0.897706  | 0.898273  |
| 19               | 1                | 3.809850                | 1.426792  | 1.084646  |
| 20               | 6                | 1.770112                | 1.950386  | 0.921240  |
| 21               | 1                | 1.914520                | 2.629292  | 0.079259  |
| 22               | 1                | 1.850630                | 2.540894  | 1.840796  |
| 23               | 6                | -0.531350               | 2.537580  | 0.436777  |
| 24               | 1                | -0.072455               | 3.054082  | -0.406834 |
| 25               | 1                | -0.630568               | 3.259332  | 1.254789  |
| 26               | 6                | -1.901239               | 2.009614  | 0.053713  |
| 27               | 1                | -2.447190               | 1.667283  | 0.928479  |
| 28               | 1                | -2.496155               | 2.808722  | -0.394137 |

|    |    |           |           |           |
|----|----|-----------|-----------|-----------|
| 29 | 6  | -0.082429 | 0.740483  | 2.054797  |
| 30 | 1  | -1.117959 | 1.023834  | 2.221716  |
| 31 | 1  | 0.483088  | 1.114544  | 2.912561  |
| 32 | 6  | 0.031202  | -0.795214 | 2.039227  |
| 33 | 1  | 1.055566  | -1.081660 | 2.262027  |
| 34 | 1  | -0.584442 | -1.187032 | 2.854051  |
| 35 | 7  | -1.790629 | 0.864972  | -0.904381 |
| 36 | 7  | 0.383654  | 1.423165  | 0.812778  |
| 37 | 7  | -0.354892 | -1.441920 | 0.755489  |
| 38 | 7  | 1.935684  | -0.794314 | -0.731530 |
| 39 | 1  | 2.766982  | 0.197597  | 1.729855  |
| 40 | 29 | 0.073146  | 0.020708  | -0.744539 |
| 41 | 1  | -3.786736 | -1.394430 | 0.748467  |
| 42 | 1  | 2.078682  | -1.099819 | -1.690614 |
| 43 | 6  | -1.842144 | 1.395839  | -2.301237 |
| 44 | 1  | -2.863548 | 1.700060  | -2.547892 |
| 45 | 1  | -1.203587 | 2.279074  | -2.335315 |
| 46 | 6  | -1.341076 | 0.383254  | -3.301788 |
| 47 | 1  | -1.986108 | -0.491848 | -3.379511 |
| 48 | 1  | -1.244386 | 0.845086  | -4.284525 |
| 49 | 8  | -0.031575 | -0.022813 | -2.830501 |
| 50 | 1  | 0.258114  | -0.799438 | -3.326929 |

-----  
E (UTPSSh) = -2486.4296847 Hartree

Zero-point correction = 0.457865

Thermal correction to Energy = 0.476942

Thermal correction to Enthalpy = 0.477886

Thermal correction to Gibbs Free Energy = 0.413335

Sum of electronic and zero-point Energies = -2485.971819

Sum of electronic and thermal Energies = -2485.952743

Sum of electronic and thermal Enthalpies = -2485.951798

Sum of electronic and thermal Free Energies = -2486.016350

**Table S 18. Cartesian coordinates of [Cu(CB-TEMeEtOH)]<sup>2+</sup> (*cis-V*) optimized with DFT calculations (utpssh/Def2-TZVPP; scrf=(pcm,solvent=water)).**

| Center Number | Atomic Number | Coordinates (Angstroms) |           |           |
|---------------|---------------|-------------------------|-----------|-----------|
|               |               | X                       | Y         | Z         |
| 1             | 6             | 2.815812                | 0.157721  | -0.822747 |
| 2             | 1             | 3.842044                | 0.401507  | -0.528855 |
| 3             | 1             | 2.850003                | -0.772927 | -1.389019 |
| 4             | 6             | 2.266641                | 1.266030  | -1.716894 |
| 5             | 1             | 2.171280                | 2.211398  | -1.179065 |
| 6             | 6             | 0.981936                | 0.929932  | -2.464463 |
| 7             | 1             | 0.796900                | 1.694494  | -3.227856 |
| 8             | 1             | 1.107578                | -0.025000 | -2.977959 |
| 9             | 6             | -1.300689               | 0.116916  | -2.368541 |
| 10            | 1             | -0.860988               | -0.778628 | -2.808774 |

|    |    |           |           |           |
|----|----|-----------|-----------|-----------|
| 11 | 1  | -1.668133 | 0.745552  | -3.187466 |
| 12 | 6  | -2.454232 | -0.252454 | -1.456713 |
| 13 | 1  | -3.168742 | -0.874186 | -2.000285 |
| 14 | 1  | -2.993155 | 0.634228  | -1.134610 |
| 15 | 6  | -2.846354 | -0.654526 | 0.939181  |
| 16 | 1  | -3.878398 | -0.898023 | 0.664539  |
| 17 | 1  | -2.552487 | -1.330945 | 1.744048  |
| 18 | 6  | -2.786728 | 0.786457  | 1.432325  |
| 19 | 1  | -3.602470 | 0.893284  | 2.151777  |
| 20 | 6  | -1.509693 | 1.169620  | 2.164971  |
| 21 | 1  | -1.313845 | 0.433490  | 2.946346  |
| 22 | 1  | -1.644958 | 2.142065  | 2.651687  |
| 23 | 6  | 0.908288  | 1.232831  | 2.187383  |
| 24 | 1  | 0.790974  | 0.412679  | 2.896133  |
| 25 | 1  | 0.971032  | 2.163406  | 2.762274  |
| 26 | 6  | 2.171478  | 1.051432  | 1.370310  |
| 27 | 1  | 2.394139  | 1.941390  | 0.788253  |
| 28 | 1  | 3.023969  | 0.889168  | 2.033716  |
| 29 | 6  | -0.287928 | 2.401395  | 0.391214  |
| 30 | 1  | 0.711155  | 2.827490  | 0.405466  |
| 31 | 1  | -0.957607 | 3.172498  | 0.780720  |
| 32 | 6  | -0.694144 | 2.107995  | -1.066456 |
| 33 | 1  | -1.776949 | 2.135976  | -1.150634 |
| 34 | 1  | -0.317023 | 2.922488  | -1.690770 |
| 35 | 7  | 2.038813  | -0.102751 | 0.429028  |
| 36 | 7  | -0.295891 | 1.225799  | 1.310291  |
| 37 | 7  | -0.223088 | 0.802667  | -1.606703 |
| 38 | 7  | -1.981604 | -0.986921 | -0.237906 |
| 39 | 1  | -3.013080 | 1.499564  | 0.637160  |
| 40 | 29 | 0.021433  | -0.488418 | 0.080273  |
| 41 | 1  | 3.031136  | 1.445906  | -2.476846 |
| 42 | 6  | 2.555129  | -1.329362 | 1.108485  |
| 43 | 1  | 3.646717  | -1.290667 | 1.167737  |
| 44 | 1  | 2.157087  | -1.333091 | 2.123486  |
| 45 | 6  | 2.107356  | -2.578883 | 0.396352  |
| 46 | 1  | 2.538113  | -2.678419 | -0.599876 |
| 47 | 1  | 2.357923  | -3.460845 | 0.985957  |
| 48 | 8  | 0.667579  | -2.464980 | 0.292003  |
| 49 | 1  | 0.334999  | -3.149520 | -0.301622 |
| 50 | 6  | -2.125291 | -2.446381 | -0.487447 |
| 51 | 1  | -1.772502 | -3.002491 | 0.378262  |
| 52 | 1  | -3.179319 | -2.685281 | -0.653739 |
| 53 | 1  | -1.564684 | -2.726484 | -1.378865 |

-----  
E(UTPSSh) = -2525.7466492 Hartree

Zero-point correction = 0.485656

Thermal correction to Energy = 0.506014

Thermal correction to Enthalpy = 0.506958

Thermal correction to Gibbs Free Energy = 0.440098

Sum of electronic and zero-point Energies = -2525.260993

Sum of electronic and thermal Energies = -2525.240635

Sum of electronic and thermal Enthalpies = -2525.239691

Sum of electronic and thermal Free Energies = -2525.306551

**Table S 19. NMR calculation for EPR-TPSSh of [Cu(CBTE1EtOH)]<sup>2+</sup>**

```
#
#
! uks tpssh tightscf Normalprint grid5 def2-TZVPP def2/JK SOMF(1X) RIJK
cpcm(water)
%pal
  nprocs 12
end
* xyz 2 2
C      2.68644300    0.89820800    0.19204400
H      3.64878300    0.76128700    0.69594500
H      2.89108400    1.06559300   -0.86530500
C      1.98326200    2.12671000    0.76622300
H      1.70885400    1.98296900    1.81278900
C      0.80284900    2.65416400   -0.04293600
H      0.50869500    3.63506700    0.34840200
H      1.12016400    2.79410300   -1.07783200
C     -1.26341000    2.15069300   -1.21596800
H     -0.62302500    2.23363700   -2.09419600
H     -1.73029200    3.12739400   -1.04619900
C     -2.34130500    1.10524100   -1.45444600
H     -2.81863100    1.28287600   -2.41902200
H     -3.12157000    1.16450200   -0.69894700
C     -2.74169200   -1.28124800   -0.89297200
H     -3.68398500   -1.16504200   -1.43559400
H     -2.33828100   -2.26654100   -1.13096600
C     -3.00071000   -1.16695200    0.60519500
H     -3.84138300   -1.82806100    0.82929300
C     -1.84930300   -1.61425200    1.49808600
H     -1.54162900   -2.61760100    1.19921100
H     -2.19473700   -1.66900300    2.53656600
C      0.51661400   -1.51586700    2.01672600
H      0.51512000   -2.49976000    1.54663100
H      0.39438700   -1.66229300    3.09539800
C      1.82649100   -0.80017000    1.74454400
H      1.92142100    0.08970800    2.36063800
H      2.66599200   -1.45010600    2.00122900
C     -0.80843500    0.55303000    2.13070400
H      0.10670900    0.76887200    2.67512700
H     -1.60193500    0.47224300    2.87858200
C     -1.14290200    1.73631700    1.20362000
H     -2.20267600    1.71611200    0.96386600
H     -0.96882200    2.66109200    1.76126100
N      1.92837600   -0.38689000    0.30955100
N     -0.63300600   -0.76001100    1.44437400
N     -0.38541600    1.76601800   -0.07724300
N     -1.76993900   -0.27540100   -1.41629600
```

|    |             |             |             |
|----|-------------|-------------|-------------|
| H  | -3.34310400 | -0.16538700 | 0.87420800  |
| Cu | 0.04733500  | -0.28399400 | -0.50474800 |
| H  | 2.73115700  | 2.92369800  | 0.77517000  |
| H  | -1.56705400 | -0.54631900 | -2.37497500 |
| C  | 2.61010700  | -1.47261700 | -0.45994300 |
| H  | 3.67939700  | -1.47927400 | -0.22922600 |
| H  | 2.18233800  | -2.42002300 | -0.13061800 |
| C  | 2.39580900  | -1.32220300 | -1.94619800 |
| H  | 2.87495100  | -0.43334400 | -2.35639700 |
| H  | 2.76878200  | -2.20329200 | -2.46867600 |
| O  | 0.96105700  | -1.22551600 | -2.13040100 |
| H  | 0.77508600  | -0.94550600 | -3.03622400 |

\*

```
%cpcm smd true # turn on SMD
smdsolvent "water" # specify the name of solvent from the list
end
%method
SpecialGridAtoms 29
SpecialGridIntAcc 7
end
%eprnmr gtensor true ori CenterOfElCharge
Nuclei = all Cu {aiso,adip,fgrad}
end
```

Visible spectra of copper complexes of TE1EtOH, TE3MeEtOH, CB-TE1EtOH and CB-TEMeEtOH

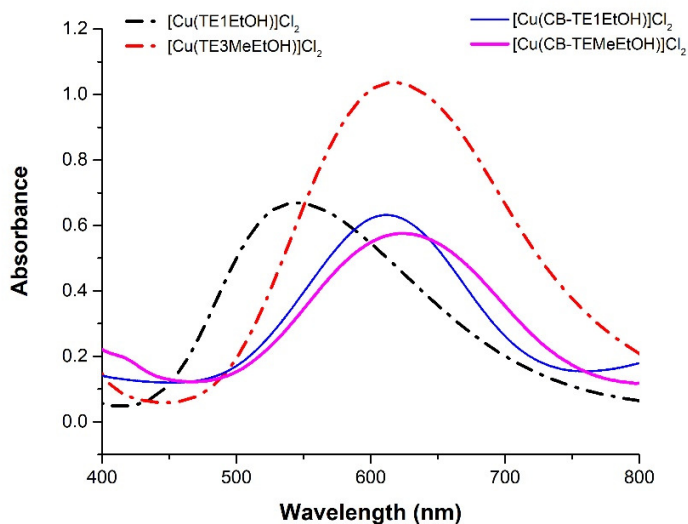

**Figure S31. Visible spectra of [Cu(TE1EtOH)Cl<sub>2</sub>] (black dashed), [Cu(TE3MeEtOH)Cl<sub>2</sub>] (red dashed), [Cu(CB-TE1EtOH)Cl<sub>2</sub>] (blue) and [Cu(CB-TEMeEtOH)Cl<sub>2</sub>] (purple) recorded in ultra-pure water at 6 mM for complexes' concentration.**

Experimental and simulated X band EPR spectra of Copper(II) complexes considering the presence of one paramagnetic species in solution.

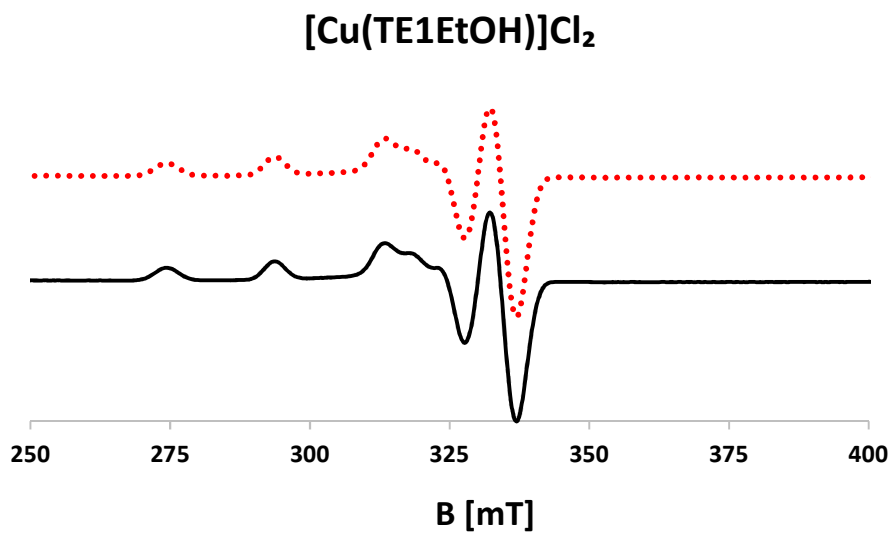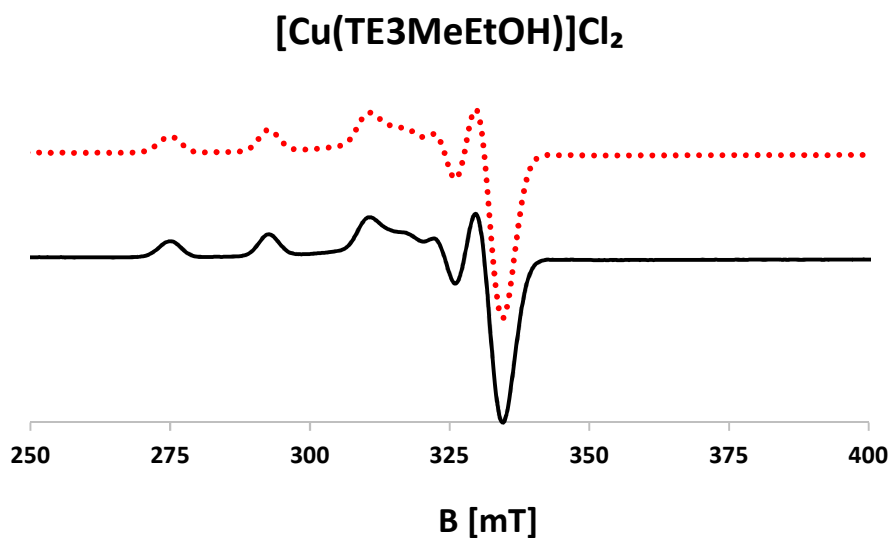

**Figure S32.** Experimental (plain lines) and simulated (dashed lines) X-band EPR spectra ( $\nu = 9.31$  GHz) of [Cu(TE1EtOH)]<sup>2+</sup>, [Cu(TE3MeEtOH)]<sup>2+</sup>, recorded at 20 mM in a frozen solution of H<sub>2</sub>O/DMF (1/1) at a 150-152 K.



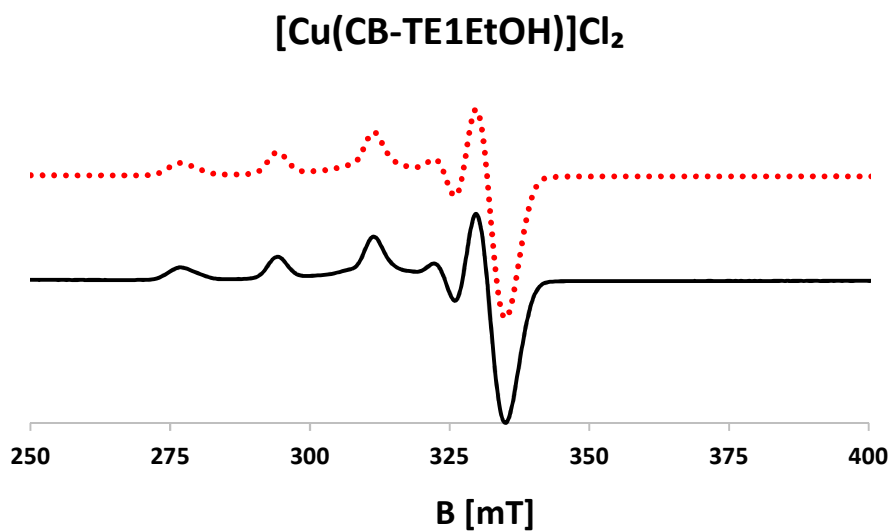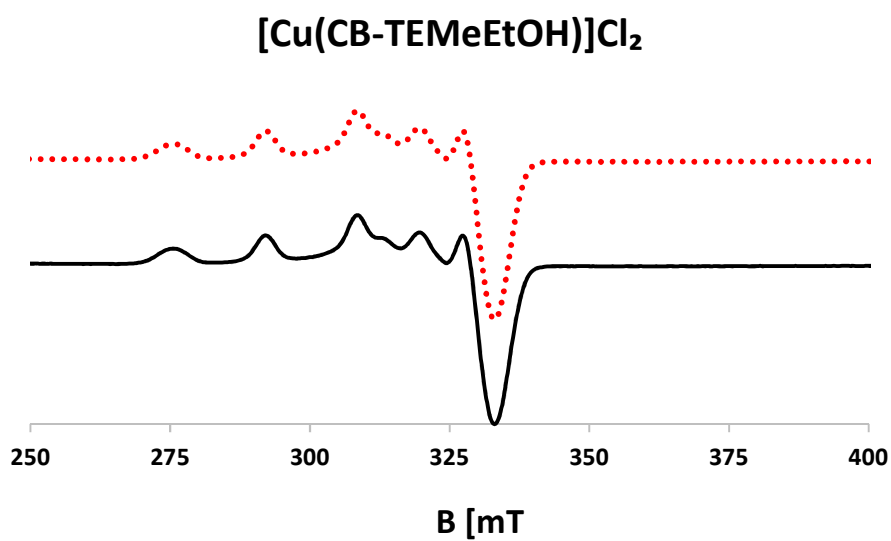

**Figure S33. Experimental (plain lines) and simulated (dashed lines) X-band EPR spectra ( $\nu = 9.31$  GHz) of [Cu(CB-TE1EtOH)]<sup>2+</sup> and [Cu(CB-TEMeEtOH)]<sup>2+</sup> recorded at 20 mM in a frozen solution of H<sub>2</sub>O/DMF (1/1) at a 150-152 K.**

Experimental and simulated X-band EPR spectra of  $[\text{Cu}(\text{CB-TEmEtOH})]\text{Cl}_2$  considering the presence of two paramagnetic species in solution.

**$[\text{Cu}(\text{CB-TEmEtOH})]\text{Cl}_2$  - species A**

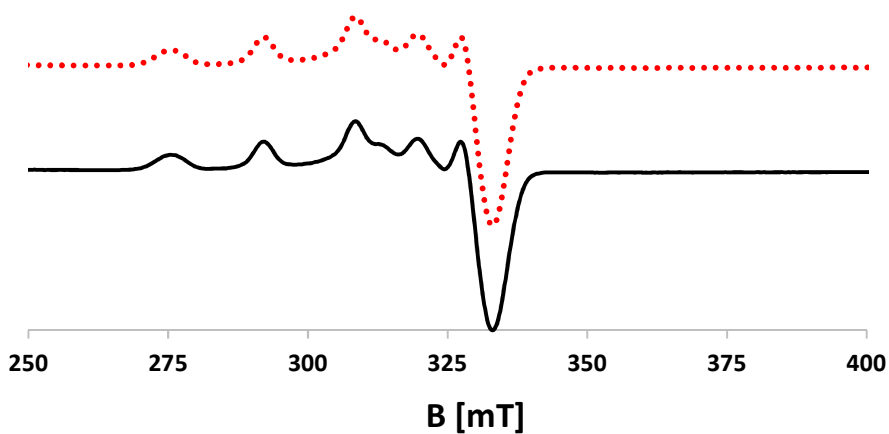

**$[\text{Cu}(\text{CB-TEmEtOH})]\text{Cl}_2$  - species B**

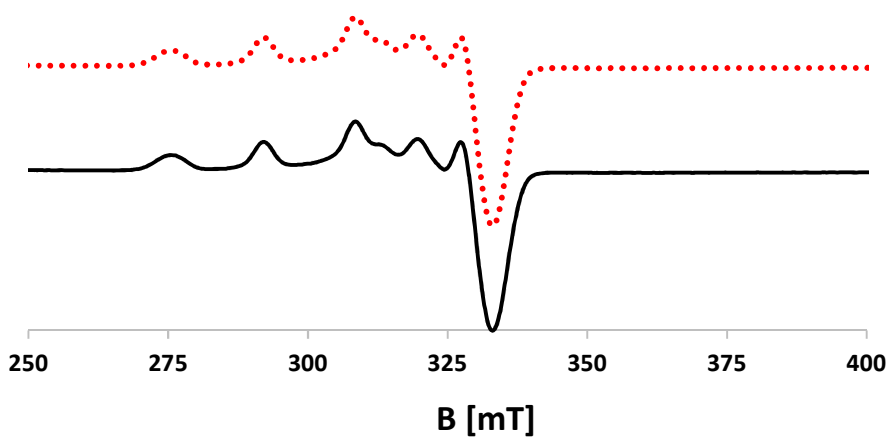

**[Cu(CB-TEMeEtOH)]Cl<sub>2</sub> - Full simulation (A & B)**

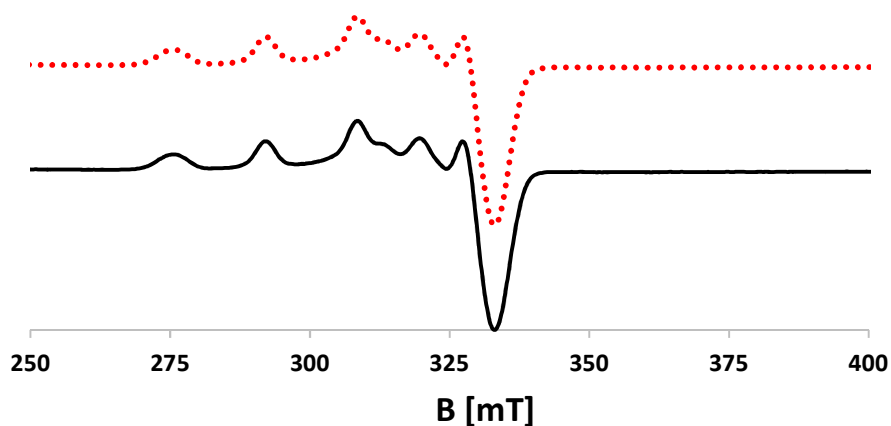

**Figure S34.** Experimental (plain lines) and simulated (dashed lines) X-band EPR spectra ( $\nu = 9.31$  GHz) of  $[\text{Cu}(\text{CB-TEMeEtOH})]^{2+}$  recorded at 20 mM in a frozen solution of  $\text{H}_2\text{O}/\text{DMF}$  (1/1) at a 150-152 K, considering the presence of two species in solution (A & B).

**Table S20.** EPR parameters for  $[\text{Cu}(\text{CB-TEMeEtOH})]\text{Cl}_2$  reported in this work (Figure S34, 150 K in  $\text{H}_2\text{O}/\text{DMF}$  (1:1)) considering the presence of two paramagnetic species in solution A & B.

| $[\text{Cu.CB-TEMeEtOH}]\text{Cl}_2$ | $g_z$ | $g_y$ | $g_x$ | $A_z$ | $A_y$ | $A_x$ |
|--------------------------------------|-------|-------|-------|-------|-------|-------|
| A                                    | 2.209 | 2.050 | 2.050 | 171.6 | -     | -     |
| B                                    | 2.032 | 2.085 | 2.214 | 38.9  | 56.9  | 175.2 |

## Study of Copper(II) complexes dissociation in acidic media

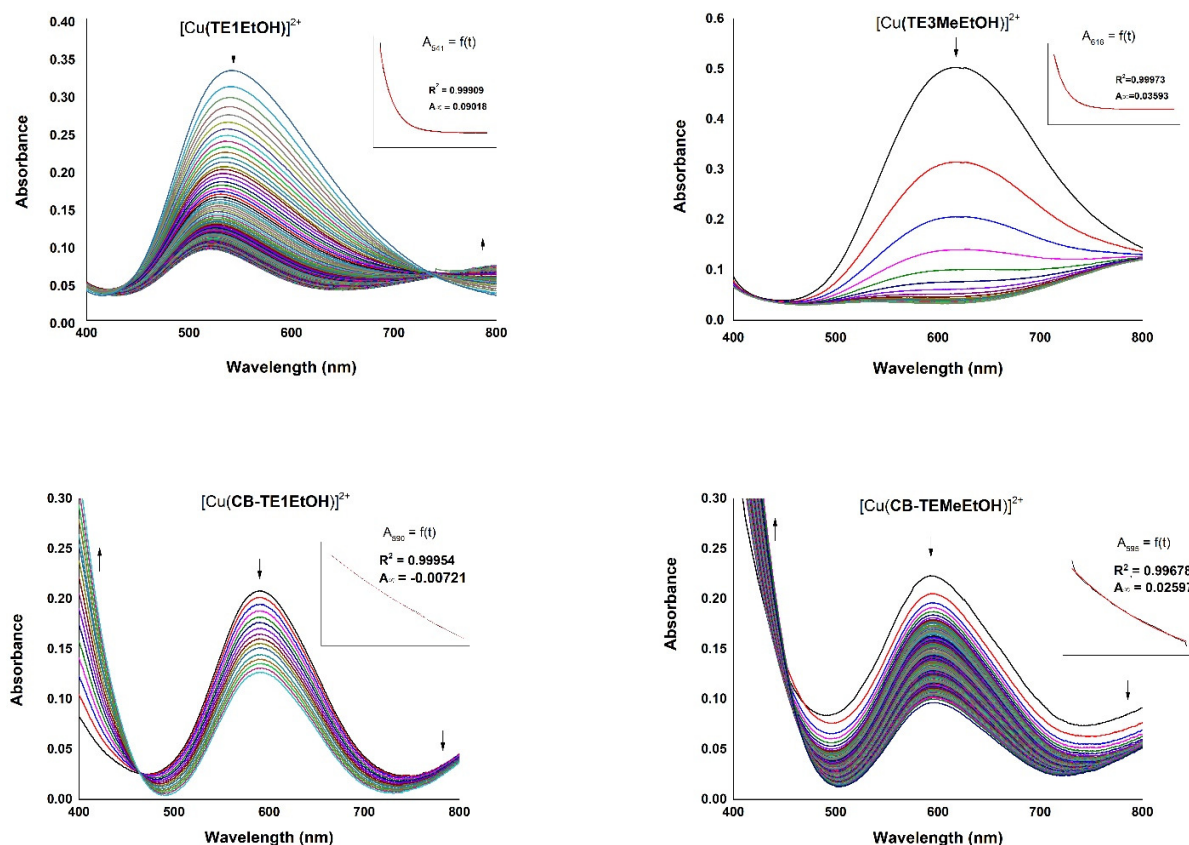

**Figure S35.** Visible spectra of acid-mediated dissociation of  $[\text{Cu}(\text{TE1EtOH})]^{2+}$ ,  $[\text{Cu}(\text{TE3MeEtOH})]^{2+}$  (3 mM in 3 M HCl at 25 °C),  $[\text{Cu}(\text{CB-TE1EtOH})]^{2+}$  and  $[\text{Cu}(\text{CB-TEMeEtOH})]^{2+}$  (3 mM in 5 M HCl at 70 °C) with a gap time ranging from 10 to 30 minutes. Arrows indicate the changes in absorbance during the experiment on both sides of isobestic points. Exponential curves corresponding to experimental/model fitting of the function  $A_{\lambda_{\text{max}}} = f(t)$  made on OriginPro9.  $R^2$  is the adjusting parameter and  $A_{\infty}$  the asymptote of the exponential model.

## Electrochemical studies of Copper(II) complexes

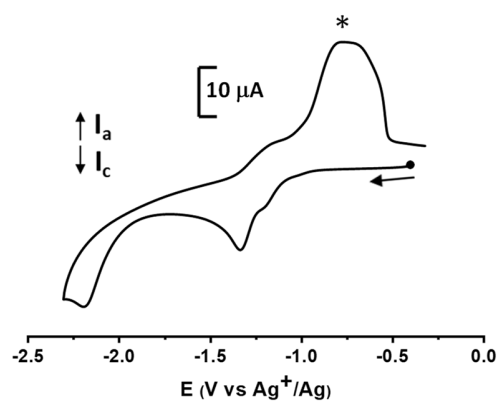

Figure S 36. Cyclic voltammograms of [Cu(TE1EtOH)]Cl<sub>2</sub> in DMF + TBAPF<sub>6</sub> (0.1 M). Scan rate 0.1 V.s<sup>-1</sup>. \*Signals are attributed to redissolution peaks.

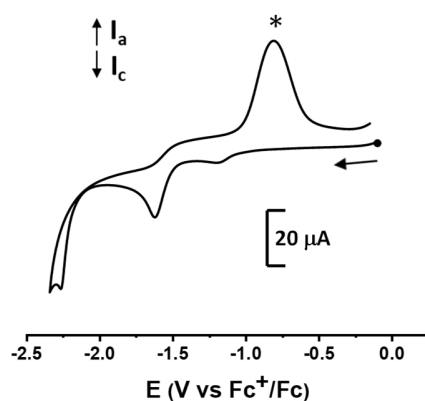

Figure S 37. Cyclic voltammograms of [Cu(CB-TEEtOH)]Cl<sub>2</sub> in DMF + TBAPF<sub>6</sub> (0.1 M). Scan rate 0.1 V.s<sup>-1</sup>. \*Signals are attributed to redissolution peaks.

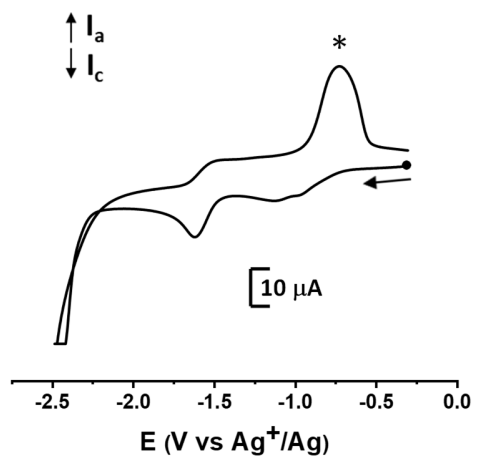

**Figure S 38. Cyclic voltammograms of [Cu(CB-TEMeEtOH)]Cl<sub>2</sub> in DMF + TBAPF<sub>6</sub> (0.1 M). Scan rate 0.1 V.s<sup>-1</sup>. \*Signals are attributed to redissolution peaks.**
